# Supplementary material for: Theoretical study of the ligand effect on NHC–cobalt-catalyzed hydrogenation of ketones
Source: Royal Society of Chemistry journal article supplement (doi:10.1039/c9cy01239g), 2019-01-01
Supplement: c9cy01239g1.pdf [file c9cy01239g1.pdf]

## Supporting Information

Theoretical Study of Ligand Effect in NHC-Cobalt-Catalyzed Hydrogenation of Ketones

Juan Wang,<sup>a</sup> Kangbing Wu,<sup>\*a</sup> and Xiaotian Qi,<sup>\*b</sup>

<sup>a</sup> Key Laboratory for Material Chemistry of Energy Conversion and Storage, Ministry of Education, School of Chemistry and Chemical Engineering, Huazhong University of Science and Technology, Wuhan 430074, China.

<sup>b</sup> Department of Chemistry, University of Pittsburgh, Pittsburgh, PA 15260, USA.

\*Correspondence to: [kbwu@hust.edu.cn](mailto:kbwu@hust.edu.cn); [xiq23@pitt.edu](mailto:xiq23@pitt.edu)

### Table of Contents

|                                                                                                                                                     |   |
|-----------------------------------------------------------------------------------------------------------------------------------------------------|---|
| 1. Comparison between triplet and singlet free energy profiles of pincer cobalt(I)-catalyzed hydrogenation of acetophenone with NHC ligand L1 ..... | 2 |
| 2. Free energy profiles of pincer cobalt(I)-catalyzed hydrogenation of acetophenone with NHC ligand L3 .....                                        | 3 |
| 3. Non-covalent interactions between ligand and substrate in TS1 and TS1-L3.....                                                                    | 4 |
| 4. Distortion-interaction analysis of transition states TS3-L2, TS3, and TS3-L3 .....                                                               | 5 |
| 5. Free energy profiles of pincer cobalt(I)-catalyzed hydrogenation of acetophenone with phosphine ligand L5 .....                                  | 6 |
| 6. Free energy profiles of L4 and L5 involved catalyst regeneration with ammonia borane as the hydrogen donor .....                                 | 7 |
| 7. Intermediates formed through the interaction of H <sub>2</sub> with T-shaped tridentate cobalt(I) complex 5, 5-L4, and 5-L5. ....                | 8 |
| 8. Cartesian coordinates and energies of optimized structures .....                                                                                 | 9 |

## 1. Comparison between triplet and singlet free energy profiles of pincer cobalt(I)-catalyzed hydrogenation of acetophenone with NHC ligand L1

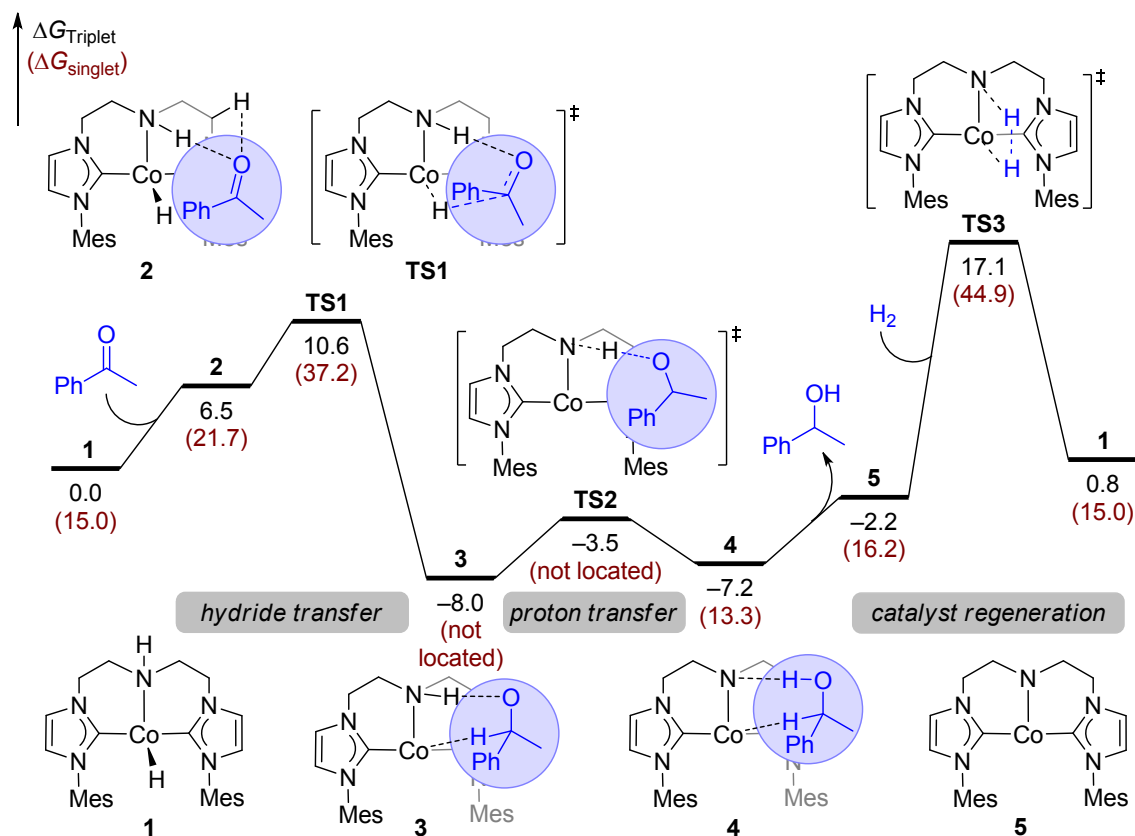

**Figure S1.** Comparison between triplet and singlet free energy profiles of pincer cobalt(I)-catalyzed hydrogenation of acetophenone with NHC ligand L1.

Both triplet and singlet free energy profiles are calculated for cobalt(I)-catalyzed hydrogenation of acetophenone. As shown in Figure S1, the relative free energies of singlet intermediate and transition state with respect to triplet cobalt(I) hydride 1 are in red. The higher relative free energy of singlet structures suggests that triplet cobalt(I) complex is more stable in this catalytic system. The  $\langle S^2 \rangle$  of each triplet intermediate and transition state in NHC ligand L1 involved hydrogenation free energy profile are shown in Table S1. These results show that the  $\langle S^2 \rangle$  of calculated triplet complexes is very close to 2.0.

**Table S1.** The  $\langle S^2 \rangle$  of triplet cobalt complexes in NHC ligand L1 involved hydrogenation free energy profile

| Complexes  | <S**2> before annihilation | <S**2> after annihilation |
|------------|----------------------------|---------------------------|
| <b>1</b>   | 2.0629                     | 2.0009                    |
| <b>2</b>   | 2.0662                     | 2.0010                    |
| <b>TS1</b> | 2.0600                     | 2.0008                    |
| <b>3</b>   | 2.0254                     | 2.0003                    |
| <b>TS2</b> | 2.0166                     | 2.0001                    |
| <b>4</b>   | 2.0387                     | 2.0006                    |
| <b>5</b>   | 2.0432                     | 2.0008                    |
| <b>TS3</b> | 2.0330                     | 2.0005                    |

## 2. Free energy profiles of pincer cobalt(I)-catalyzed hydrogenation of acetophenone with NHC ligand L3

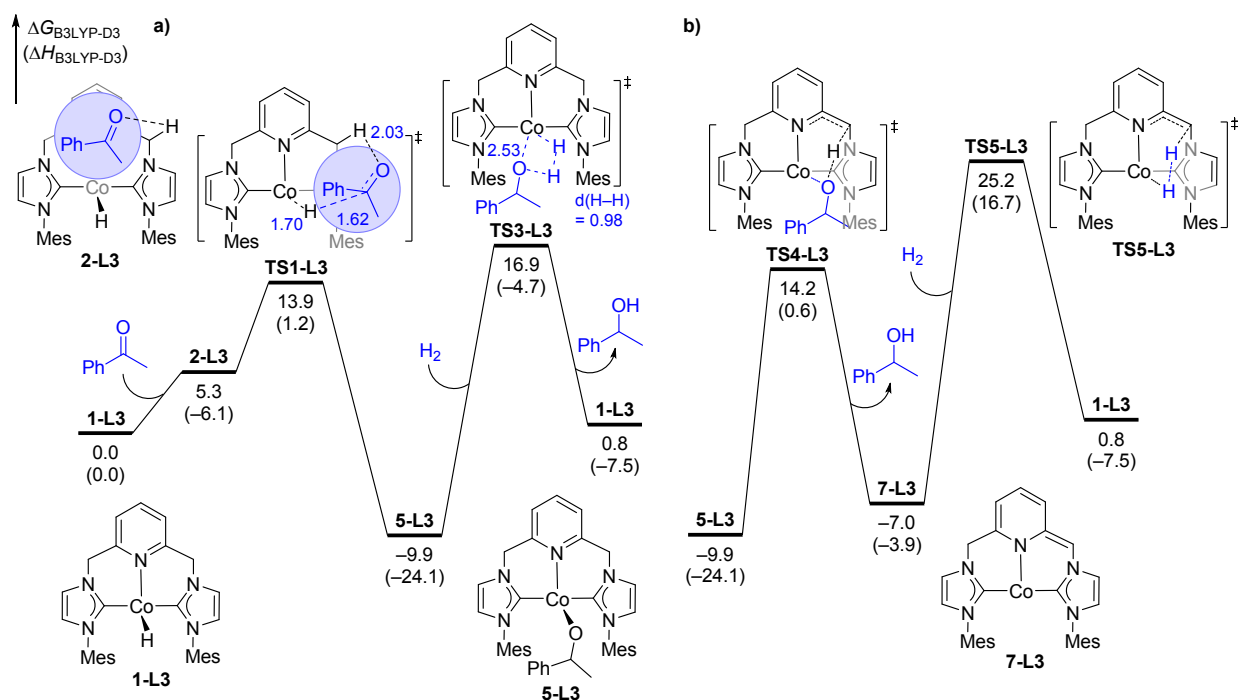

**Figure S2.** a) Free energy profile of pincer cobalt(I)-catalyzed hydrogenation of acetophenone with NHC ligand L3. b) Competing pathway for catalyst regeneration with the participation of reactive C–H bond on ligand backbone.

The complete free energy profile for cobalt(I)-catalyzed hydrogenation of acetophenone with NHC ligand L3 are shown in Figure S2a. Besides the H<sub>2</sub> splitting transition state TS3-L3, another possible pathway for the L3 involved catalyst regeneration process are also proposed. The computational results are shown in Figure S2b. In this pathway, an intramolecular proton

transfer (**TS4-L3**) could occur from intermediate **5-L3** to generate the product 1-phenylethanol. The reactive C–H bond on ligand **L3** is used as the hydrogen donor. This step bears an activation free energy of 24.1 kcal/mol. However, subsequent H<sub>2</sub> splitting transition state (**TS5-L3**) for catalyst regeneration has an activation free energy of 35.1 kcal/mol, which is 8.3 kcal/mol higher than that of **TS3-L3** in Figure 6. Therefore, this possibility could be ruled out.

### 3. Non-covalent interactions between ligand and substrate in **TS1** and **TS1-L3**

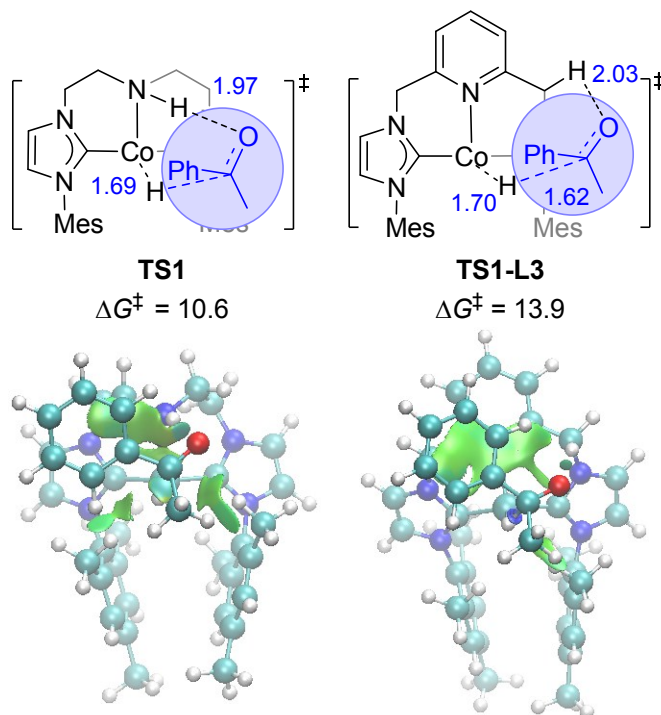

**Figure S3.** Non-covalent interactions between ligand and substrate in **TS1** and **TS1-L3**.

The non-covalent interactions (NCI) between pincer ligand and the substrate ketone in transition states **TS1** and **TS1-L3** are visualized with the aid of NCI plot. As shown in Figure S3, the non-covalent ligand-substrate interactions in **TS1** included the non-covalent interaction between the carbonyl group of the substrate and alkyl C–H bonds on the ligand, as well as the interaction between phenyl group of the substrate and the NHC part of ligand. It is similar to the ligand-substrate interaction in transition state **TS1-L2**. While in **TS1-L3**, the non-covalent interaction between the carbonyl group of the substrate and alkyl C–H bonds on the ligand is shown to be negligible. Therefore, the ligand-substrate interaction in **TS1-L3** is diminished

compared with that in **TS1** and **TS1-L2**, which accounts for the higher activation free energy of transition state **TS1-L3**.

#### 4. Distortion-interaction analysis of transition states **TS3-L2**, **TS3**, and **TS3-L3**

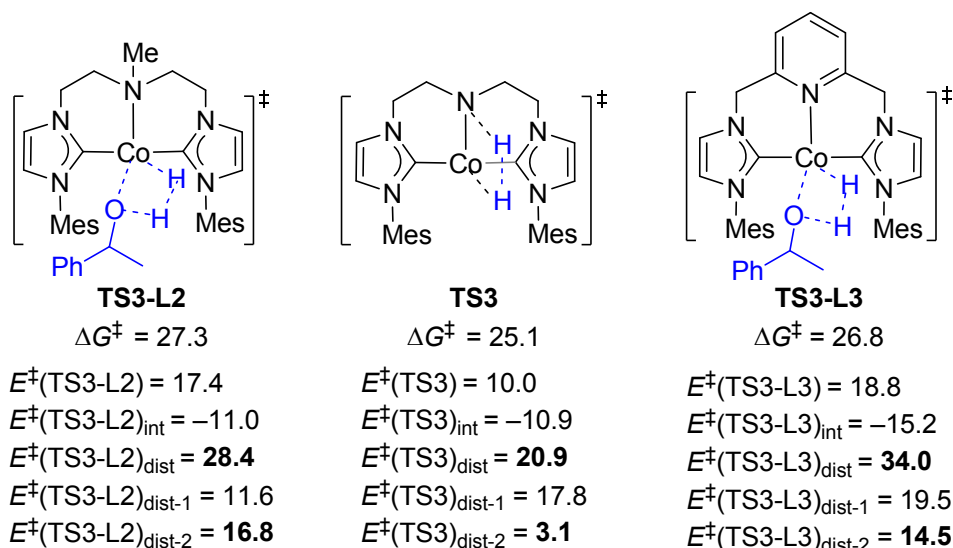

**Figure S4.** Distortion-interaction analysis of transition states **TS3-L2**, **TS3**, and **TS3-L3**.

Distortion-interaction analysis on **TS3-L2** and **TS3** reveals that the interaction energies between the H–H part (fragment 1) and the Co/L part (fragment 2) are nearly the same for these two transition states (Figure S4). Whereas the distortion energy of **TS3-L2** is higher than that of **TS3** by 7.5 kcal/mol and most of the increased distortion in **TS3-L2** originates from the Co/L part (fragment 2). Distortion-interaction analysis of **TS3-L3** shows that the  $E^\ddagger_{\text{dist-2}}$  of **TS3-L3** is 14.5 kcal/mol, which is higher than that in **TS3** by 11.4 kcal/mol. Meanwhile the variation of interaction in interaction energy is 4.3 kcal/mol. Therefore, the higher energy barrier of **TS3-L3** with respect to **TS3** is also attributed to the increased distortion of phenylethoxyl-Co/L fragment like **TS3-L2**. A conclusion could be drawn that ligand **L2** and **L3** have the same critical deficiency that the lack of N–H group on backbone suppresses the regeneration of active cobalt catalyst, thereby leading to the low reactivity of **L2** and **L3**.

## 5. Free energy profiles of pincer cobalt(I)-catalyzed hydrogenation of acetophenone with phosphine ligand L5

As a comparison, phosphine ligands **L4** and **L5** involved hydrogenation of acetophenone are also considered in calculation although no reactivity was observed for them in the experiment. The complete free energy profile with **L5** are shown in Figure S5. Computational studies confirm ligands **L4** and **L5** involved hydrogenation of acetophenone follow exactly the same reaction pathway as **L1** and the catalyst regeneration transition states have the same structure as **TS3**. The catalyst regeneration is still the rate-determining step. For both ligands **L4** and **L5**, the relative weak coordination ability results in the higher energy barrier for catalyst regeneration, thereby restricts their reactivity in this cobalt(I)-catalyzed ketone hydrogenation reaction.

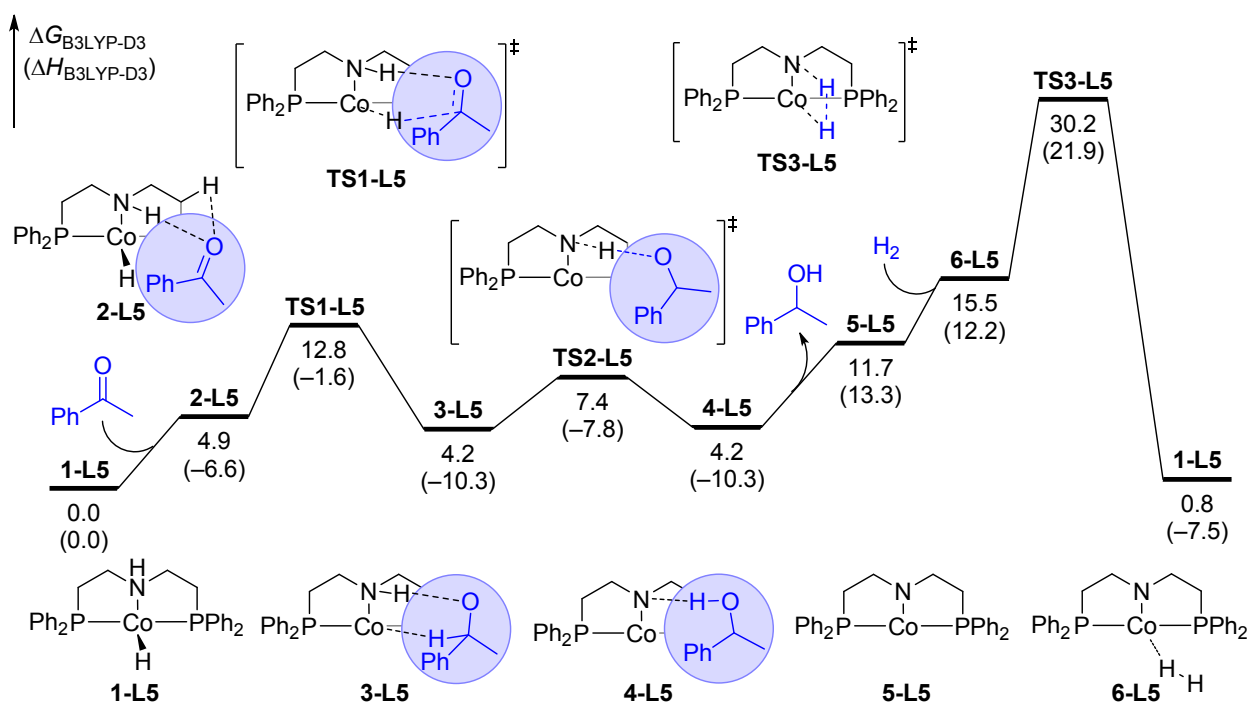

**Figure S5.** Free energy profile of pincer cobalt(I)-catalyzed hydrogenation of acetophenone with phosphine ligand **L5**.

## 6. Free energy profiles of L4 and L5 involved catalyst regeneration with ammonia borane as the hydrogen donor

To provide further advice on improving the efficiency of phosphine ligands, another widely used hydrogen donor, ammonia borane ( $\text{H}_3\text{N-BH}_3$ ), was employed to replace  $\text{H}_2$  for the calculation of L4 and L5 involved catalyst regeneration. As shown in Figure S6a, the interaction of cobalt complex 5 with ammonia borane leads to the formation of protonation intermediate 7-L4 directly. The corresponding protonation transition state is not obtained. This protonation step is most likely a barrier-free process because this step is highly exergonic by 17.1 kcal/mol. Subsequent hydride transfer occurs through transition state TS4-L4, regenerating the active cobalt hydride 1-L4. The activation free energy of this step is only 5.6 kcal/mol, which is much lower than that with  $\text{H}_2$  (TS3-L4, 29.2 kcal/mol). Ligand L5 involved catalyst regeneration with ammonia borane follows the same pathway as L4. The corresponding activation free energy for catalyst regeneration is only 6.3 kcal/mol (Figure S6b), which is also much lower than that of TS3-L5 (Figure S5, 30.2 kcal/mol). Therefore, DFT calculation indicates that using ammonia borane ( $\text{H}_3\text{N-BH}_3$ ) instead of  $\text{H}_2$  as the hydrogen donor could greatly promote the catalyst regeneration in phosphine ligands (L4 and L5) involved ketone hydrogenation reactions.

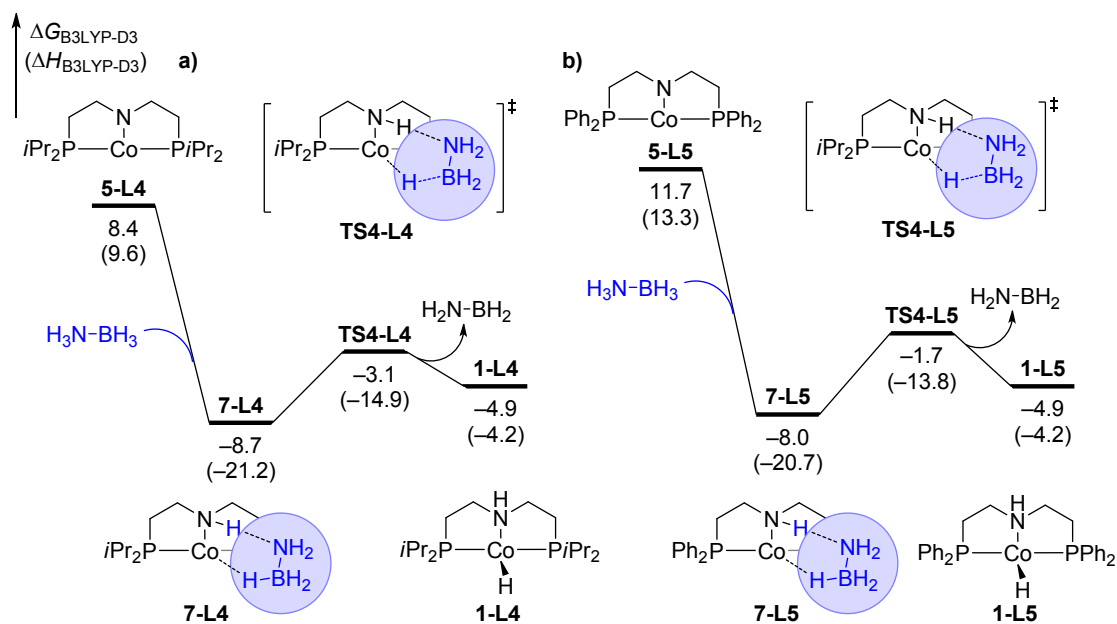

**Figure S6.** Free energy profile of **L4** and **L5** involved catalyst regeneration with ammonia borane as the hydrogen donor. All energies are in kcal/mol.

### 7. Intermediates formed through the interaction of H<sub>2</sub> with T-shaped tridentate cobalt(I) complex **5**, **5-L4**, and **5-L5**.

To study the interaction of H<sub>2</sub> with T-shaped tridentate cobalt(I) complex **5**, **5-L4**, and **5-L5**, three different intermediates are obtained in calculation. As shown in Figure S7, not only the end-on bonding structure **6** and side-on bonding structure **6b** are located, the other structure **6c** which contains the N–H interaction is also considered in calculation. Besides cobalt(I) complex **5**, analogous complexes **5-L4** and **5-L5** are also studied to locate the H<sub>2</sub> bonding intermediate. In our calculation, the side-on bonding structure **6b** (**6b-L4** and **6b-L5**) is shown to be a distorted trigonal pyramidal geometry. This result is consistent with Arnold's study that the 16e triplet PNP-CoCl complex possesses a distorted trigonal pyramidal structure (ref. 28: S. S. Rozenel, R. Padilla and J. Arnold, *Inorg. Chem.*, 2013, **52**, 11544-11550.). The computational results show that the formation of these three H<sub>2</sub> bonding intermediates are endergonic and the end-on intermediate **6** (**6-L4** and **6-L5**) has the lowest relative free energy.

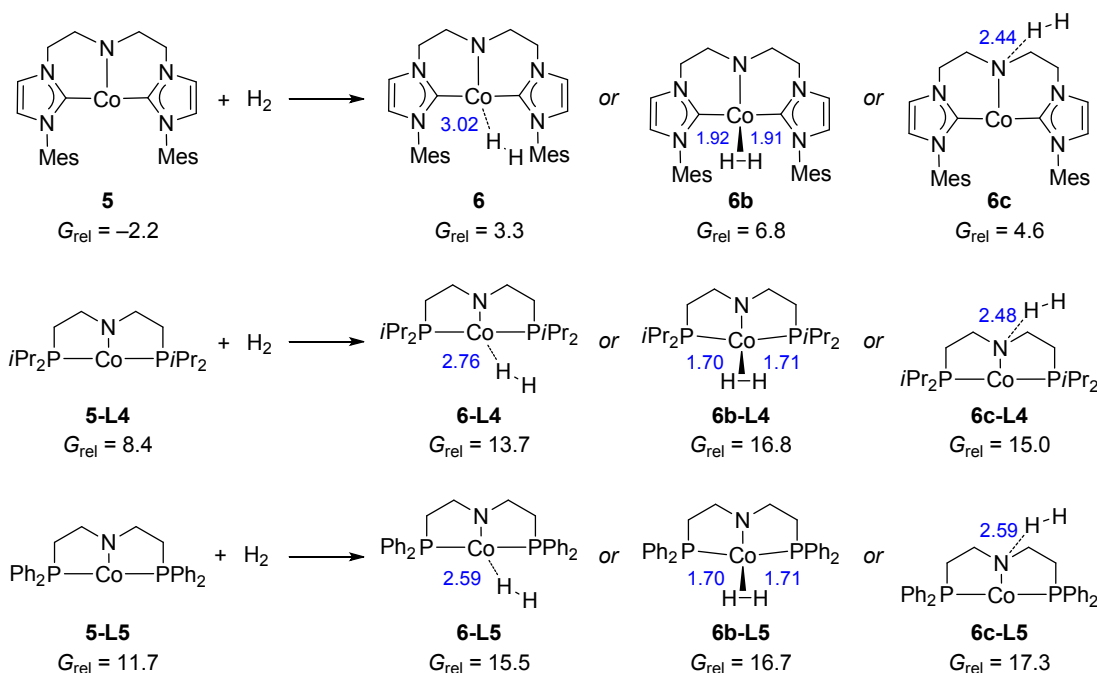



**Figure S7.** Possible intermediates formed through the interaction of H<sub>2</sub> with T-shaped tridentate cobalt(I) complex **5**, **5-L4**, and **5-L5**. All energies are with respect to triplet cobalt(I) hydride complex **1** (**1-L4** or **1-L5**) and are in kcal/mol. The bond lengths are in blue and the unit is Å.

## 8. Cartesian coordinates and energies of optimized structures

### 1

(U)B3LYP-D3(BJ) SCF energy: -1508.38726663 a.u.  
 (U)B3LYP-D3(BJ) enthalpy: -1507.760613 a.u.  
 (U)B3LYP-D3(BJ) free energy: -1507.862682 a.u.  
 (U)B3LYP-D3(BJ) SCF energy in solution: -1508.80217646 a.u.  
 (U)B3LYP-D3(BJ) enthalpy in solution: -1508.175523 a.u.  
 (U)B3LYP-D3(BJ) free energy in solution: -1508.277592 a.u.

### Cartesian coordinates

| ATOM | X         | Y         | Z         |
|------|-----------|-----------|-----------|
| Co   | -1.830076 | -0.187381 | -0.897388 |
| N    | -4.000260 | -0.095751 | -0.160426 |
| C    | -3.799460 | -2.438130 | 0.589065  |
| C    | -4.329548 | -1.041850 | 0.899291  |
| C    | -4.500356 | 1.251036  | 0.104959  |
| C    | -3.858543 | 2.270469  | -0.835256 |
| H    | -5.419803 | -1.112362 | 1.067561  |
| H    | -4.445304 | 3.193791  | -0.830726 |
| H    | -3.842948 | 1.872168  | -1.858628 |
| H    | -4.364207 | -0.426669 | -1.052377 |
| H    | -3.871933 | -0.681086 | 1.827319  |
| H    | -2.130804 | -0.394297 | -2.519089 |
| N    | -2.503016 | 2.612079  | -0.439967 |
| C    | -1.486056 | 1.681654  | -0.317202 |
| C    | -2.061140 | 3.915887  | -0.253289 |

|   |           |           |           |
|---|-----------|-----------|-----------|
| C | -0.735604 | 3.839713  | 0.001396  |
| H | -2.722125 | 4.766318  | -0.321748 |
| H | 0.000929  | 4.602310  | 0.198147  |
| N | -0.399049 | 2.484249  | -0.036787 |
| H | -4.295029 | -3.158751 | 1.246505  |
| H | -4.055227 | -2.704624 | -0.447430 |
| N | -2.368231 | -2.588097 | 0.785649  |
| C | -1.806303 | -3.738581 | 1.332238  |
| C | -1.415090 | -1.738526 | 0.246954  |
| C | -0.469769 | -3.635415 | 1.161620  |
| H | -2.404177 | -4.511050 | 1.791467  |
| H | 0.339461  | -4.293590 | 1.435027  |
| N | -0.243636 | -2.424450 | 0.505004  |
| C | 0.959391  | 2.079313  | 0.163338  |
| C | 1.766732  | 1.805999  | -0.949719 |
| C | 1.481127  | 2.123270  | 1.464336  |
| C | 3.140141  | 1.659804  | -0.736495 |
| C | 2.858950  | 1.965997  | 1.628556  |
| C | 3.707239  | 1.764725  | 0.535703  |
| H | 3.782981  | 1.476655  | -1.593617 |
| H | 3.279377  | 2.019820  | 2.630721  |
| C | 1.065642  | -2.062083 | 0.055927  |
| C | 2.000777  | -1.623609 | 1.003205  |
| C | 1.413668  | -2.277260 | -1.287388 |
| C | 3.323224  | -1.449978 | 0.592334  |
| C | 2.742457  | -2.051653 | -1.658146 |
| C | 3.712963  | -1.659815 | -0.732435 |
| H | 4.061134  | -1.135431 | 1.325009  |
| H | 3.030501  | -2.220058 | -2.693493 |
| C | 1.173998  | 1.713461  | -2.331147 |
| H | 0.428475  | 0.912140  | -2.391191 |

|   |           |           |           |
|---|-----------|-----------|-----------|
| H | 0.654323  | 2.639834  | -2.604193 |
| H | 1.953450  | 1.521907  | -3.074374 |
| C | 5.197815  | 1.642256  | 0.736171  |
| H | 5.742144  | 1.826684  | -0.195363 |
| H | 5.558220  | 2.354377  | 1.486763  |
| H | 5.475679  | 0.638667  | 1.081689  |
| C | 0.572387  | 2.353458  | 2.646159  |
| H | 0.199384  | 3.384491  | 2.681112  |
| H | -0.305773 | 1.701087  | 2.591148  |
| H | 1.098973  | 2.153494  | 3.584075  |
| C | 0.403689  | -2.775886 | -2.287208 |
| H | -0.097088 | -3.680779 | -1.922023 |
| H | -0.383638 | -2.032536 | -2.466845 |
| H | 0.888755  | -3.011071 | -3.239579 |
| C | 1.585573  | -1.358525 | 2.428294  |
| H | 0.670040  | -0.759676 | 2.456616  |
| H | 1.379543  | -2.286315 | 2.976863  |
| H | 2.370134  | -0.814975 | 2.961809  |
| C | 5.142222  | -1.444455 | -1.165368 |
| H | 5.293797  | -0.423874 | -1.539768 |
| H | 5.840086  | -1.591238 | -0.334345 |
| H | 5.423108  | -2.130921 | -1.971207 |
| H | -5.599523 | 1.308512  | 0.017765  |
| H | -4.238295 | 1.512499  | 1.136198  |

2

(U)B3LYP-D3(BJ) SCF energy: -1893.33236423 a.u.

(U)B3LYP-D3(BJ) enthalpy: -1892.555885 a.u.

(U)B3LYP-D3(BJ) free energy: -1892.681273 a.u.

(U)B3LYP-D3(BJ) SCF energy in solution: -1893.85726312 a.u.

(U)B3LYP-D3(BJ) enthalpy in solution: -1893.080784 a.u.

(U)B3LYP-D3(BJ) free energy in solution: -1893.206172 a.u.

#### Cartesian coordinates

| ATOM | X         | Y         | Z         |
|------|-----------|-----------|-----------|
| Co   | -0.836467 | 0.256757  | -0.090857 |
| N    | -2.645842 | 0.327087  | -1.513835 |
| C    | -2.092546 | 2.654333  | -2.134266 |
| C    | -2.459751 | 1.259859  | -2.626641 |
| C    | -3.086824 | -0.989795 | -1.983961 |
| C    | -2.866748 | -2.063780 | -0.922602 |
| H    | -3.375082 | 1.343244  | -3.238843 |
| H    | -3.470340 | -2.945297 | -1.156912 |
| H    | -3.176354 | -1.689988 | 0.057434  |
| H    | -3.373720 | 0.713521  | -0.915415 |
| H    | -1.658945 | 0.873307  | -3.266289 |
| H    | -1.345902 | 0.378581  | 1.495142  |
| N    | -1.477040 | -2.487979 | -0.855710 |
| C    | -0.428909 | -1.617289 | -0.622220 |
| C    | -1.068764 | -3.812861 | -0.922628 |
| C    | 0.270929  | -3.812997 | -0.736897 |
| H    | -1.761128 | -4.622965 | -1.093820 |
| H    | 0.991048  | -4.615126 | -0.707401 |
| N    | 0.647654  | -2.479158 | -0.558777 |
| H    | -2.248867 | 3.368900  | -2.948366 |
| H    | -2.757357 | 2.936749  | -1.308748 |
| N    | -0.701521 | 2.778023  | -1.719249 |
| C    | 0.042012  | 3.931051  | -1.942606 |
| C    | -0.024561 | 1.852492  | -0.948405 |
| C    | 1.228209  | 3.754568  | -1.317514 |

|   |           |           |           |
|---|-----------|-----------|-----------|
| H | -0.337526 | 4.758493  | -2.522457 |
| H | 2.097146  | 4.387943  | -1.235622 |
| N | 1.176071  | 2.495874  | -0.718992 |
| C | 2.015380  | -2.152731 | -0.291460 |
| C | 2.431743  | -1.979605 | 1.036127  |
| C | 2.926537  | -2.175579 | -1.356849 |
| C | 3.805414  | -1.908229 | 1.283003  |
| C | 4.289345  | -2.095398 | -1.061940 |
| C | 4.747463  | -1.991791 | 0.254857  |
| H | 4.144916  | -1.803247 | 2.310362  |
| H | 5.008078  | -2.133760 | -1.877990 |
| C | 2.247993  | 2.026013  | 0.104570  |
| C | 3.400622  | 1.528006  | -0.517791 |
| C | 2.169106  | 2.197117  | 1.495003  |
| C | 4.508348  | 1.241189  | 0.280754  |
| C | 3.292219  | 1.861192  | 2.256573  |
| C | 4.472978  | 1.401039  | 1.668345  |
| H | 5.415349  | 0.878683  | -0.194320 |
| H | 3.249878  | 1.992852  | 3.335579  |
| C | 1.427627  | -1.916068 | 2.156851  |
| H | 0.722252  | -1.088919 | 2.012014  |
| H | 0.826273  | -2.832632 | 2.201978  |
| H | 1.931020  | -1.785437 | 3.119510  |
| C | 6.226700  | -1.949236 | 0.550345  |
| H | 6.434903  | -2.236130 | 1.586072  |
| H | 6.783873  | -2.624817 | -0.107955 |
| H | 6.637224  | -0.942195 | 0.404303  |
| C | 2.437203  | -2.305567 | -2.777601 |
| H | 2.031411  | -3.304640 | -2.979031 |
| H | 1.630740  | -1.591249 | -2.975366 |
| H | 3.250075  | -2.121401 | -3.486345 |

|   |           |           |           |
|---|-----------|-----------|-----------|
| C | 0.926855  | 2.750465  | 2.141005  |
| H | 0.614601  | 3.686399  | 1.662500  |
| H | 0.093349  | 2.043485  | 2.038802  |
| H | 1.098257  | 2.945803  | 3.204284  |
| C | 3.436224  | 1.322989  | -2.010863 |
| H | 2.554328  | 0.765255  | -2.341182 |
| H | 3.435971  | 2.275766  | -2.555039 |
| H | 4.328724  | 0.762475  | -2.301918 |
| C | 5.672055  | 1.062241  | 2.519297  |
| H | 5.639377  | 0.016702  | 2.851680  |
| H | 6.607889  | 1.196427  | 1.966459  |
| H | 5.714354  | 1.687949  | 3.417113  |
| H | -4.149129 | -0.976372 | -2.277856 |
| H | -2.500110 | -1.251786 | -2.871057 |
| C | -4.330300 | 1.652810  | 1.172946  |
| O | -4.529419 | 2.215405  | 0.095280  |
| C | -4.778660 | 0.240983  | 1.358591  |
| C | -4.222574 | -0.591010 | 2.340976  |
| C | -5.741009 | -0.277446 | 0.478266  |
| C | -4.634951 | -1.920126 | 2.444360  |
| H | -3.437904 | -0.216318 | 2.986491  |
| C | -6.158776 | -1.600407 | 0.589773  |
| H | -6.149410 | 0.378556  | -0.283729 |
| C | -5.605248 | -2.423811 | 1.576344  |
| H | -4.189064 | -2.564559 | 3.196208  |
| H | -6.913844 | -1.991549 | -0.086389 |
| H | -5.927389 | -3.457906 | 1.663788  |
| C | -3.570307 | 2.327322  | 2.278814  |
| H | -2.559419 | 1.883648  | 2.267599  |
| H | -3.498592 | 3.397060  | 2.073392  |
| H | -4.016445 | 2.152227  | 3.262851  |

### 3

(U)B3LYP-D3(BJ) SCF energy: -1893.36307345 a.u.  
(U)B3LYP-D3(BJ) enthalpy: -1892.583170 a.u.  
(U)B3LYP-D3(BJ) free energy: -1892.705376 a.u.  
(U)B3LYP-D3(BJ) SCF energy in solution: -1893.88688292 a.u.  
(U)B3LYP-D3(BJ) enthalpy in solution: -1893.106979 a.u.  
(U)B3LYP-D3(BJ) free energy in solution: -1893.229185 a.u.

#### Cartesian coordinates

| ATOM | X         | Y         | Z         |
|------|-----------|-----------|-----------|
| Co   | -0.664265 | 0.652679  | -0.734142 |
| N    | -2.482003 | 1.265102  | -1.675747 |
| C    | -2.176970 | 3.627787  | -1.121317 |
| C    | -2.439378 | 2.612175  | -2.232705 |
| C    | -3.077412 | 0.281999  | -2.570808 |
| C    | -3.337591 | -1.022642 | -1.818321 |
| H    | -3.407409 | 2.884443  | -2.691606 |
| H    | -3.990089 | -1.669479 | -2.411055 |
| H    | -3.837470 | -0.794422 | -0.874512 |
| H    | -3.114600 | 1.313152  | -0.769088 |
| H    | -1.672522 | 2.692126  | -3.017935 |
| H    | -1.852671 | 0.777059  | 0.989950  |
| N    | -2.115952 | -1.788366 | -1.551412 |
| C    | -0.937523 | -1.236559 | -1.136658 |
| C    | -2.009896 | -3.158351 | -1.736113 |
| C    | -0.724786 | -3.493077 | -1.462985 |
| H    | -2.850655 | -3.763932 | -2.036146 |
| H    | -0.208001 | -4.438510 | -1.495944 |

|   |           |           |           |
|---|-----------|-----------|-----------|
| N | -0.081294 | -2.309535 | -1.105838 |
| H | -2.373643 | 4.639699  | -1.486261 |
| H | -2.852638 | 3.394663  | -0.288580 |
| N | -0.793983 | 3.614744  | -0.625450 |
| C | -0.105772 | 4.752621  | -0.230171 |
| C | -0.084075 | 2.476721  | -0.364212 |
| C | 1.079863  | 4.336850  | 0.284197  |
| H | -0.515491 | 5.743437  | -0.351499 |
| H | 1.913604  | 4.881949  | 0.697182  |
| N | 1.078014  | 2.948630  | 0.188894  |
| C | 1.335919  | -2.221430 | -0.912763 |
| C | 1.908645  | -2.777094 | 0.237307  |
| C | 2.122675  | -1.650954 | -1.929948 |
| C | 3.304808  | -2.788985 | 0.338182  |
| C | 3.508690  | -1.678876 | -1.779610 |
| C | 4.119599  | -2.262560 | -0.663792 |
| H | 3.760890  | -3.232474 | 1.220188  |
| H | 4.128910  | -1.250848 | -2.564043 |
| C | 2.112584  | 2.103785  | 0.711623  |
| C | 3.183642  | 1.738734  | -0.111522 |
| C | 2.021393  | 1.684776  | 2.047602  |
| C | 4.202001  | 0.961139  | 0.446385  |
| C | 3.055796  | 0.898491  | 2.556983  |
| C | 4.156662  | 0.534273  | 1.775231  |
| H | 5.047235  | 0.681486  | -0.175908 |
| H | 3.002872  | 0.568783  | 3.592104  |
| H | -4.051913 | 0.633211  | -2.956421 |
| H | -2.430101 | 0.096609  | -3.441335 |
| C | -2.923976 | 0.816827  | 1.397627  |
| O | -3.786854 | 1.408361  | 0.534167  |
| C | -3.256836 | -0.653363 | 1.694671  |



|   |           |           |           |
|---|-----------|-----------|-----------|
| C | -2.283061 | -1.558102 | 2.132694  |
| C | -4.562229 | -1.115673 | 1.505435  |
| C | -2.599815 | -2.897008 | 2.365127  |
| H | -1.263413 | -1.204912 | 2.276670  |
| C | -4.887286 | -2.453761 | 1.737375  |
| H | -5.296182 | -0.399506 | 1.148465  |
| C | -3.906037 | -3.351677 | 2.163666  |
| H | -1.829877 | -3.589064 | 2.698478  |
| H | -5.907347 | -2.798821 | 1.582781  |
| H | -4.155053 | -4.395298 | 2.338990  |
| C | -2.813196 | 1.600120  | 2.725761  |
| H | -2.144113 | 1.121303  | 3.452432  |
| H | -2.450014 | 2.613956  | 2.520328  |
| H | -3.811476 | 1.677663  | 3.171203  |
| C | 1.050418  | -3.366693 | 1.327405  |
| H | 0.752258  | -4.397416 | 1.095389  |
| H | 1.593257  | -3.386547 | 2.277131  |
| H | 0.130927  | -2.792706 | 1.458536  |
| C | 1.494593  | -1.047841 | -3.160848 |
| H | 0.770991  | -1.732398 | -3.617592 |
| H | 0.944673  | -0.131092 | -2.916048 |
| H | 2.258846  | -0.803565 | -3.904339 |
| C | 5.623689  | -2.339342 | -0.571099 |
| H | 5.947256  | -2.705809 | 0.407146  |
| H | 6.030464  | -3.016342 | -1.332787 |
| H | 6.087368  | -1.359431 | -0.733030 |
| C | 0.834123  | 2.063235  | 2.892483  |
| H | 0.704564  | 3.150290  | 2.948468  |
| H | -0.088541 | 1.658939  | 2.466066  |
| H | 0.940035  | 1.678070  | 3.910496  |
| C | 3.222153  | 2.156321  | -1.558917 |

|   |          |           |           |
|---|----------|-----------|-----------|
| H | 3.169682 | 3.245347  | -1.671090 |
| H | 4.138827 | 1.804663  | -2.040715 |
| H | 2.367207 | 1.739446  | -2.103159 |
| C | 5.254425 | -0.319719 | 2.359009  |
| H | 4.945678 | -1.371309 | 2.406060  |
| H | 6.165547 | -0.271000 | 1.755407  |
| H | 5.503576 | -0.007518 | 3.379131  |

4

(U)B3LYP-D3(BJ) SCF energy: -1893.36621610 a.u.

(U)B3LYP-D3(BJ) enthalpy: -1892.585246 a.u.

(U)B3LYP-D3(BJ) free energy: -1892.708727 a.u.

(U)B3LYP-D3(BJ) SCF energy in solution: -1893.88536309 a.u.

(U)B3LYP-D3(BJ) enthalpy in solution: -1893.104393 a.u.

(U)B3LYP-D3(BJ) free energy in solution: -1893.227874 a.u.

Cartesian coordinates

| ATOM | X         | Y         | Z         |
|------|-----------|-----------|-----------|
| Co   | -0.659354 | 0.510638  | -0.893117 |
| N    | -2.441443 | 0.907060  | -1.779430 |
| C    | -2.261475 | 3.368310  | -1.640586 |
| C    | -2.499664 | 2.146045  | -2.525019 |
| C    | -3.073821 | -0.166991 | -2.510151 |
| C    | -3.213146 | -1.427456 | -1.658974 |
| H    | -3.505927 | 2.303229  | -2.965281 |
| H    | -3.837976 | -2.160980 | -2.177348 |
| H    | -3.689901 | -1.179587 | -0.708470 |
| H    | -3.347183 | 1.211083  | -0.355075 |
| H    | -1.792056 | 2.177453  | -3.379382 |

|   |           |           |           |
|---|-----------|-----------|-----------|
| H | -1.948062 | 1.048387  | 1.303790  |
| N | -1.931737 | -2.085908 | -1.388638 |
| C | -0.787817 | -1.418228 | -1.055578 |
| C | -1.735410 | -3.455891 | -1.448338 |
| C | -0.426106 | -3.678992 | -1.174121 |
| H | -2.537025 | -4.140742 | -1.676714 |
| H | 0.155624  | -4.586224 | -1.141723 |
| N | 0.140619  | -2.426803 | -0.937864 |
| H | -2.414702 | 4.281744  | -2.224407 |
| H | -2.975325 | 3.350141  | -0.810508 |
| N | -0.908748 | 3.451340  | -1.072494 |
| C | -0.292641 | 4.650929  | -0.747200 |
| C | -0.184763 | 2.375065  | -0.641211 |
| C | 0.860808  | 4.341472  | -0.102520 |
| H | -0.723118 | 5.605856  | -1.006647 |
| H | 1.643005  | 4.960609  | 0.307118  |
| N | 0.912380  | 2.951628  | -0.048971 |
| C | 1.550022  | -2.228777 | -0.774940 |
| C | 2.159353  | -2.586190 | 0.435793  |
| C | 2.294974  | -1.744268 | -1.862314 |
| C | 3.550024  | -2.488562 | 0.527622  |
| C | 3.680911  | -1.647393 | -1.716530 |
| C | 4.327548  | -2.031376 | -0.538719 |
| H | 4.034851  | -2.776294 | 1.457238  |
| H | 4.269898  | -1.275534 | -2.551780 |
| C | 1.933656  | 2.211641  | 0.631210  |
| C | 3.046978  | 1.759829  | -0.087713 |
| C | 1.793946  | 1.985811  | 2.008832  |
| C | 4.052705  | 1.091928  | 0.615105  |
| C | 2.817216  | 1.299357  | 2.665961  |
| C | 3.955103  | 0.851689  | 1.987572  |

|   |           |           |           |
|---|-----------|-----------|-----------|
| H | 4.929909  | 0.749431  | 0.074929  |
| H | 2.726301  | 1.118538  | 3.734695  |
| H | -4.104358 | 0.105603  | -2.818777 |
| H | -2.541207 | -0.433868 | -3.447576 |
| C | -3.018808 | 0.952879  | 1.558912  |
| O | -3.803865 | 1.483908  | 0.514303  |
| C | -3.290325 | -0.530073 | 1.774120  |
| C | -2.241757 | -1.424401 | 2.007079  |
| C | -4.598171 | -1.025981 | 1.710540  |
| C | -2.485925 | -2.789752 | 2.163274  |
| H | -1.223944 | -1.044099 | 2.034018  |
| C | -4.848954 | -2.388459 | 1.870806  |
| H | -5.406061 | -0.332875 | 1.496592  |
| C | -3.792078 | -3.276367 | 2.092655  |
| H | -1.657061 | -3.473506 | 2.323960  |
| H | -5.868455 | -2.761738 | 1.813396  |
| H | -3.986253 | -4.339635 | 2.206983  |
| C | -3.291776 | 1.761114  | 2.828049  |
| H | -2.702353 | 1.384359  | 3.671734  |
| H | -3.041179 | 2.813955  | 2.658695  |
| H | -4.353155 | 1.697621  | 3.092730  |
| C | 1.337311  | -3.045133 | 1.613176  |
| H | 0.769277  | -3.955148 | 1.390423  |
| H | 1.976529  | -3.245529 | 2.477672  |
| H | 0.607964  | -2.279049 | 1.894844  |
| C | 1.623646  | -1.350778 | -3.153304 |
| H | 0.983468  | -2.156381 | -3.530879 |
| H | 0.973225  | -0.479261 | -3.009357 |
| H | 2.367012  | -1.110625 | -3.918971 |
| C | 5.831792  | -1.974221 | -0.431328 |
| H | 6.154471  | -1.840838 | 0.605786  |

|   |           |           |           |
|---|-----------|-----------|-----------|
| H | 6.290396  | -2.900924 | -0.800575 |
| H | 6.244768  | -1.151444 | -1.025033 |
| C | 0.573020  | 2.467031  | 2.750395  |
| H | 0.451532  | 3.553425  | 2.669567  |
| H | -0.336811 | 2.018647  | 2.338838  |
| H | 0.634410  | 2.207992  | 3.811165  |
| C | 3.142575  | 1.978421  | -1.575299 |
| H | 3.065146  | 3.040466  | -1.834967 |
| H | 4.089439  | 1.594230  | -1.964342 |
| H | 2.324657  | 1.464262  | -2.092256 |
| C | 5.039641  | 0.103674  | 2.722636  |
| H | 4.786025  | -0.959897 | 2.816481  |
| H | 5.997063  | 0.167137  | 2.195808  |
| H | 5.181567  | 0.494883  | 3.735786  |

## 5

(U)B3LYP-D3(BJ) SCF energy: -1507.20858049 a.u.

(U)B3LYP-D3(BJ) enthalpy: -1506.601523 a.u.

(U)B3LYP-D3(BJ) free energy: -1506.703029 a.u.

(U)B3LYP-D3(BJ) SCF energy in solution: -1507.60740884 a.u.

(U)B3LYP-D3(BJ) enthalpy in solution: -1507.000351 a.u.

(U)B3LYP-D3(BJ) free energy in solution: -1507.101857 a.u.

### Cartesian coordinates

| ATOM | X         | Y         | Z         |
|------|-----------|-----------|-----------|
| Co   | -1.624866 | -0.025745 | -0.316823 |
| N    | -3.568526 | 0.072541  | 0.044850  |
| C    | -3.901110 | -2.350117 | 0.372744  |
| C    | -4.194864 | -0.932549 | 0.859301  |

|   |           |           |           |
|---|-----------|-----------|-----------|
| C | -4.263550 | 1.326181  | 0.119488  |
| C | -3.779320 | 2.307350  | -0.949013 |
| H | -5.301725 | -0.851261 | 0.828494  |
| H | -4.414021 | 3.198654  | -0.971745 |
| H | -3.818768 | 1.815313  | -1.926849 |
| H | -3.927890 | -0.874888 | 1.938934  |
| N | -2.409406 | 2.761127  | -0.707595 |
| C | -1.378777 | 1.885935  | -0.504429 |
| C | -2.016401 | 4.079673  | -0.535833 |
| C | -0.698387 | 4.057431  | -0.214541 |
| H | -2.700049 | 4.905503  | -0.658983 |
| H | -0.000424 | 4.848647  | 0.008179  |
| N | -0.322657 | 2.713922  | -0.202681 |
| H | -4.458337 | -3.076317 | 0.974409  |
| H | -4.224559 | -2.435761 | -0.671821 |
| N | -2.488075 | -2.736012 | 0.445247  |
| C | -2.045969 | -4.020575 | 0.727702  |
| C | -1.460735 | -1.913670 | 0.073329  |
| C | -0.700812 | -4.024156 | 0.547740  |
| H | -2.719568 | -4.806199 | 1.033889  |
| H | 0.036795  | -4.802110 | 0.664510  |
| N | -0.360019 | -2.732506 | 0.152312  |
| C | 0.970307  | 2.266207  | 0.220277  |
| C | 2.033502  | 2.291500  | -0.692152 |
| C | 1.144211  | 1.860720  | 1.551824  |
| C | 3.305790  | 1.949302  | -0.228630 |
| C | 2.433234  | 1.516794  | 1.967450  |
| C | 3.526632  | 1.573728  | 1.099360  |
| H | 4.142489  | 1.977645  | -0.922637 |
| H | 2.585599  | 1.204104  | 2.997824  |
| C | 0.963060  | -2.325279 | -0.214821 |

|   |           |           |           |
|---|-----------|-----------|-----------|
| C | 1.883153  | -2.004396 | 0.790901  |
| C | 1.302877  | -2.281865 | -1.575447 |
| C | 3.184891  | -1.672626 | 0.407771  |
| C | 2.610441  | -1.925252 | -1.911416 |
| C | 3.565607  | -1.626487 | -0.935148 |
| H | 3.913521  | -1.435095 | 1.177478  |
| H | 2.891352  | -1.890051 | -2.961680 |
| C | 1.795890  | 2.659293  | -2.134473 |
| H | 1.044350  | 1.997651  | -2.580122 |
| H | 1.417900  | 3.682977  | -2.238209 |
| H | 2.719513  | 2.575771  | -2.714493 |
| C | 4.918180  | 1.258275  | 1.590926  |
| H | 5.439879  | 2.169260  | 1.912721  |
| H | 4.894356  | 0.578286  | 2.449015  |
| H | 5.525649  | 0.795699  | 0.806795  |
| C | -0.026649 | 1.793209  | 2.498430  |
| H | -0.562235 | 2.748577  | 2.541854  |
| H | -0.754515 | 1.042756  | 2.163284  |
| H | 0.304275  | 1.535516  | 3.508793  |
| C | 0.282754  | -2.601643 | -2.637627 |
| H | -0.202662 | -3.566354 | -2.450879 |
| H | -0.511571 | -1.845675 | -2.650028 |
| H | 0.748697  | -2.634190 | -3.626839 |
| C | 1.466080  | -1.989518 | 2.239103  |
| H | 0.628551  | -1.298932 | 2.388910  |
| H | 1.130887  | -2.975380 | 2.581537  |
| H | 2.294259  | -1.668628 | 2.877053  |
| C | 4.967030  | -1.232429 | -1.331113 |
| H | 5.017309  | -0.163862 | -1.576739 |
| H | 5.679777  | -1.417204 | -0.520919 |
| H | 5.305295  | -1.784830 | -2.214407 |

|   |           |          |           |
|---|-----------|----------|-----------|
| H | -5.353522 | 1.202872 | -0.054983 |
| H | -4.180845 | 1.838908 | 1.106735  |

### TS1

(U)B3LYP-D3(BJ) SCF energy: -1893.33047859 a.u.  
(U)B3LYP-D3(BJ) enthalpy: -1892.555023 a.u.  
(U)B3LYP-D3(BJ) free energy: -1892.676411 a.u.  
(U)B3LYP-D3(BJ) SCF energy in solution: -1893.85366099 a.u.  
(U)B3LYP-D3(BJ) enthalpy in solution: -1893.078205 a.u.  
(U)B3LYP-D3(BJ) free energy in solution: -1893.199593 a.u.  
Imaginary frequency: -72.1858 cm<sup>-1</sup>

### Cartesian coordinates

| ATOM | X         | Y         | Z         |
|------|-----------|-----------|-----------|
| Co   | -0.641426 | 0.376636  | -0.376151 |
| N    | -2.662669 | 1.077689  | -1.061140 |
| C    | -1.505215 | 2.257727  | -2.969815 |
| C    | -2.701242 | 2.198187  | -2.008791 |
| C    | -3.510345 | -0.067429 | -1.404438 |
| C    | -2.925817 | -0.999971 | -2.467647 |
| H    | -3.622567 | 2.170125  | -2.614398 |
| H    | -4.498944 | 0.266092  | -1.766905 |
| H    | -3.671507 | -0.645257 | -0.494006 |
| H    | -2.592548 | -0.429344 | -3.343885 |
| H    | -3.720267 | -1.673850 | -2.803799 |
| H    | -2.940494 | 1.438122  | -0.144173 |
| H    | -1.032504 | 0.306114  | 1.269374  |
| N    | -1.832967 | -1.833498 | -1.989201 |
| C    | -0.747596 | -1.347420 | -1.291494 |



|   |           |           |           |
|---|-----------|-----------|-----------|
| C | -1.706096 | -3.188050 | -2.284674 |
| C | -0.522171 | -3.590788 | -1.765267 |
| H | -2.465889 | -3.735819 | -2.821059 |
| H | -0.040302 | -4.555569 | -1.748657 |
| N | 0.047403  | -2.469357 | -1.162939 |
| N | -0.263659 | 2.613805  | -2.305176 |
| C | 0.520350  | 3.726685  | -2.594260 |
| C | 0.277281  | 1.843337  | -1.305159 |
| C | 1.590303  | 3.672178  | -1.761943 |
| H | 0.251372  | 4.443776  | -3.354698 |
| H | 2.437187  | 4.329470  | -1.643796 |
| N | 1.427326  | 2.526465  | -0.987774 |
| C | 1.350775  | -2.467872 | -0.570280 |
| C | 1.483824  | -2.562089 | 0.822940  |
| C | 2.465984  | -2.390743 | -1.416255 |
| C | 2.775482  | -2.585719 | 1.356070  |
| C | 3.737555  | -2.433906 | -0.839478 |
| C | 3.911053  | -2.534173 | 0.543291  |
| H | 2.894024  | -2.650570 | 2.435378  |
| H | 4.610800  | -2.376473 | -1.485398 |
| C | 2.297342  | 2.102638  | 0.066942  |
| C | 3.413370  | 1.318574  | -0.247168 |
| C | 1.978225  | 2.459827  | 1.383935  |
| C | 4.219220  | 0.875875  | 0.803935  |
| C | 2.806991  | 1.986390  | 2.403880  |
| C | 3.921206  | 1.185416  | 2.133750  |
| H | 5.088265  | 0.264409  | 0.578527  |
| H | 2.572475  | 2.246157  | 3.433745  |
| C | 0.270990  | -2.610150 | 1.711353  |
| H | -0.235032 | -1.635269 | 1.693787  |
| H | -0.452824 | -3.355661 | 1.362876  |

|   |           |           |           |
|---|-----------|-----------|-----------|
| H | 0.551899  | -2.849165 | 2.741941  |
| C | 5.293045  | -2.609036 | 1.145459  |
| H | 6.045350  | -2.181242 | 0.474327  |
| H | 5.343589  | -2.071886 | 2.097845  |
| H | 5.584957  | -3.649212 | 1.341827  |
| C | 2.286904  | -2.239605 | -2.905894 |
| H | 1.840747  | -3.134346 | -3.356377 |
| H | 1.613956  | -1.404036 | -3.129332 |
| H | 3.247173  | -2.055799 | -3.396419 |
| C | 0.775211  | 3.318000  | 1.674854  |
| H | 0.786163  | 4.237741  | 1.078197  |
| H | -0.152176 | 2.787516  | 1.432061  |
| H | 0.745989  | 3.598959  | 2.731826  |
| C | 3.716908  | 0.961814  | -1.679109 |
| H | 2.853202  | 0.478573  | -2.145559 |
| H | 3.950449  | 1.851496  | -2.276810 |
| H | 4.566742  | 0.277311  | -1.737087 |
| C | 4.764323  | 0.637828  | 3.259451  |
| H | 4.355262  | -0.313861 | 3.624631  |
| H | 5.793399  | 0.448872  | 2.936107  |
| H | 4.795028  | 1.325154  | 4.111626  |
| H | -2.717135 | 3.127939  | -1.430459 |
| H | -1.699988 | 3.012496  | -3.738841 |
| H | -1.366103 | 1.290614  | -3.464009 |
| C | -2.616835 | 1.234237  | 2.267445  |
| O | -2.838866 | 2.280219  | 1.635908  |
| C | -3.561250 | 0.071874  | 2.093343  |
| C | -3.219362 | -1.257849 | 2.373439  |
| C | -4.859549 | 0.356914  | 1.648552  |
| C | -4.143900 | -2.280655 | 2.181768  |
| H | -2.211872 | -1.492096 | 2.694931  |

|   |           |           |          |
|---|-----------|-----------|----------|
| C | -5.792776 | -0.665418 | 1.468974 |
| H | -5.115335 | 1.390892  | 1.441178 |
| C | -5.435342 | -1.988792 | 1.726712 |
| H | -3.857542 | -3.309873 | 2.381105 |
| H | -6.796155 | -0.428307 | 1.124820 |
| H | -6.155290 | -2.789344 | 1.579278 |
| C | -1.755958 | 1.249212  | 3.516978 |
| H | -1.342703 | 0.268738  | 3.756561 |
| H | -0.944796 | 1.966710  | 3.401388 |
| H | -2.391988 | 1.570761  | 4.356350 |

## TS2

(U)B3LYP-D3(BJ) SCF energy: -1893.34610099 a.u.  
 (U)B3LYP-D3(BJ) enthalpy: -1892.569772 a.u.  
 (U)B3LYP-D3(BJ) free energy: -1892.693948 a.u.  
 (U)B3LYP-D3(BJ) SCF energy in solution: -1893.87420931 a.u.  
 (U)B3LYP-D3(BJ) enthalpy in solution: -1893.097880 a.u.  
 (U)B3LYP-D3(BJ) free energy in solution: -1893.222056 a.u.  
 Imaginary frequency: -1141.4500 cm<sup>-1</sup>

## Cartesian coordinates

| ATOM | X         | Y         | Z         |
|------|-----------|-----------|-----------|
| Co   | -0.395464 | 0.226198  | -1.070744 |
| N    | -2.316557 | 0.264947  | -1.941279 |
| C    | -2.360900 | 2.707631  | -2.399535 |
| C    | -2.359165 | 1.289797  | -2.969524 |
| C    | -2.757234 | -1.008697 | -2.468046 |
| C    | -2.617736 | -2.155832 | -1.463823 |
| H    | -3.289975 | 1.227469  | -3.568207 |

|   |           |           |           |
|---|-----------|-----------|-----------|
| H | -3.153820 | -3.032881 | -1.837824 |
| H | -3.050328 | -1.875414 | -0.500490 |
| H | -2.873935 | 0.705726  | -0.856169 |
| H | -1.525587 | 1.179644  | -3.688034 |
| H | -4.591625 | 1.465482  | 1.608917  |
| N | -1.227219 | -2.581971 | -1.240699 |
| C | -0.180575 | -1.725300 | -1.082983 |
| C | -0.822718 | -3.903369 | -1.136848 |
| C | 0.521406  | -3.887340 | -0.928873 |
| H | -1.514854 | -4.726665 | -1.221210 |
| H | 1.237421  | -4.684859 | -0.809706 |
| N | 0.892057  | -2.548667 | -0.897833 |
| H | -2.459253 | 3.427386  | -3.219337 |
| H | -3.208466 | 2.807080  | -1.715681 |
| N | -1.162589 | 3.081323  | -1.629189 |
| C | -0.937474 | 4.382068  | -1.202656 |
| C | -0.322736 | 2.207953  | -1.015657 |
| C | 0.072789  | 4.331685  | -0.295151 |
| H | -1.512048 | 5.216148  | -1.574922 |
| H | 0.558552  | 5.103634  | 0.280200  |
| N | 0.437930  | 2.995561  | -0.201729 |
| C | 2.236599  | -2.070375 | -0.740845 |
| C | 2.765579  | -1.925082 | 0.546669  |
| C | 2.973920  | -1.756170 | -1.892211 |
| C | 4.088434  | -1.489382 | 0.662408  |
| C | 4.283534  | -1.302286 | -1.725285 |
| C | 4.857920  | -1.166767 | -0.456927 |
| H | 4.517589  | -1.380307 | 1.654695  |
| H | 4.868467  | -1.050365 | -2.606876 |
| C | 1.313424  | 2.439296  | 0.791167  |
| C | 2.645248  | 2.169231  | 0.463252  |

|   |           |           |           |
|---|-----------|-----------|-----------|
| C | 0.770571  | 2.148033  | 2.054687  |
| C | 3.462198  | 1.623054  | 1.457625  |
| C | 1.622268  | 1.581994  | 3.005813  |
| C | 2.968967  | 1.318771  | 2.727318  |
| H | 4.502228  | 1.414152  | 1.224526  |
| H | 1.222057  | 1.340482  | 3.987973  |
| C | 1.920283  | -2.157693 | 1.771294  |
| H | 1.231307  | -1.315843 | 1.912232  |
| H | 1.315013  | -3.065853 | 1.691883  |
| H | 2.544311  | -2.234874 | 2.666284  |
| C | 6.262552  | -0.638022 | -0.300662 |
| H | 6.703331  | -0.946383 | 0.652808  |
| H | 6.916512  | -0.985472 | -1.107555 |
| H | 6.273289  | 0.460217  | -0.326586 |
| C | 2.353525  | -1.872108 | -3.260378 |
| H | 1.922612  | -2.865879 | -3.427631 |
| H | 1.537145  | -1.147318 | -3.368757 |
| H | 3.094812  | -1.681768 | -4.041734 |
| C | -0.677873 | 2.430919  | 2.366525  |
| H | -0.863006 | 3.511299  | 2.426966  |
| H | -1.357890 | 2.035193  | 1.601714  |
| H | -0.953589 | 1.990153  | 3.328825  |
| C | 3.163213  | 2.398048  | -0.932619 |
| H | 2.718520  | 1.668655  | -1.620714 |
| H | 2.906079  | 3.394586  | -1.307392 |
| H | 4.250367  | 2.281541  | -0.968659 |
| C | 3.859229  | 0.696255  | 3.775319  |
| H | 3.537801  | -0.326463 | 4.010379  |
| H | 4.899712  | 0.649865  | 3.438585  |
| H | 3.833510  | 1.262995  | 4.713460  |
| H | -3.825051 | -0.986036 | -2.768353 |

|   |           |           |           |
|---|-----------|-----------|-----------|
| H | -2.192258 | -1.283016 | -3.378794 |
| C | -4.203498 | 0.729441  | 0.878014  |
| O | -3.176626 | 1.314710  | 0.155147  |
| C | -3.741357 | -0.484532 | 1.701285  |
| C | -2.394166 | -0.862693 | 1.699893  |
| C | -4.637065 | -1.239785 | 2.472721  |
| C | -1.957326 | -1.978987 | 2.416196  |
| H | -1.694429 | -0.274929 | 1.113275  |
| C | -4.205591 | -2.351290 | 3.196916  |
| H | -5.686243 | -0.956350 | 2.510334  |
| C | -2.861281 | -2.731615 | 3.166211  |
| H | -0.907877 | -2.257742 | 2.385689  |
| H | -4.919708 | -2.923331 | 3.784550  |
| H | -2.524498 | -3.600429 | 3.726159  |
| C | -5.390374 | 0.348764  | -0.036078 |
| H | -5.697479 | 1.233247  | -0.604477 |
| H | -5.093557 | -0.428044 | -0.750390 |
| H | -6.257508 | -0.021810 | 0.522786  |

### TS3

(U)B3LYP-D3(BJ) SCF energy: -1508.36489454 a.u.

(U)B3LYP-D3(BJ) enthalpy: -1507.744005 a.u.

(U)B3LYP-D3(BJ) free energy: -1507.845927 a.u.

(U)B3LYP-D3(BJ) SCF energy in solution: -1508.77063349 a.u.

(U)B3LYP-D3(BJ) enthalpy in solution: -1508.149744 a.u.

(U)B3LYP-D3(BJ) free energy in solution: -1508.251666 a.u.

Imaginary frequency: -1231.8340 cm<sup>-1</sup>

Cartesian coordinates

| ATOM | X         | Y         | Z         |
|------|-----------|-----------|-----------|
| Co   | -1.551232 | -0.056731 | -0.403564 |
| N    | -3.716026 | 0.007873  | -0.028037 |
| C    | -3.842408 | -2.411855 | 0.407655  |
| C    | -4.225868 | -0.997887 | 0.850867  |
| C    | -4.329837 | 1.289535  | 0.131409  |
| C    | -3.805086 | 2.294525  | -0.902923 |
| H    | -5.336296 | -0.992060 | 0.884699  |
| H    | -4.436692 | 3.187257  | -0.910648 |
| H    | -3.830641 | 1.840368  | -1.898444 |
| H    | -3.891020 | -0.859905 | 1.902076  |
| N    | -2.441317 | 2.740327  | -0.624670 |
| C    | -1.389475 | 1.879660  | -0.457133 |
| C    | -2.069733 | 4.062309  | -0.422950 |
| C    | -0.747957 | 4.056268  | -0.118643 |
| H    | -2.769284 | 4.878401  | -0.518245 |
| H    | -0.060989 | 4.854701  | 0.112592  |
| N    | -0.349485 | 2.720714  | -0.144232 |
| H    | -4.388521 | -3.142310 | 1.012533  |
| H    | -4.136441 | -2.544092 | -0.640726 |
| N    | -2.421292 | -2.741926 | 0.532258  |
| C    | -1.959105 | -4.010262 | 0.864759  |
| C    | -1.401360 | -1.915805 | 0.141813  |
| C    | -0.613858 | -3.997165 | 0.695305  |
| H    | -2.622330 | -4.796711 | 1.190724  |
| H    | 0.134713  | -4.759655 | 0.841023  |
| N    | -0.290250 | -2.713697 | 0.260396  |
| C    | 0.963818  | 2.287243  | 0.229091  |
| C    | 1.980624  | 2.282051  | -0.734451 |
| C    | 1.201395  | 1.924513  | 1.562401  |
| C    | 3.274760  | 1.958782  | -0.320049 |

|   |           |           |           |
|---|-----------|-----------|-----------|
| C | 2.509713  | 1.600060  | 1.929292  |
| C | 3.560515  | 1.632377  | 1.008581  |
| H | 4.077159  | 1.963566  | -1.053852 |
| H | 2.711808  | 1.320927  | 2.960758  |
| C | 1.020946  | -2.307713 | -0.148805 |
| C | 1.964188  | -1.957382 | 0.824764  |
| C | 1.323734  | -2.295649 | -1.519430 |
| C | 3.253778  | -1.627929 | 0.400684  |
| C | 2.620227  | -1.938133 | -1.896219 |
| C | 3.598667  | -1.611441 | -0.952588 |
| H | 4.000742  | -1.368819 | 1.145481  |
| H | 2.873950  | -1.927527 | -2.953901 |
| C | 1.670088  | 2.598780  | -2.174842 |
| H | 0.907069  | 1.913732  | -2.561596 |
| H | 1.273664  | 3.614187  | -2.291708 |
| H | 2.566152  | 2.507637  | -2.795421 |
| C | 4.975692  | 1.342854  | 1.445332  |
| H | 5.553047  | 0.867462  | 0.646551  |
| H | 5.500464  | 2.266879  | 1.721849  |
| H | 4.997322  | 0.683976  | 2.319821  |
| C | 0.072523  | 1.875247  | 2.559837  |
| H | -0.461552 | 2.830983  | 2.611627  |
| H | -0.666666 | 1.118078  | 2.270394  |
| H | 0.445753  | 1.633351  | 3.559232  |
| C | 0.282119  | -2.656441 | -2.547244 |
| H | -0.181119 | -3.624321 | -2.322232 |
| H | -0.525708 | -1.914743 | -2.561639 |
| H | 0.726804  | -2.711026 | -3.545355 |
| C | 1.584258  | -1.909205 | 2.282563  |
| H | 0.744792  | -1.221875 | 2.436650  |
| H | 1.267365  | -2.888590 | 2.659392  |



|   |           |           |           |
|---|-----------|-----------|-----------|
| H | 2.425475  | -1.564666 | 2.890469  |
| C | 4.987618  | -1.221978 | -1.394908 |
| H | 5.024688  | -0.163205 | -1.682266 |
| H | 5.720107  | -1.371451 | -0.595104 |
| H | 5.310118  | -1.804763 | -2.264527 |
| H | -5.433017 | 1.245165  | 0.003665  |
| H | -4.160818 | 1.726468  | 1.140214  |
| H | -2.512513 | -0.417439 | -1.994772 |
| H | -3.195575 | -0.293442 | -1.258093 |

## L1

(U)B3LYP-D3(BJ) SCF energy: -1361.84340084 a.u.

(U)B3LYP-D3(BJ) enthalpy: -1361.225988 a.u.

(U)B3LYP-D3(BJ) free energy: -1361.336944 a.u.

(U)B3LYP-D3(BJ) SCF energy in solution: -1362.27977556 a.u.

(U)B3LYP-D3(BJ) enthalpy in solution: -1361.662363 a.u.

(U)B3LYP-D3(BJ) free energy in solution: -1361.773319 a.u.

## Cartesian coordinates

| ATOM | X         | Y         | Z         |
|------|-----------|-----------|-----------|
| N    | 0.000055  | -2.563426 | -0.456454 |
| C    | 2.447994  | -2.567998 | -0.606931 |
| C    | 1.217707  | -1.962659 | 0.071913  |
| C    | -1.217544 | -1.962606 | 0.071974  |
| C    | -2.447894 | -2.567906 | -0.606794 |
| H    | 1.317010  | -2.059037 | 1.170742  |
| H    | -2.479505 | -3.654225 | -0.452927 |
| H    | -2.408217 | -2.373260 | -1.679229 |
| H    | 0.000038  | -3.560240 | -0.239989 |

|   |           |           |           |
|---|-----------|-----------|-----------|
| H | 1.203913  | -0.889747 | -0.150467 |
| N | -3.678626 | -1.986279 | -0.095387 |
| C | -4.241946 | -0.870410 | -0.656396 |
| C | -4.329260 | -2.415288 | 1.060313  |
| C | -5.362504 | -1.558058 | 1.248215  |
| H | -4.012906 | -3.277599 | 1.628106  |
| H | -6.129851 | -1.517122 | 2.005917  |
| N | -5.290039 | -0.637442 | 0.200696  |
| H | 2.479581  | -3.654317 | -0.453063 |
| H | 2.408247  | -2.373357 | -1.679365 |
| N | 3.678774  | -1.986410 | -0.095596 |
| C | 4.329512  | -2.415512 | 1.060015  |
| C | 4.241974  | -0.870429 | -0.656493 |
| C | 5.362724  | -1.558250 | 1.247940  |
| H | 4.013263  | -3.277926 | 1.627711  |
| H | 6.130145  | -1.517386 | 2.005569  |
| N | 5.290131  | -0.637507 | 0.200535  |
| C | -6.210427 | 0.447851  | 0.035088  |
| C | -7.477738 | 0.192019  | -0.503720 |
| C | -5.816714 | 1.736471  | 0.422630  |
| C | -8.367194 | 1.262956  | -0.632718 |
| C | -6.735558 | 2.777348  | 0.271647  |
| C | -8.014690 | 2.560253  | -0.251364 |
| H | -9.354744 | 1.078806  | -1.049775 |
| H | -6.444395 | 3.782354  | 0.569056  |
| C | 6.210406  | 0.447895  | 0.035029  |
| C | 5.816368  | 1.736530  | 0.422174  |
| C | 7.477949  | 0.192159  | -0.503304 |
| C | 6.735100  | 2.777526  | 0.271260  |
| C | 8.367273  | 1.263205  | -0.632234 |
| C | 8.014430  | 2.560536  | -0.251286 |

|   |            |           |           |
|---|------------|-----------|-----------|
| H | 6.443678   | 3.782544  | 0.568372  |
| H | 9.354993   | 1.079118  | -1.048917 |
| C | -7.855077  | -1.197157 | -0.953483 |
| H | -7.087437  | -1.609022 | -1.617645 |
| H | -7.946633  | -1.890117 | -0.108400 |
| H | -8.810250  | -1.187615 | -1.486370 |
| C | -8.977497  | 3.709080  | -0.432348 |
| H | -10.015930 | 3.362495  | -0.447310 |
| H | -8.876296  | 4.446502  | 0.371301  |
| H | -8.793617  | 4.233817  | -1.379165 |
| C | -4.434471  | 1.980050  | 0.972081  |
| H | -4.263401  | 1.405373  | 1.890658  |
| H | -3.675645  | 1.656642  | 0.251900  |
| H | -4.283947  | 3.039767  | 1.197461  |
| C | 7.855687   | -1.197037 | -0.952683 |
| H | 7.947205   | -1.889815 | -0.107448 |
| H | 7.088299   | -1.609211 | -1.616946 |
| H | 8.810983   | -1.187393 | -1.485348 |
| C | 4.433932   | 1.980038  | 0.971170  |
| H | 3.675356   | 1.656744  | 0.250675  |
| H | 4.262534   | 1.405208  | 1.889590  |
| H | 4.283346   | 3.039721  | 1.196665  |
| C | 8.977121   | 3.709462  | -0.432255 |
| H | 8.794653   | 4.232797  | -1.380123 |
| H | 8.874305   | 4.447960  | 0.370191  |
| H | 10.015708  | 3.363236  | -0.445007 |
| H | -1.316788  | -2.058965 | 1.170810  |
| H | -1.203723  | -0.889697 | -0.150421 |

### 1-singlet

(U)B3LYP-D3(BJ) SCF energy: -1508.37195529 a.u.  
(U)B3LYP-D3(BJ) enthalpy: -1507.742869 a.u.  
(U)B3LYP-D3(BJ) free energy: -1507.843431 a.u.  
(U)B3LYP-D3(BJ) SCF energy in solution: -1508.78215068 a.u.  
(U)B3LYP-D3(BJ) enthalpy in solution: -1508.153064 a.u.  
(U)B3LYP-D3(BJ) free energy in solution: -1508.253626 a.u.

### Cartesian coordinates

| ATOM | X         | Y         | Z         |
|------|-----------|-----------|-----------|
| Co   | -1.585360 | -0.090127 | -0.268176 |
| N    | -3.665154 | -0.164003 | -0.092865 |
| C    | -3.756287 | -2.572187 | 0.516721  |
| C    | -4.143046 | -1.148452 | 0.893060  |
| C    | -4.365961 | 1.120472  | 0.070224  |
| C    | -3.922342 | 2.152537  | -0.962077 |
| H    | -5.243740 | -1.115789 | 0.976529  |
| H    | -4.602692 | 3.009048  | -0.923610 |
| H    | -3.986993 | 1.721238  | -1.970814 |
| H    | -3.876510 | -0.521045 | -1.029305 |
| H    | -3.719034 | -0.885973 | 1.866532  |
| H    | -0.108383 | -0.053300 | -0.495510 |
| N    | -2.579257 | 2.631480  | -0.709717 |
| C    | -1.537680 | 1.767443  | -0.425638 |
| C    | -2.185315 | 3.964581  | -0.717585 |
| C    | -0.863357 | 3.969915  | -0.419536 |
| H    | -2.867308 | 4.772949  | -0.933723 |
| H    | -0.161776 | 4.781325  | -0.307776 |
| N    | -0.481579 | 2.641571  | -0.246121 |
| H    | -4.244207 | -3.260884 | 1.214370  |
| H    | -4.147269 | -2.799205 | -0.488012 |

|   |           |           |           |
|---|-----------|-----------|-----------|
| N | -2.330527 | -2.822256 | 0.561146  |
| C | -1.778628 | -4.060770 | 0.870159  |
| C | -1.383163 | -1.907542 | 0.121686  |
| C | -0.447758 | -3.950155 | 0.647656  |
| H | -2.372048 | -4.889236 | 1.226504  |
| H | 0.356115  | -4.658292 | 0.772050  |
| N | -0.217331 | -2.653324 | 0.198454  |
| C | 0.844800  | 2.283784  | 0.164353  |
| C | 1.845937  | 2.152966  | -0.804920 |
| C | 1.113011  | 2.133912  | 1.530607  |
| C | 3.153943  | 1.927634  | -0.371654 |
| C | 2.433305  | 1.897135  | 1.919182  |
| C | 3.469070  | 1.811900  | 0.984446  |
| H | 3.941831  | 1.824762  | -1.113926 |
| H | 2.656194  | 1.775483  | 2.977155  |
| C | 1.099012  | -2.212286 | -0.161321 |
| C | 1.975553  | -1.806432 | 0.850089  |
| C | 1.492210  | -2.270821 | -1.504678 |
| C | 3.291809  | -1.500999 | 0.496099  |
| C | 2.811245  | -1.938944 | -1.816479 |
| C | 3.728067  | -1.564472 | -0.828691 |
| H | 3.985683  | -1.190610 | 1.272616  |
| H | 3.131045  | -1.977100 | -2.855910 |
| C | 1.491464  | 2.174464  | -2.266896 |
| H | 0.802760  | 1.346769  | -2.477572 |
| H | 0.983980  | 3.101767  | -2.557075 |
| H | 2.384426  | 2.059334  | -2.888694 |
| C | 4.895717  | 1.609715  | 1.433812  |
| H | 5.495780  | 1.128417  | 0.655583  |
| H | 5.377897  | 2.566753  | 1.674790  |
| H | 4.946602  | 0.987515  | 2.334339  |

|   |           |           |           |
|---|-----------|-----------|-----------|
| C | -0.007989 | 2.174380  | 2.534909  |
| H | -0.570904 | 3.114014  | 2.479247  |
| H | -0.717770 | 1.363015  | 2.324879  |
| H | 0.373593  | 2.060328  | 3.554258  |
| C | 0.493820  | -2.624887 | -2.572880 |
| H | 0.008303  | -3.587791 | -2.373895 |
| H | -0.297516 | -1.864515 | -2.595467 |
| H | 0.971023  | -2.674517 | -3.556584 |
| C | 1.480509  | -1.639283 | 2.261944  |
| H | 0.646304  | -0.927809 | 2.271260  |
| H | 1.110095  | -2.579669 | 2.687686  |
| H | 2.273505  | -1.255336 | 2.910226  |
| C | 5.145872  | -1.201929 | -1.197935 |
| H | 5.202711  | -0.178220 | -1.591253 |
| H | 5.811988  | -1.256707 | -0.330699 |
| H | 5.542956  | -1.867058 | -1.973185 |
| H | -5.457743 | 0.982220  | -0.013329 |
| H | -4.150133 | 1.497220  | 1.074858  |

## 2-singlet

(U)B3LYP-D3(BJ) SCF energy: -1893.32973410 a.u.

(U)B3LYP-D3(BJ) enthalpy: -1892.549883 a.u.

(U)B3LYP-D3(BJ) free energy: -1892.666864 a.u.

(U)B3LYP-D3(BJ) SCF energy in solution: -1893.84480966 a.u.

(U)B3LYP-D3(BJ) enthalpy in solution: -1893.064959 a.u.

(U)B3LYP-D3(BJ) free energy in solution: -1893.181940 a.u.

## Cartesian coordinates

| ATOM | X | Y | Z |
|------|---|---|---|
|------|---|---|---|

|    |           |           |           |
|----|-----------|-----------|-----------|
| Co | -0.908064 | 0.524238  | -0.522189 |
| N  | -2.636730 | 0.955778  | -1.632731 |
| C  | -2.329539 | 3.400039  | -1.548920 |
| C  | -2.575990 | 2.184226  | -2.434066 |
| C  | -3.190070 | -0.162249 | -2.400524 |
| C  | -3.512535 | -1.348521 | -1.501790 |
| H  | -3.526840 | 2.344316  | -2.970480 |
| H  | -4.084513 | -2.085603 | -2.073400 |
| H  | -4.130523 | -1.023803 | -0.660083 |
| H  | -3.253197 | 1.151360  | -0.828386 |
| H  | -1.779639 | 2.086720  | -3.181497 |
| H  | 0.260956  | 0.205047  | 0.369965  |
| N  | -2.316463 | -2.013533 | -1.010396 |
| C  | -1.161149 | -1.347441 | -0.677014 |
| C  | -2.175140 | -3.392857 | -0.943255 |
| C  | -0.888542 | -3.628465 | -0.598289 |
| H  | -2.998230 | -4.066283 | -1.125021 |
| H  | -0.343392 | -4.547569 | -0.454769 |
| N  | -0.274693 | -2.383904 | -0.447598 |
| H  | -2.487437 | 4.310597  | -2.134028 |
| H  | -3.028347 | 3.382804  | -0.706141 |
| N  | -0.968715 | 3.441559  | -1.033338 |
| C  | -0.209021 | 4.600229  | -0.960542 |
| C  | -0.311028 | 2.342175  | -0.536460 |
| C  | 0.978767  | 4.243675  | -0.417569 |
| H  | -0.577967 | 5.555737  | -1.300173 |
| H  | 1.866777  | 4.815952  | -0.203362 |
| N  | 0.908643  | 2.876728  | -0.162322 |
| C  | 1.162559  | -2.305351 | -0.483188 |
| C  | 1.919277  | -2.396479 | 0.690104  |
| C  | 1.773181  | -2.310858 | -1.749388 |

|   |          |           |           |
|---|----------|-----------|-----------|
| C | 3.304964 | -2.543736 | 0.571887  |
| C | 3.161287 | -2.440809 | -1.818642 |
| C | 3.943755 | -2.578523 | -0.667878 |
| H | 3.896041 | -2.639619 | 1.479540  |
| H | 3.639143 | -2.457423 | -2.795889 |
| C | 2.055486 | 2.157274  | 0.311607  |
| C | 2.769342 | 1.355949  | -0.594232 |
| C | 2.497683 | 2.357821  | 1.624474  |
| C | 3.938621 | 0.744098  | -0.149334 |
| C | 3.666846 | 1.704090  | 2.032067  |
| C | 4.399647 | 0.896444  | 1.162870  |
| H | 4.499037 | 0.128379  | -0.845075 |
| H | 4.014844 | 1.843745  | 3.053328  |
| C | 1.279037 | -2.302212 | 2.045320  |
| H | 1.061005 | -1.249442 | 2.259640  |
| H | 0.331725 | -2.844398 | 2.086661  |
| H | 1.944466 | -2.685716 | 2.824799  |
| C | 5.442034 | -2.728492 | -0.766913 |
| H | 5.853734 | -3.219714 | 0.120717  |
| H | 5.728555 | -3.316022 | -1.645861 |
| H | 5.936112 | -1.751699 | -0.854058 |
| C | 0.944002 | -2.195498 | -3.002975 |
| H | 0.219713 | -3.015198 | -3.082133 |
| H | 0.369683 | -1.262092 | -3.001314 |
| H | 1.580034 | -2.211851 | -3.892792 |
| C | 1.774671 | 3.276099  | 2.578833  |
| H | 2.086519 | 4.320592  | 2.444490  |
| H | 0.694403 | 3.241256  | 2.433383  |
| H | 1.993681 | 3.002665  | 3.615671  |
| C | 2.276980 | 1.161795  | -2.001381 |
| H | 1.305999 | 0.649830  | -1.979694 |



|   |           |           |           |
|---|-----------|-----------|-----------|
| H | 2.124923  | 2.120978  | -2.511468 |
| H | 2.981627  | 0.560945  | -2.582306 |
| C | 5.650838  | 0.191866  | 1.625735  |
| H | 5.454189  | -0.868587 | 1.827241  |
| H | 6.438879  | 0.232611  | 0.865053  |
| H | 6.044379  | 0.636059  | 2.545672  |
| H | -4.121496 | 0.137510  | -2.910575 |
| H | -2.466267 | -0.457734 | -3.169484 |
| C | -2.621503 | 1.127676  | 1.454398  |
| O | -3.478927 | 1.820012  | 0.832293  |
| C | -2.964340 | -0.277676 | 1.809986  |
| C | -2.046925 | -1.172857 | 2.386159  |
| C | -4.294396 | -0.704154 | 1.642444  |
| C | -2.431566 | -2.464107 | 2.727539  |
| H | -1.021316 | -0.858520 | 2.519563  |
| C | -4.680106 | -1.999680 | 1.984834  |
| H | -5.011862 | 0.011545  | 1.254092  |
| C | -3.748709 | -2.891256 | 2.518840  |
| H | -1.704238 | -3.145961 | 3.160284  |
| H | -5.713561 | -2.309500 | 1.847720  |
| H | -4.045519 | -3.901640 | 2.786874  |
| C | -1.576709 | 1.828394  | 2.302184  |
| H | -0.626186 | 1.295101  | 2.320459  |
| H | -1.417676 | 2.831081  | 1.903089  |
| H | -1.953642 | 1.918851  | 3.333686  |

#### **4-singlet**

(U)B3LYP-D3(BJ) SCF energy: -1893.33797754 a.u.

(U)B3LYP-D3(BJ) enthalpy: -1892.556204 a.u.

(U)B3LYP-D3(BJ) free energy: -1892.676549 a.u.  
(U)B3LYP-D3(BJ) SCF energy in solution: -1893.85675169 a.u.  
(U)B3LYP-D3(BJ) enthalpy in solution: -1893.074978 a.u.  
(U)B3LYP-D3(BJ) free energy in solution: -1893.195323 a.u.

Cartesian coordinates

| ATOM | X         | Y         | Z         |
|------|-----------|-----------|-----------|
| Co   | -0.624361 | 0.551499  | -1.048442 |
| N    | -2.344728 | 0.839855  | -1.826273 |
| C    | -2.418191 | 3.312117  | -1.693128 |
| C    | -2.438540 | 2.078482  | -2.589003 |
| C    | -2.887097 | -0.260822 | -2.607763 |
| C    | -3.091935 | -1.512119 | -1.764293 |
| H    | -3.402528 | 2.117093  | -3.125270 |
| H    | -3.633429 | -2.269086 | -2.340738 |
| H    | -3.674963 | -1.269704 | -0.872357 |
| H    | -3.308248 | 1.042955  | -0.422275 |
| H    | -1.651165 | 2.174575  | -3.359970 |
| H    | -1.948236 | 0.892442  | 1.232918  |
| N    | -1.816978 | -2.099570 | -1.364457 |
| C    | -0.703756 | -1.346122 | -1.127789 |
| C    | -1.579464 | -3.454079 | -1.201146 |
| C    | -0.270091 | -3.584404 | -0.876831 |
| H    | -2.357733 | -4.191502 | -1.319091 |
| H    | 0.340406  | -4.452967 | -0.688683 |
| N    | 0.256788  | -2.291057 | -0.836896 |
| H    | -2.572683 | 4.214732  | -2.294460 |
| H    | -3.218094 | 3.233136  | -0.948821 |
| N    | -1.145538 | 3.457636  | -0.989531 |
| C    | -0.674507 | 4.643756  | -0.444184 |
| C    | -0.352372 | 2.394076  | -0.669337 |

|   |           |           |           |
|---|-----------|-----------|-----------|
| C | 0.463024  | 4.340296  | 0.229269  |
| H | -1.178446 | 5.585977  | -0.594957 |
| H | 1.158946  | 4.956112  | 0.776409  |
| N | 0.650276  | 2.967600  | 0.080703  |
| C | 1.665057  | -2.044442 | -0.734450 |
| C | 2.315590  | -2.231879 | 0.492952  |
| C | 2.379153  | -1.732638 | -1.906812 |
| C | 3.712536  | -2.170147 | 0.514379  |
| C | 3.769538  | -1.640925 | -1.824871 |
| C | 4.455775  | -1.881233 | -0.629846 |
| H | 4.227969  | -2.343615 | 1.455078  |
| H | 4.332034  | -1.409201 | -2.726638 |
| C | 1.707006  | 2.228352  | 0.701256  |
| C | 2.818599  | 1.846187  | -0.062804 |
| C | 1.608960  | 1.932586  | 2.070997  |
| C | 3.868015  | 1.195928  | 0.591489  |
| C | 2.675425  | 1.264462  | 2.675898  |
| C | 3.819908  | 0.905559  | 1.956126  |
| H | 4.740796  | 0.906253  | 0.015213  |
| H | 2.614537  | 1.029593  | 3.736425  |
| H | -3.882397 | 0.013860  | -2.999083 |
| H | -2.266822 | -0.521062 | -3.488165 |
| C | -3.011941 | 0.747700  | 1.487625  |
| O | -3.814516 | 1.239415  | 0.434524  |
| C | -3.211796 | -0.745278 | 1.709390  |
| C | -2.131074 | -1.568139 | 2.040977  |
| C | -4.481443 | -1.319493 | 1.578341  |
| C | -2.310975 | -2.937461 | 2.241464  |
| H | -1.139312 | -1.131394 | 2.117220  |
| C | -4.665954 | -2.688473 | 1.774252  |
| H | -5.311172 | -0.680400 | 1.291912  |

|   |           |           |           |
|---|-----------|-----------|-----------|
| C | -3.580106 | -3.503137 | 2.106142  |
| H | -1.460758 | -3.565186 | 2.494485  |
| H | -5.657009 | -3.122299 | 1.665454  |
| H | -3.722199 | -4.570259 | 2.256030  |
| C | -3.340375 | 1.541193  | 2.753698  |
| H | -2.749808 | 1.189573  | 3.607347  |
| H | -3.133679 | 2.604604  | 2.590069  |
| H | -4.402297 | 1.430264  | 3.000425  |
| C | 1.548571  | -2.445995 | 1.772917  |
| H | 0.650617  | -3.049714 | 1.626441  |
| H | 2.176637  | -2.927962 | 2.528540  |
| H | 1.227802  | -1.477290 | 2.177060  |
| C | 1.667256  | -1.525632 | -3.218371 |
| H | 1.023096  | -2.379338 | -3.459677 |
| H | 1.014720  | -0.644872 | -3.167608 |
| H | 2.385804  | -1.392182 | -4.032397 |
| C | 5.962056  | -1.802609 | -0.580135 |
| H | 6.357045  | -2.273552 | 0.325516  |
| H | 6.417814  | -2.295814 | -1.445915 |
| H | 6.308570  | -0.760312 | -0.586830 |
| C | 0.388055  | 2.327956  | 2.861760  |
| H | 0.323049  | 3.414997  | 2.991903  |
| H | -0.527550 | 2.016039  | 2.352512  |
| H | 0.404626  | 1.870988  | 3.855402  |
| C | 2.874975  | 2.123836  | -1.542791 |
| H | 2.738913  | 3.190292  | -1.756871 |
| H | 3.833104  | 1.802424  | -1.960442 |
| H | 2.071144  | 1.590409  | -2.064664 |
| C | 4.979207  | 0.235488  | 2.651893  |
| H | 4.641553  | -0.603698 | 3.270943  |
| H | 5.710363  | -0.146296 | 1.934073  |

H 5.499584 0.936662 3.316835

### 5-singlet

(U)B3LYP-D3(BJ) SCF energy: -1507.17892406 a.u.

(U)B3LYP-D3(BJ) enthalpy: -1506.571432 a.u.

(U)B3LYP-D3(BJ) free energy: -1506.672376 a.u.

(U)B3LYP-D3(BJ) SCF energy in solution: -1507.57902973 a.u.

(U)B3LYP-D3(BJ) enthalpy in solution: -1506.971538 a.u.

(U)B3LYP-D3(BJ) free energy in solution: -1507.072482 a.u.

### Cartesian coordinates

| ATOM | X         | Y         | Z         |
|------|-----------|-----------|-----------|
| Co   | -1.602424 | 0.080337  | -0.069106 |
| N    | -3.487305 | 0.235270  | -0.013127 |
| C    | -4.048290 | -2.099421 | 0.601214  |
| C    | -4.120725 | -0.622497 | 0.970382  |
| C    | -4.056819 | 1.563585  | 0.080107  |
| C    | -3.563816 | 2.487130  | -1.027179 |
| H    | -5.199809 | -0.393374 | 1.033446  |
| H    | -4.140994 | 3.417146  | -1.037562 |
| H    | -3.675265 | 1.985171  | -1.995862 |
| H    | -3.725544 | -0.494262 | 1.999886  |
| N    | -2.162706 | 2.839774  | -0.823128 |
| C    | -1.257322 | 1.911009  | -0.398223 |
| C    | -1.589822 | 4.090289  | -0.998918 |
| C    | -0.279274 | 3.967784  | -0.669402 |
| H    | -2.159285 | 4.945305  | -1.329537 |
| H    | 0.522230  | 4.688483  | -0.638158 |
| N    | -0.088960 | 2.634749  | -0.302179 |

|   |           |           |           |
|---|-----------|-----------|-----------|
| H | -4.598400 | -2.700724 | 1.334177  |
| H | -4.504945 | -2.241990 | -0.386744 |
| N | -2.675934 | -2.595886 | 0.555608  |
| C | -2.307360 | -3.932640 | 0.633393  |
| C | -1.620143 | -1.790743 | 0.238205  |
| C | -0.975907 | -3.987347 | 0.379122  |
| H | -3.014349 | -4.711974 | 0.873437  |
| H | -0.283956 | -4.814164 | 0.351187  |
| N | -0.568741 | -2.674446 | 0.145622  |
| C | 1.139495  | 2.129245  | 0.232175  |
| C | 2.212724  | 1.889469  | -0.636104 |
| C | 1.251199  | 1.938672  | 1.620260  |
| C | 3.436087  | 1.506794  | -0.079844 |
| C | 2.484769  | 1.522712  | 2.125138  |
| C | 3.591985  | 1.322363  | 1.294634  |
| H | 4.279838  | 1.329697  | -0.740872 |
| H | 2.585684  | 1.367615  | 3.197126  |
| C | 0.748005  | -2.299547 | -0.273475 |
| C | 1.744912  | -2.106948 | 0.691925  |
| C | 1.005039  | -2.158841 | -1.647206 |
| C | 3.040222  | -1.827394 | 0.250048  |
| C | 2.310010  | -1.852789 | -2.039464 |
| C | 3.342077  | -1.704498 | -1.107628 |
| H | 3.826762  | -1.686841 | 0.985857  |
| H | 2.526356  | -1.739836 | -3.099546 |
| C | 2.038921  | 2.003603  | -2.129377 |
| H | 1.232970  | 1.343824  | -2.470554 |
| H | 1.772432  | 3.020083  | -2.440455 |
| H | 2.958788  | 1.717799  | -2.647757 |
| C | 4.921812  | 0.911245  | 1.878205  |
| H | 5.373808  | 1.726596  | 2.457290  |

|   |           |           |           |
|---|-----------|-----------|-----------|
| H | 4.812837  | 0.057978  | 2.558292  |
| H | 5.632014  | 0.629511  | 1.094492  |
| C | 0.073376  | 2.166976  | 2.530703  |
| H | -0.362216 | 3.161320  | 2.378222  |
| H | -0.718756 | 1.437919  | 2.313361  |
| H | 0.368907  | 2.073928  | 3.580020  |
| C | -0.100600 | -2.318418 | -2.658541 |
| H | -0.614765 | -3.279449 | -2.542290 |
| H | -0.857575 | -1.535507 | -2.522362 |
| H | 0.292458  | -2.256866 | -3.677646 |
| C | 1.413129  | -2.167233 | 2.160711  |
| H | 0.651814  | -1.418372 | 2.408258  |
| H | 1.007469  | -3.143515 | 2.450031  |
| H | 2.301487  | -1.969397 | 2.767309  |
| C | 4.751764  | -1.423650 | -1.567185 |
| H | 4.774344  | -0.631090 | -2.324095 |
| H | 5.389160  | -1.114155 | -0.733381 |
| H | 5.207462  | -2.313762 | -2.019822 |
| H | -5.156163 | 1.510097  | -0.022785 |
| H | -3.866520 | 2.074038  | 1.051289  |

### TS1-singlet

(U)B3LYP-D3(BJ) SCF energy: -1893.29760971 a.u.

(U)B3LYP-D3(BJ) enthalpy: -1892.521294 a.u.

(U)B3LYP-D3(BJ) free energy: -1892.638316 a.u.

(U)B3LYP-D3(BJ) SCF energy in solution: -1893.81650311 a.u.

(U)B3LYP-D3(BJ) enthalpy in solution: -1893.040187 a.u.

(U)B3LYP-D3(BJ) free energy in solution: -1893.157209 a.u.

Imaginary frequency: -594.9319 cm<sup>-1</sup>

Cartesian coordinates

| ATOM | X         | Y         | Z         |
|------|-----------|-----------|-----------|
| Co   | -1.095861 | 0.560482  | -0.708073 |
| N    | -2.898768 | 0.885018  | -1.594211 |
| C    | -3.055501 | 3.271748  | -0.986214 |
| C    | -3.219130 | 2.231030  | -2.084019 |
| C    | -3.427507 | -0.147046 | -2.498822 |
| C    | -3.476296 | -1.502632 | -1.808663 |
| H    | -4.267652 | 2.275913  | -2.423854 |
| H    | -4.023767 | -2.209121 | -2.439548 |
| H    | -3.999381 | -1.395429 | -0.852726 |
| H    | -3.364169 | 0.746036  | -0.671506 |
| H    | -2.575912 | 2.470628  | -2.937649 |
| H    | -1.104047 | 0.191757  | 0.859430  |
| N    | -2.146814 | -2.047570 | -1.586270 |
| C    | -1.072108 | -1.284845 | -1.193654 |
| C    | -1.813983 | -3.382772 | -1.775326 |
| C    | -0.490408 | -3.485757 | -1.517987 |
| H    | -2.544093 | -4.124551 | -2.060065 |
| H    | 0.183593  | -4.326714 | -1.547877 |
| N    | -0.047930 | -2.209627 | -1.168808 |
| H    | -3.439368 | 4.233674  | -1.338684 |
| H    | -3.648046 | 2.969395  | -0.112746 |
| N    | -1.668985 | 3.457850  | -0.600965 |
| C    | -1.088810 | 4.689572  | -0.318015 |
| C    | -0.799369 | 2.406883  | -0.411834 |
| C    | 0.185255  | 4.434189  | 0.057445  |
| H    | -1.627443 | 5.619126  | -0.419745 |
| H    | 0.992770  | 5.091159  | 0.337343  |
| N    | 0.350442  | 3.050104  | 0.006766  |



|   |          |           |           |
|---|----------|-----------|-----------|
| C | 1.357700 | -1.952200 | -1.035286 |
| C | 1.960516 | -2.002172 | 0.227008  |
| C | 2.109169 | -1.809042 | -2.213400 |
| C | 3.358818 | -1.980781 | 0.280429  |
| C | 3.500323 | -1.780458 | -2.109044 |
| C | 4.143028 | -1.895114 | -0.871127 |
| H | 3.841569 | -2.046266 | 1.252278  |
| H | 4.095106 | -1.687101 | -3.015423 |
| C | 1.575808 | 2.417943  | 0.387720  |
| C | 2.384514 | 1.825997  | -0.594967 |
| C | 1.968583 | 2.474616  | 1.732747  |
| C | 3.630073 | 1.331846  | -0.205404 |
| C | 3.217538 | 1.950485  | 2.076712  |
| C | 4.066957 | 1.390076  | 1.121481  |
| H | 4.270296 | 0.886858  | -0.960114 |
| H | 3.534650 | 1.990682  | 3.116564  |
| C | 1.124433 | -2.073561 | 1.472379  |
| H | 0.482130 | -1.188064 | 1.540199  |
| H | 0.453379 | -2.938135 | 1.471541  |
| H | 1.753153 | -2.124629 | 2.365757  |
| C | 5.650435 | -1.898732 | -0.794912 |
| H | 6.000331 | -2.216332 | 0.191996  |
| H | 6.084611 | -2.572664 | -1.542274 |
| H | 6.064250 | -0.899681 | -0.983235 |
| C | 1.422727 | -1.705265 | -3.552132 |
| H | 0.895944 | -2.632156 | -3.809590 |
| H | 0.672783 | -0.906614 | -3.541162 |
| H | 2.146563 | -1.493234 | -4.344520 |
| C | 1.084193 | 3.093343  | 2.786543  |
| H | 1.177012 | 4.186834  | 2.809207  |
| H | 0.032117 | 2.864159  | 2.604036  |

|   |           |           |           |
|---|-----------|-----------|-----------|
| H | 1.354687  | 2.720988  | 3.779371  |
| C | 1.927223  | 1.744562  | -2.027580 |
| H | 0.996701  | 1.163106  | -2.101290 |
| H | 1.708379  | 2.739670  | -2.434473 |
| H | 2.689017  | 1.268494  | -2.650432 |
| C | 5.411949  | 0.837427  | 1.522668  |
| H | 6.148543  | 0.952933  | 0.720753  |
| H | 5.799293  | 1.338952  | 2.415631  |
| H | 5.347056  | -0.233913 | 1.749453  |
| H | -4.457639 | 0.105084  | -2.801432 |
| H | -2.809054 | -0.192273 | -3.401665 |
| C | -2.679290 | 0.063412  | 1.742949  |
| O | -3.655122 | 0.065189  | 0.933209  |
| C | -2.252707 | -1.242915 | 2.347011  |
| C | -1.486090 | -1.333005 | 3.520616  |
| C | -2.673900 | -2.438427 | 1.742974  |
| C | -1.133048 | -2.571764 | 4.053199  |
| H | -1.150353 | -0.431396 | 4.021194  |
| C | -2.305811 | -3.675736 | 2.261055  |
| H | -3.290540 | -2.375366 | 0.857157  |
| C | -1.531100 | -3.752485 | 3.422374  |
| H | -0.539783 | -2.614480 | 4.963183  |
| H | -2.630308 | -4.585809 | 1.762361  |
| H | -1.247775 | -4.717680 | 3.833229  |
| C | -2.429405 | 1.336430  | 2.540981  |
| H | -1.444004 | 1.364978  | 3.006785  |
| H | -2.519837 | 2.196187  | 1.875365  |
| H | -3.195831 | 1.420951  | 3.326463  |

### TS3-singlet

(U)B3LYP-D3(BJ) SCF energy: -1508.31554431 a.u.  
(U)B3LYP-D3(BJ) enthalpy: -1507.694868 a.u.  
(U)B3LYP-D3(BJ) free energy: -1507.795803 a.u.  
(U)B3LYP-D3(BJ) SCF energy in solution: -1508.72713133 a.u.  
(U)B3LYP-D3(BJ) enthalpy in solution: -1508.106455 a.u.  
(U)B3LYP-D3(BJ) free energy in solution: -1508.207390 a.u.  
Imaginary frequency: -1457.7790 cm-1

### Cartesian coordinates

| ATOM | X         | Y         | Z         |
|------|-----------|-----------|-----------|
| Co   | -1.609904 | 0.109904  | -0.301348 |
| N    | -3.554459 | 0.428237  | -0.033351 |
| C    | -4.142112 | -1.918357 | 0.546924  |
| C    | -4.241627 | -0.438583 | 0.902808  |
| C    | -4.021326 | 1.794675  | 0.088962  |
| C    | -3.390595 | 2.720620  | -0.948812 |
| H    | -5.317738 | -0.195057 | 0.922014  |
| H    | -3.914219 | 3.680943  | -0.954186 |
| H    | -3.470886 | 2.265392  | -1.944049 |
| H    | -3.854264 | -0.285284 | 1.925396  |
| N    | -1.994314 | 2.974259  | -0.648846 |
| C    | -1.129517 | 1.951263  | -0.353365 |
| C    | -1.364928 | 4.211322  | -0.672234 |
| C    | -0.060073 | 3.985583  | -0.387971 |
| H    | -1.896578 | 5.126474  | -0.883092 |
| H    | 0.776721  | 4.657397  | -0.282065 |
| N    | 0.074005  | 2.608235  | -0.194655 |
| H    | -4.788516 | -2.495951 | 1.215889  |
| H    | -4.492833 | -2.064357 | -0.484518 |
| N    | -2.790687 | -2.433598 | 0.667364  |

|   |           |           |           |
|---|-----------|-----------|-----------|
| C | -2.462510 | -3.768063 | 0.889787  |
| C | -1.702875 | -1.694227 | 0.280175  |
| C | -1.133675 | -3.887619 | 0.654726  |
| H | -3.194134 | -4.496231 | 1.205032  |
| H | -0.467395 | -4.732953 | 0.723840  |
| N | -0.681742 | -2.620036 | 0.285795  |
| C | 1.303118  | 2.023203  | 0.249166  |
| C | 2.342839  | 1.849709  | -0.674422 |
| C | 1.469209  | 1.737450  | 1.614608  |
| C | 3.588831  | 1.438323  | -0.193748 |
| C | 2.725330  | 1.304296  | 2.043528  |
| C | 3.801440  | 1.172919  | 1.160103  |
| H | 4.406950  | 1.310501  | -0.897561 |
| H | 2.869041  | 1.080093  | 3.098233  |
| C | 0.634536  | -2.331433 | -0.193426 |
| C | 1.659185  | -2.087457 | 0.729981  |
| C | 0.860419  | -2.317794 | -1.581115 |
| C | 2.947486  | -1.867876 | 0.237534  |
| C | 2.159646  | -2.059722 | -2.025272 |
| C | 3.214931  | -1.847594 | -1.132604 |
| H | 3.755036  | -1.690953 | 0.941046  |
| H | 2.353104  | -2.043129 | -3.095694 |
| C | 2.113366  | 2.086166  | -2.146089 |
| H | 1.262117  | 1.496815  | -2.504463 |
| H | 1.886098  | 3.136328  | -2.364118 |
| H | 2.997116  | 1.802606  | -2.725138 |
| C | 5.160740  | 0.753338  | 1.664692  |
| H | 5.084913  | -0.071610 | 2.382638  |
| H | 5.809224  | 0.429711  | 0.844410  |
| H | 5.667860  | 1.580155  | 2.178810  |
| C | 0.323857  | 1.897373  | 2.578262  |

|   |           |           |           |
|---|-----------|-----------|-----------|
| H | -0.077345 | 2.917779  | 2.552903  |
| H | -0.499702 | 1.227001  | 2.298723  |
| H | 0.640924  | 1.675001  | 3.601667  |
| C | -0.259933 | -2.587553 | -2.553294 |
| H | -0.767501 | -3.530406 | -2.317310 |
| H | -1.022811 | -1.799181 | -2.513843 |
| H | 0.124930  | -2.650351 | -3.575597 |
| C | 1.363985  | -2.044978 | 2.207217  |
| H | 0.575022  | -1.314480 | 2.417095  |
| H | 1.012017  | -3.013715 | 2.581709  |
| H | 2.256406  | -1.761977 | 2.772114  |
| C | 4.612371  | -1.605077 | -1.648199 |
| H | 4.995882  | -2.479650 | -2.188482 |
| H | 4.636737  | -0.759874 | -2.346328 |
| H | 5.306469  | -1.386340 | -0.831249 |
| H | -5.116459 | 1.833124  | -0.045769 |
| H | -3.804334 | 2.196592  | 1.095370  |
| H | -2.577448 | -0.183464 | -2.026020 |
| H | -3.289346 | 0.052532  | -1.202687 |

## 1-L2

(U)B3LYP-D3(BJ) SCF energy: -1547.69931453 a.u.

(U)B3LYP-D3(BJ) enthalpy: -1547.043073 a.u.

(U)B3LYP-D3(BJ) free energy: -1547.147577 a.u.

(U)B3LYP-D3(BJ) SCF energy in solution: -1548.12179925 a.u.

(U)B3LYP-D3(BJ) enthalpy in solution: -1547.465558 a.u.

(U)B3LYP-D3(BJ) free energy in solution: -1547.570062 a.u.

Cartesian coordinates

| ATOM | X         | Y         | Z         |
|------|-----------|-----------|-----------|
| Co   | -1.686956 | -0.118383 | -0.792884 |
| N    | -3.921452 | 0.008379  | -0.116318 |
| C    | -3.711472 | -2.244253 | 1.009436  |
| C    | -4.127702 | -0.782445 | 1.104322  |
| C    | -4.300250 | 1.404576  | 0.158908  |
| C    | -3.621334 | 2.403107  | -0.776089 |
| H    | -5.195808 | -0.765041 | 1.394802  |
| H    | -4.184957 | 3.340973  | -0.774922 |
| H    | -3.595350 | 2.014287  | -1.801520 |
| H    | -3.550839 | -0.311846 | 1.905312  |
| H    | -1.833085 | -0.201632 | -2.444607 |
| N    | -2.265368 | 2.707336  | -0.357960 |
| C    | -1.289944 | 1.737438  | -0.212627 |
| C    | -1.766479 | 3.996610  | -0.223525 |
| C    | -0.444073 | 3.871550  | 0.027605  |
| H    | -2.391612 | 4.871630  | -0.315560 |
| H    | 0.325830  | 4.607304  | 0.197224  |
| N    | -0.166344 | 2.501688  | 0.036914  |
| H    | -4.124083 | -2.759658 | 1.883131  |
| H    | -4.151372 | -2.719144 | 0.123951  |
| N    | -2.275181 | -2.464463 | 1.021668  |
| C    | -1.720685 | -3.628469 | 1.546772  |
| C    | -1.338443 | -1.672353 | 0.381260  |
| C    | -0.401071 | -3.591008 | 1.258800  |
| H    | -2.311114 | -4.362499 | 2.073656  |
| H    | 0.399644  | -4.278887 | 1.479001  |
| N    | -0.180447 | -2.407585 | 0.555530  |
| C    | 1.182981  | 2.053067  | 0.203557  |
| C    | 1.955088  | 1.774339  | -0.934036 |
| C    | 1.738924  | 2.071668  | 1.489886  |

|   |           |           |           |
|---|-----------|-----------|-----------|
| C | 3.328189  | 1.587567  | -0.757763 |
| C | 3.116047  | 1.872590  | 1.617421  |
| C | 3.929832  | 1.658077  | 0.501539  |
| H | 3.944255  | 1.401030  | -1.633723 |
| H | 3.563546  | 1.905980  | 2.608639  |
| C | 1.114678  | -2.091345 | 0.034527  |
| C | 2.106486  | -1.670624 | 0.932152  |
| C | 1.392686  | -2.336551 | -1.319127 |
| C | 3.411043  | -1.537102 | 0.456948  |
| C | 2.707942  | -2.148681 | -1.755751 |
| C | 3.730526  | -1.768690 | -0.883410 |
| H | 4.191433  | -1.236946 | 1.150215  |
| H | 2.941671  | -2.337596 | -2.801103 |
| C | 1.325475  | 1.725211  | -2.301231 |
| H | 0.531777  | 0.970372  | -2.349529 |
| H | 0.856000  | 2.683501  | -2.555817 |
| H | 2.075583  | 1.495272  | -3.063675 |
| C | 5.420317  | 1.482036  | 0.658545  |
| H | 5.955017  | 1.786776  | -0.247150 |
| H | 5.805810  | 2.073120  | 1.496151  |
| H | 5.683230  | 0.434112  | 0.850833  |
| C | 0.868122  | 2.326291  | 2.694801  |
| H | 0.517682  | 3.365212  | 2.731592  |
| H | -0.024825 | 1.692572  | 2.668041  |
| H | 1.415557  | 2.121554  | 3.619702  |
| C | 0.325065  | -2.821678 | -2.263467 |
| H | -0.209413 | -3.683146 | -1.845437 |
| H | -0.423563 | -2.039561 | -2.446118 |
| H | 0.763941  | -3.118583 | -3.221065 |
| C | 1.769509  | -1.386100 | 2.374141  |
| H | 0.873879  | -0.761274 | 2.444038  |

|   |           |           |           |
|---|-----------|-----------|-----------|
| H | 1.565226  | -2.304998 | 2.938092  |
| H | 2.594136  | -0.861889 | 2.864311  |
| C | 5.142231  | -1.588989 | -1.384729 |
| H | 5.321696  | -0.552896 | -1.699483 |
| H | 5.877415  | -1.821886 | -0.606794 |
| H | 5.344829  | -2.231552 | -2.247909 |
| H | -5.396814 | 1.521862  | 0.094787  |
| H | -4.002300 | 1.649320  | 1.182381  |
| C | -4.714541 | -0.510126 | -1.238770 |
| H | -5.786442 | -0.589976 | -0.974733 |
| H | -4.597874 | 0.151230  | -2.096990 |
| H | -4.334229 | -1.482511 | -1.551244 |

## 2-L2

(U)B3LYP-D3(BJ) SCF energy: -1932.64149627 a.u.

(U)B3LYP-D3(BJ) enthalpy: -1931.835497 a.u.

(U)B3LYP-D3(BJ) free energy: -1931.962068 a.u.

(U)B3LYP-D3(BJ) SCF energy in solution: -1933.17797628 a.u.

(U)B3LYP-D3(BJ) enthalpy in solution: -1932.371977 a.u.

(U)B3LYP-D3(BJ) free energy in solution: -1932.498548 a.u.

## Cartesian coordinates

| ATOM | X         | Y         | Z         |
|------|-----------|-----------|-----------|
| Co   | -0.721656 | 0.838060  | -0.148795 |
| N    | -2.454192 | 1.687601  | -1.469609 |
| C    | -1.265106 | 3.915369  | -1.463241 |
| C    | -1.961728 | 2.822971  | -2.263531 |
| C    | -2.959220 | 0.666269  | -2.403628 |
| C    | -3.099900 | -0.714669 | -1.775151 |



|   |           |           |           |
|---|-----------|-----------|-----------|
| H | -2.800547 | 3.289898  | -2.813445 |
| H | -3.769800 | -1.320833 | -2.390759 |
| H | -3.541412 | -0.652848 | -0.778271 |
| H | -1.250576 | 2.434334  | -2.997843 |
| H | -1.279244 | 0.843882  | 1.414999  |
| N | -1.831559 | -1.420678 | -1.695260 |
| C | -0.685074 | -0.886840 | -1.138151 |
| C | -1.680425 | -2.748728 | -2.067924 |
| C | -0.411009 | -3.093882 | -1.758365 |
| H | -2.486772 | -3.320110 | -2.500401 |
| H | 0.129764  | -4.019494 | -1.874436 |
| N | 0.184419  | -1.960472 | -1.197135 |
| H | -1.207988 | 4.808317  | -2.093815 |
| H | -1.849049 | 4.185196  | -0.575336 |
| N | 0.093524  | 3.581824  | -1.070061 |
| C | 1.089317  | 4.548320  | -0.967918 |
| C | 0.487145  | 2.357240  | -0.562861 |
| C | 2.155815  | 3.943410  | -0.400030 |
| H | 0.948172  | 5.561145  | -1.313227 |
| H | 3.136984  | 4.310995  | -0.144900 |
| N | 1.781966  | 2.620898  | -0.159352 |
| C | 1.555887  | -2.015693 | -0.788339 |
| C | 1.871393  | -2.219438 | 0.562257  |
| C | 2.540084  | -2.037971 | -1.788504 |
| C | 3.194946  | -2.535852 | 0.881334  |
| C | 3.849256  | -2.354594 | -1.421065 |
| C | 4.188111  | -2.639198 | -0.095016 |
| H | 3.448087  | -2.724210 | 1.921453  |
| H | 4.616592  | -2.397111 | -2.191349 |
| C | 2.653601  | 1.740944  | 0.559544  |
| C | 3.724307  | 1.152280  | -0.126071 |

|   |           |           |           |
|---|-----------|-----------|-----------|
| C | 2.502216  | 1.618796  | 1.949769  |
| C | 4.682403  | 0.462226  | 0.617900  |
| C | 3.467084  | 0.884840  | 2.645783  |
| C | 4.571035  | 0.318646  | 2.003110  |
| H | 5.530852  | 0.024285  | 0.099946  |
| H | 3.369234  | 0.785583  | 3.724626  |
| C | 0.809786  | -2.148343 | 1.628153  |
| H | 0.272060  | -1.193347 | 1.594480  |
| H | 0.062504  | -2.940185 | 1.492856  |
| H | 1.252837  | -2.265380 | 2.621488  |
| C | 5.601175  | -3.024337 | 0.267663  |
| H | 5.642660  | -3.516180 | 1.244505  |
| H | 6.030129  | -3.706601 | -0.474589 |
| H | 6.256932  | -2.146096 | 0.317553  |
| C | 2.180319  | -1.747658 | -3.224496 |
| H | 1.607946  | -2.566768 | -3.676872 |
| H | 1.556393  | -0.850165 | -3.293451 |
| H | 3.081598  | -1.594038 | -3.825276 |
| C | 1.365072  | 2.291419  | 2.671862  |
| H | 1.325811  | 3.361702  | 2.434802  |
| H | 0.401200  | 1.861319  | 2.369915  |
| H | 1.478691  | 2.183417  | 3.755058  |
| C | 3.840250  | 1.285150  | -1.623227 |
| H | 2.890894  | 1.033116  | -2.105701 |
| H | 4.091240  | 2.310189  | -1.923987 |
| H | 4.613374  | 0.616340  | -2.011084 |
| C | 5.604694  | -0.447864 | 2.790849  |
| H | 5.313571  | -1.499447 | 2.909574  |
| H | 6.579598  | -0.436274 | 2.292437  |
| H | 5.730923  | -0.030647 | 3.795567  |
| H | -3.936837 | 0.978189  | -2.813147 |

|   |           |           |           |
|---|-----------|-----------|-----------|
| H | -2.258040 | 0.589715  | -3.239293 |
| C | -4.803945 | 0.378320  | 2.356633  |
| O | -5.846815 | 0.983842  | 2.137722  |
| C | -4.550057 | -0.944460 | 1.696682  |
| C | -3.287412 | -1.557750 | 1.705140  |
| C | -5.611069 | -1.558415 | 1.013068  |
| C | -3.098278 | -2.770852 | 1.042142  |
| H | -2.442245 | -1.063293 | 2.168958  |
| C | -5.421411 | -2.773259 | 0.361673  |
| H | -6.573133 | -1.056665 | 1.007743  |
| C | -4.161557 | -3.382051 | 0.377431  |
| H | -2.113451 | -3.225495 | 1.021646  |
| H | -6.249624 | -3.247211 | -0.158331 |
| H | -4.007010 | -4.327787 | -0.135453 |
| C | -3.731451 | 0.942759  | 3.254284  |
| H | -2.814413 | 1.124216  | 2.667548  |
| H | -4.087963 | 1.875367  | 3.696173  |
| H | -3.466488 | 0.232569  | 4.046801  |
| C | -3.532930 | 2.107610  | -0.561351 |
| H | -4.334059 | 2.641497  | -1.104660 |
| H | -3.964563 | 1.235406  | -0.074594 |
| H | -3.134659 | 2.742654  | 0.229253  |

## 5-L2

(U)B3LYP-D3(BJ) SCF energy: -1932.68779079 a.u.

(U)B3LYP-D3(BJ) enthalpy: -1931.876319 a.u.

(U)B3LYP-D3(BJ) free energy: -1931.998716 a.u.

(U)B3LYP-D3(BJ) SCF energy in solution: -1933.20982197 a.u.

(U)B3LYP-D3(BJ) enthalpy in solution: -1932.398350 a.u.

(U)B3LYP-D3(BJ) free energy in solution: -1932.520747 a.u.

Cartesian coordinates

| ATOM | X         | Y         | Z         |
|------|-----------|-----------|-----------|
| Co   | 1.425012  | 0.193227  | -0.056959 |
| N    | 3.444758  | 0.928216  | 0.792412  |
| C    | 3.370458  | 3.073325  | -0.575500 |
| C    | 3.443856  | 2.397688  | 0.789233  |
| C    | 3.622126  | 0.448072  | 2.176789  |
| C    | 2.870112  | -0.855211 | 2.452222  |
| H    | 4.361908  | 2.787168  | 1.269756  |
| H    | 3.276034  | -1.335614 | 3.347601  |
| H    | 2.961203  | -1.529131 | 1.593536  |
| H    | 2.586393  | 2.717755  | 1.388654  |
| H    | 1.063457  | -2.351777 | -2.061261 |
| N    | 1.451650  | -0.603950 | 2.693179  |
| C    | 0.648798  | 0.034225  | 1.773679  |
| C    | 0.758037  | -0.983131 | 3.832959  |
| C    | -0.522053 | -0.574412 | 3.657785  |
| H    | 1.227979  | -1.511009 | 4.648673  |
| H    | -1.393794 | -0.658825 | 4.286949  |
| N    | -0.572239 | 0.044775  | 2.407171  |
| H    | 3.476013  | 4.150644  | -0.400331 |
| H    | 4.223165  | 2.771872  | -1.197168 |
| N    | 2.134924  | 2.863067  | -1.315512 |
| C    | 1.787107  | 3.662884  | -2.404631 |
| C    | 1.282491  | 1.784361  | -1.167869 |
| C    | 0.689631  | 3.103732  | -2.966632 |
| H    | 2.341428  | 4.551076  | -2.667668 |
| H    | 0.093357  | 3.400166  | -3.815297 |
| N    | 0.393578  | 1.973968  | -2.210753 |

|   |           |           |           |
|---|-----------|-----------|-----------|
| C | -1.734542 | 0.771247  | 1.986160  |
| C | -2.766752 | 0.106031  | 1.313481  |
| C | -1.841904 | 2.118421  | 2.365473  |
| C | -3.947183 | 0.815739  | 1.068308  |
| C | -3.036098 | 2.788806  | 2.091867  |
| C | -4.104425 | 2.148354  | 1.455854  |
| H | -4.763395 | 0.308317  | 0.559269  |
| H | -3.134781 | 3.831541  | 2.385390  |
| C | -0.609465 | 1.000980  | -2.511765 |
| C | -1.924295 | 1.224064  | -2.088008 |
| C | -0.229065 | -0.167760 | -3.188233 |
| C | -2.860829 | 0.208575  | -2.296060 |
| C | -1.198447 | -1.156750 | -3.371588 |
| C | -2.507746 | -0.999022 | -2.905223 |
| H | -3.880804 | 0.356632  | -1.951135 |
| H | -0.919946 | -2.075547 | -3.881886 |
| C | -2.605449 | -1.320597 | 0.869420  |
| H | -1.768848 | -1.424010 | 0.172393  |
| H | -2.389961 | -1.989907 | 1.706723  |
| H | -3.509683 | -1.677264 | 0.368875  |
| C | -5.376765 | 2.897839  | 1.144422  |
| H | -6.237041 | 2.222494  | 1.092157  |
| H | -5.587834 | 3.662030  | 1.899940  |
| H | -5.305251 | 3.410897  | 0.175555  |
| C | -0.687921 | 2.813331  | 3.041644  |
| H | -0.404433 | 2.309748  | 3.973522  |
| H | 0.194207  | 2.798467  | 2.390739  |
| H | -0.938345 | 3.852694  | 3.273419  |
| C | 1.182843  | -0.343180 | -3.687892 |
| H | 1.516624  | 0.538278  | -4.247307 |
| H | 1.874276  | -0.480910 | -2.848151 |

|   |           |           |           |
|---|-----------|-----------|-----------|
| H | 1.256052  | -1.216657 | -4.342125 |
| C | -2.292816 | 2.515889  | -1.408718 |
| H | -1.788754 | 2.600925  | -0.441048 |
| H | -1.995277 | 3.384591  | -2.006662 |
| H | -3.369041 | 2.569934  | -1.234922 |
| C | -3.502363 | -2.127491 | -3.015677 |
| H | -3.396755 | -2.810052 | -2.161923 |
| H | -4.533429 | -1.758609 | -3.019327 |
| H | -3.346284 | -2.716976 | -3.925696 |
| H | 4.694303  | 0.311479  | 2.397137  |
| H | 3.244149  | 1.211522  | 2.863426  |
| C | 1.537975  | -2.648045 | -1.107731 |
| O | 2.160539  | -1.576674 | -0.488242 |
| C | 0.428191  | -3.305859 | -0.285947 |
| C | -0.688209 | -3.868312 | -0.917191 |
| C | 0.526129  | -3.418747 | 1.104571  |
| C | -1.675058 | -4.531340 | -0.185206 |
| H | -0.782074 | -3.783333 | -1.997050 |
| C | -0.456632 | -4.075459 | 1.844567  |
| H | 1.383092  | -2.982487 | 1.600675  |
| C | -1.562285 | -4.638683 | 1.202461  |
| H | -2.531704 | -4.963461 | -0.697443 |
| H | -0.362134 | -4.142640 | 2.925686  |
| H | -2.330396 | -5.149626 | 1.777239  |
| C | 2.594134  | -3.716932 | -1.458545 |
| H | 2.156151  | -4.578964 | -1.977647 |
| H | 3.363237  | -3.269025 | -2.098219 |
| H | 3.075404  | -4.073159 | -0.539715 |
| C | 4.463330  | 0.341707  | -0.085148 |
| H | 5.484821  | 0.653131  | 0.202165  |
| H | 4.368425  | -0.743850 | -0.049251 |

H 4.270462 0.629184 -1.119866

### TS1-L2

(U)B3LYP-D3(BJ) SCF energy: -1932.63895943 a.u.

(U)B3LYP-D3(BJ) enthalpy: -1931.834283 a.u.

(U)B3LYP-D3(BJ) free energy: -1931.959600 a.u.

(U)B3LYP-D3(BJ) SCF energy in solution: -1933.17090977 a.u.

(U)B3LYP-D3(BJ) enthalpy in solution: -1932.366233 a.u.

(U)B3LYP-D3(BJ) free energy in solution: -1932.491550 a.u.

Imaginary frequency: -92.1647 cm-1

### Cartesian coordinates

| ATOM | X        | Y         | Z         |
|------|----------|-----------|-----------|
| Co   | 1.202775 | -0.791665 | 0.008418  |
| N    | 2.931292 | -1.949752 | -0.879541 |
| C    | 1.988192 | -4.133693 | 0.002285  |
| C    | 2.467735 | -3.310568 | -1.188182 |
| C    | 3.378546 | -1.309274 | -2.132267 |
| C    | 3.351091 | 0.219165  | -2.085623 |
| H    | 3.280386 | -3.893302 | -1.662494 |
| H    | 3.980600 | 0.606444  | -2.892975 |
| H    | 3.742571 | 0.600621  | -1.137852 |
| H    | 1.648193 | -3.222904 | -1.907407 |
| H    | 2.058560 | 0.119031  | 1.136157  |
| N    | 2.003309 | 0.741425  | -2.308662 |
| C    | 0.900396 | 0.283238  | -1.629640 |
| C    | 1.686920 | 1.733626  | -3.224259 |
| C    | 0.347292 | 1.919727  | -3.144788 |
| H    | 2.434899 | 2.215917  | -3.834585 |

|   |           |           |           |
|---|-----------|-----------|-----------|
| H | -0.318423 | 2.582063  | -3.674796 |
| N | -0.117183 | 1.029306  | -2.174589 |
| H | 1.838699  | -5.158481 | -0.355886 |
| H | 2.762275  | -4.179364 | 0.777327  |
| N | 0.731989  | -3.694689 | 0.595565  |
| C | -0.050382 | -4.549122 | 1.367919  |
| C | 0.243097  | -2.403158 | 0.582254  |
| C | -1.073042 | -3.807631 | 1.851945  |
| H | 0.189537  | -5.593710 | 1.496049  |
| H | -1.906632 | -4.067884 | 2.484730  |
| N | -0.888450 | -2.513421 | 1.370848  |
| C | -1.520253 | 0.842507  | -1.951591 |
| C | -2.207314 | 1.737822  | -1.124730 |
| C | -2.181470 | -0.170956 | -2.662439 |
| C | -3.600949 | 1.641358  | -1.073461 |
| C | -3.571906 | -0.239975 | -2.566465 |
| C | -4.299293 | 0.670345  | -1.791965 |
| H | -4.150467 | 2.335102  | -0.442699 |
| H | -4.098746 | -1.018754 | -3.113806 |
| C | -1.790417 | -1.440159 | 1.661802  |
| C | -3.040294 | -1.429927 | 1.027291  |
| C | -1.430752 | -0.466749 | 2.608394  |
| C | -3.937452 | -0.411663 | 1.355499  |
| C | -2.346262 | 0.555767  | 2.870755  |
| C | -3.600670 | 0.600330  | 2.256113  |
| H | -4.911990 | -0.396321 | 0.876699  |
| H | -2.075694 | 1.326117  | 3.589574  |
| C | -1.457052 | 2.747832  | -0.300915 |
| H | -0.748762 | 2.252963  | 0.370686  |
| H | -0.865213 | 3.430824  | -0.918065 |
| H | -2.143263 | 3.344303  | 0.307402  |



|   |           |           |           |
|---|-----------|-----------|-----------|
| C | -5.804421 | 0.582986  | -1.719355 |
| H | -6.210240 | 1.299157  | -0.997975 |
| H | -6.266678 | 0.790871  | -2.692498 |
| H | -6.132606 | -0.419656 | -1.417684 |
| C | -1.400310 | -1.155104 | -3.494171 |
| H | -0.791813 | -0.646243 | -4.251406 |
| H | -0.709014 | -1.721456 | -2.858750 |
| H | -2.069862 | -1.854878 | -4.003260 |
| C | -0.114296 | -0.528569 | 3.334950  |
| H | 0.067094  | -1.529991 | 3.742779  |
| H | 0.716857  | -0.306781 | 2.651850  |
| H | -0.096762 | 0.189501  | 4.160994  |
| C | -3.400570 | -2.485020 | 0.011939  |
| H | -2.623370 | -2.563925 | -0.754625 |
| H | -3.506193 | -3.476448 | 0.468830  |
| H | -4.342757 | -2.236900 | -0.482882 |
| C | -4.555681 | 1.733142  | 2.541157  |
| H | -4.231482 | 2.654627  | 2.039638  |
| H | -5.565973 | 1.503617  | 2.187337  |
| H | -4.612563 | 1.954006  | 3.613104  |
| H | 4.400853  | -1.644012 | -2.379573 |
| H | 2.718792  | -1.640300 | -2.939990 |
| C | 3.479571  | 1.383459  | 1.529868  |
| O | 4.407347  | 1.195603  | 0.720436  |
| C | 2.533046  | 2.533355  | 1.307936  |
| C | 1.580460  | 2.940264  | 2.254016  |
| C | 2.673036  | 3.286738  | 0.133475  |
| C | 0.793716  | 4.068972  | 2.031367  |
| H | 1.445698  | 2.371794  | 3.167591  |
| C | 1.878818  | 4.406811  | -0.096724 |
| H | 3.429426  | 2.981235  | -0.580128 |

|   |          |           |           |
|---|----------|-----------|-----------|
| C | 0.940118 | 4.809981  | 0.856057  |
| H | 0.063216 | 4.371388  | 2.777418  |
| H | 1.999577 | 4.974642  | -1.015862 |
| H | 0.326089 | 5.689901  | 0.684061  |
| C | 3.612936 | 0.808978  | 2.933974  |
| H | 2.660822 | 0.666868  | 3.445470  |
| H | 4.128874 | -0.150733 | 2.869921  |
| H | 4.233697 | 1.493578  | 3.531771  |
| C | 4.026016 | -1.947423 | 0.104424  |
| H | 4.858183 | -2.599373 | -0.220947 |
| H | 4.390301 | -0.928817 | 0.248281  |
| H | 3.653718 | -2.288763 | 1.071309  |

### TS3-L2

(U)B3LYP-D3(BJ) SCF energy: -1933.82543896 a.u.

(U)B3LYP-D3(BJ) enthalpy: -1932.998374 a.u.

(U)B3LYP-D3(BJ) free energy: -1933.121887 a.u.

(U)B3LYP-D3(BJ) SCF energy in solution: -1934.36133401 a.u.

(U)B3LYP-D3(BJ) enthalpy in solution: -1933.534269 a.u.

(U)B3LYP-D3(BJ) free energy in solution: -1933.657782 a.u.

Imaginary frequency: -222.0634 cm<sup>-1</sup>

### Cartesian coordinates

| ATOM | X         | Y        | Z         |
|------|-----------|----------|-----------|
| Co   | 0.572934  | 1.424466 | -0.110604 |
| N    | 1.745643  | 3.227293 | 0.732545  |
| C    | -0.163676 | 4.701320 | -0.053616 |
| C    | 3.148460  | 1.467654 | 1.844831  |
| H    | 3.942676  | 1.395478 | 2.593205  |

|   |           |           |           |
|---|-----------|-----------|-----------|
| H | 3.603686  | 1.319718  | 0.860371  |
| H | 2.817368  | -1.000129 | -3.306969 |
| N | 2.210426  | 0.385430  | 2.101960  |
| C | 1.012954  | 0.257858  | 1.440291  |
| C | 2.448332  | -0.662036 | 2.982291  |
| C | 1.374554  | -1.482419 | 2.891527  |
| H | 3.351155  | -0.733243 | 3.568521  |
| H | 1.133512  | -2.406319 | 3.392120  |
| N | 0.514388  | -0.909804 | 1.955506  |
| H | -0.641184 | 5.634730  | 0.262346  |
| H | 0.423569  | 4.929635  | -0.950455 |
| N | -1.230949 | 3.773995  | -0.401357 |
| C | -2.414688 | 4.208018  | -0.992985 |
| C | -1.108279 | 2.401247  | -0.418151 |
| C | -3.081932 | 3.096342  | -1.374664 |
| H | -2.669698 | 5.253334  | -1.078178 |
| H | -4.036555 | 2.965702  | -1.858573 |
| N | -2.286676 | 2.007682  | -1.015368 |
| C | -0.775860 | -1.485897 | 1.701919  |
| C | -0.904985 | -2.490220 | 0.733205  |
| C | -1.836029 | -1.106371 | 2.536568  |
| C | -2.125770 | -3.169890 | 0.674824  |
| C | -3.036373 | -1.811181 | 2.434881  |
| C | -3.187382 | -2.865190 | 1.529560  |
| H | -2.243028 | -3.962607 | -0.059443 |
| H | -3.866198 | -1.536064 | 3.081993  |
| C | -2.720706 | 0.663730  | -1.274848 |
| C | -3.779899 | 0.163960  | -0.498771 |
| C | -2.188136 | -0.061804 | -2.352113 |
| C | -4.337944 | -1.064415 | -0.850971 |
| C | -2.762015 | -1.305365 | -2.641851 |

|   |           |           |           |
|---|-----------|-----------|-----------|
| C | -3.842788 | -1.813107 | -1.921504 |
| H | -5.170417 | -1.449417 | -0.268619 |
| H | -2.362352 | -1.875978 | -3.477379 |
| C | 0.229431  | -2.832196 | -0.195697 |
| H | 0.603523  | -1.950613 | -0.732080 |
| H | 1.086748  | -3.244667 | 0.349104  |
| H | -0.091813 | -3.578081 | -0.929090 |
| C | -4.467475 | -3.663400 | 1.488703  |
| H | -4.426382 | -4.511100 | 2.185531  |
| H | -5.330098 | -3.051660 | 1.774428  |
| H | -4.655101 | -4.070597 | 0.490952  |
| C | -1.672729 | 0.034597  | 3.508482  |
| H | -0.880116 | -0.165837 | 4.239744  |
| H | -1.391107 | 0.951224  | 2.976543  |
| H | -2.602885 | 0.217265  | 4.054600  |
| C | -1.052964 | 0.445893  | -3.200068 |
| H | -0.990001 | 1.536080  | -3.190046 |
| H | -0.091454 | 0.065741  | -2.829911 |
| H | -1.175249 | 0.108960  | -4.235512 |
| C | -4.302157 | 0.935601  | 0.687400  |
| H | -3.478450 | 1.252851  | 1.334919  |
| H | -4.842696 | 1.842028  | 0.388690  |
| H | -4.981936 | 0.315273  | 1.277722  |
| C | -4.441134 | -3.151572 | -2.278206 |
| H | -3.826216 | -3.974850 | -1.891640 |
| H | -5.446087 | -3.266326 | -1.859286 |
| H | -4.507963 | -3.284004 | -3.363719 |
| C | 3.023379  | -0.611705 | -2.287102 |
| O | 1.848854  | -0.225974 | -1.656676 |
| C | 3.746529  | -1.728373 | -1.534551 |
| C | 4.638127  | -2.587142 | -2.187551 |

|   |          |           |           |
|---|----------|-----------|-----------|
| C | 3.560330 | -1.882927 | -0.158324 |
| C | 5.331805 | -3.572229 | -1.482930 |
| H | 4.785627 | -2.485762 | -3.261404 |
| C | 4.250237 | -2.865219 | 0.552972  |
| H | 2.844273 | -1.236150 | 0.328023  |
| C | 5.141438 | -3.714657 | -0.106216 |
| H | 6.016107 | -4.233970 | -2.008628 |
| H | 4.081005 | -2.971784 | 1.622062  |
| H | 5.676049 | -4.485303 | 0.443364  |
| C | 4.006245 | 0.570075  | -2.462021 |
| H | 4.921106 | 0.265074  | -2.984320 |
| H | 3.531102 | 1.380041  | -3.026120 |
| H | 4.292465 | 0.957886  | -1.475686 |
| H | 1.511678 | 1.100072  | -1.839117 |
| H | 1.173232 | 1.986682  | -1.820357 |
| C | 2.476716 | 2.837105  | 1.952399  |
| H | 1.767222 | 2.796707  | 2.783332  |
| H | 3.235966 | 3.599557  | 2.200407  |
| C | 0.741539 | 4.244679  | 1.086949  |
| H | 1.243395 | 5.145910  | 1.487188  |
| H | 0.114149 | 3.827094  | 1.879395  |
| C | 2.700953 | 3.736723  | -0.262011 |
| H | 3.193775 | 4.661229  | 0.089936  |
| H | 3.461205 | 2.979450  | -0.456867 |
| H | 2.197861 | 3.916849  | -1.210279 |

### 1-L3

(U)B3LYP-D3(BJ) SCF energy: -1621.52558802 a.u.

(U)B3LYP-D3(BJ) enthalpy: -1620.904208 a.u.

(U)B3LYP-D3(BJ) free energy: -1621.006851 a.u.  
(U)B3LYP-D3(BJ) SCF energy in solution: -1621.96236891 a.u.  
(U)B3LYP-D3(BJ) enthalpy in solution: -1621.340989 a.u.  
(U)B3LYP-D3(BJ) free energy in solution: -1621.443632 a.u.

Cartesian coordinates

| ATOM | X         | Y         | Z         |
|------|-----------|-----------|-----------|
| Co   | -1.545488 | -0.263981 | -1.184243 |
| N    | -3.450159 | -0.154427 | -0.357640 |
| C    | -3.406607 | -2.534646 | 0.113454  |
| C    | -4.014728 | -1.182879 | 0.341344  |
| C    | -4.094329 | 1.050013  | -0.302870 |
| C    | -3.497317 | 2.119168  | -1.165422 |
| H    | -4.132305 | 3.007890  | -1.184470 |
| H    | -3.377124 | 1.735381  | -2.189865 |
| H    | -1.356981 | -0.481156 | -2.786337 |
| N    | -2.175247 | 2.525097  | -0.687681 |
| C    | -1.141683 | 1.634445  | -0.563413 |
| C    | -1.808896 | 3.822498  | -0.366634 |
| C    | -0.499867 | 3.772274  | -0.026916 |
| H    | -2.499559 | 4.649915  | -0.418686 |
| H    | 0.192866  | 4.542206  | 0.272532  |
| N    | -0.106913 | 2.436638  | -0.145628 |
| H    | -3.962782 | -3.296851 | 0.663966  |
| H    | -3.460075 | -2.769490 | -0.960881 |
| N    | -2.004394 | -2.635613 | 0.515813  |
| C    | -1.476854 | -3.702638 | 1.230248  |
| C    | -1.033738 | -1.801781 | 0.026147  |
| C    | -0.132010 | -3.550352 | 1.206389  |
| H    | -2.098244 | -4.460732 | 1.681581  |
| H    | 0.663949  | -4.145713 | 1.623887  |

|   |           |           |           |
|---|-----------|-----------|-----------|
| N | 0.123758  | -2.391320 | 0.471183  |
| C | 1.252002  | 2.068100  | 0.120630  |
| C | 2.116871  | 1.799078  | -0.950355 |
| C | 1.712510  | 2.154138  | 1.443344  |
| C | 3.482703  | 1.698710  | -0.670893 |
| C | 3.086137  | 2.047430  | 1.670742  |
| C | 3.988798  | 1.850953  | 0.622066  |
| H | 4.169157  | 1.517923  | -1.494048 |
| H | 3.458669  | 2.134814  | 2.689328  |
| C | 1.461498  | -2.019509 | 0.116932  |
| C | 2.311624  | -1.534703 | 1.119831  |
| C | 1.917936  | -2.281284 | -1.185425 |
| C | 3.660013  | -1.352988 | 0.807155  |
| C | 3.268495  | -2.046894 | -1.457189 |
| C | 4.156527  | -1.603623 | -0.473763 |
| H | 4.332729  | -0.998942 | 1.583227  |
| H | 3.640638  | -2.249605 | -2.458871 |
| C | 1.597392  | 1.668764  | -2.357806 |
| H | 0.895686  | 0.832227  | -2.452512 |
| H | 1.047358  | 2.567258  | -2.662706 |
| H | 2.422001  | 1.513973  | -3.059673 |
| C | 5.471624  | 1.783176  | 0.892399  |
| H | 6.051835  | 1.948237  | -0.020808 |
| H | 5.776141  | 2.535224  | 1.628636  |
| H | 5.762794  | 0.803200  | 1.290511  |
| C | 0.751862  | 2.373660  | 2.586608  |
| H | 0.411879  | 3.414756  | 2.646462  |
| H | -0.143691 | 1.754622  | 2.470188  |
| H | 1.226681  | 2.123275  | 3.539839  |
| C | 1.002993  | -2.836883 | -2.244887 |
| H | 0.464610  | -3.718979 | -1.877676 |

|   |           |           |           |
|---|-----------|-----------|-----------|
| H | 0.242553  | -2.104108 | -2.542268 |
| H | 1.575477  | -3.128041 | -3.130778 |
| C | 1.787861  | -1.231944 | 2.501362  |
| H | 0.837534  | -0.692494 | 2.447338  |
| H | 1.606787  | -2.144253 | 3.083558  |
| H | 2.502316  | -0.615899 | 3.053759  |
| C | 5.611569  | -1.379484 | -0.803390 |
| H | 5.772087  | -0.379219 | -1.225615 |
| H | 6.242951  | -1.461009 | 0.087402  |
| H | 5.969408  | -2.104688 | -1.541964 |
| C | -5.216055 | 1.273377  | 0.481085  |
| H | -5.675442 | 2.257958  | 0.483847  |
| C | -5.128985 | -1.022312 | 1.149436  |
| H | -5.522770 | -1.879325 | 1.688545  |
| C | -5.751452 | 0.229735  | 1.242756  |
| H | -6.633633 | 0.374923  | 1.856998  |

## 2-L3

(U)B3LYP-D3(BJ) SCF energy: -2006.46856619 a.u.

(U)B3LYP-D3(BJ) enthalpy: -2005.697595 a.u.

(U)B3LYP-D3(BJ) free energy: -2005.823405 a.u.

(U)B3LYP-D3(BJ) SCF energy in solution: -2007.01916457 a.u.

(U)B3LYP-D3(BJ) enthalpy in solution: -2006.248193 a.u.

(U)B3LYP-D3(BJ) free energy in solution: -2006.374003 a.u.

Cartesian coordinates

| ATOM | X        | Y         | Z         |
|------|----------|-----------|-----------|
| Co   | 0.715805 | -0.268864 | 0.338721  |
| N    | 2.317175 | -0.249978 | -0.999659 |



|   |           |           |           |
|---|-----------|-----------|-----------|
| C | 2.086380  | -2.642633 | -1.385877 |
| C | 2.645222  | -1.310353 | -1.791415 |
| C | 2.946796  | 0.931037  | -1.262295 |
| C | 2.627783  | 2.041162  | -0.309253 |
| H | 3.269359  | 2.906354  | -0.485619 |
| H | 2.779566  | 1.690239  | 0.718963  |
| H | 0.960602  | -0.393078 | 1.954140  |
| N | 1.236250  | 2.475078  | -0.433238 |
| C | 0.189290  | 1.615510  | -0.230266 |
| C | 0.825337  | 3.771997  | -0.694106 |
| C | -0.527586 | 3.755083  | -0.656310 |
| H | 1.522651  | 4.576398  | -0.870440 |
| H | -1.258417 | 4.537413  | -0.783715 |
| N | -0.902561 | 2.437852  | -0.377642 |
| H | 2.429803  | -3.415002 | -2.077283 |
| H | 2.465836  | -2.892263 | -0.388032 |
| N | 0.624646  | -2.698766 | -1.353470 |
| C | -0.114690 | -3.760607 | -1.855480 |
| C | -0.139508 | -1.827867 | -0.623029 |
| C | -1.389803 | -3.568863 | -1.443564 |
| H | 0.330027  | -4.544960 | -2.448360 |
| H | -2.286731 | -4.147575 | -1.594662 |
| N | -1.390887 | -2.390523 | -0.694618 |
| C | -2.288472 | 2.108941  | -0.225534 |
| C | -2.812896 | 1.911688  | 1.060511  |
| C | -3.109905 | 2.161799  | -1.361796 |
| C | -4.202877 | 1.847169  | 1.191283  |
| C | -4.492679 | 2.093172  | -1.178857 |
| C | -5.057744 | 1.966204  | 0.093002  |
| H | -4.625811 | 1.721836  | 2.184743  |
| H | -5.141817 | 2.155007  | -2.049930 |

|   |           |           |           |
|---|-----------|-----------|-----------|
| C | -2.557996 | -1.968052 | 0.020011  |
| C | -3.653978 | -1.487017 | -0.709188 |
| C | -2.620496 | -2.175802 | 1.407797  |
| C | -4.847204 | -1.250999 | -0.024182 |
| C | -3.826398 | -1.887876 | 2.052590  |
| C | -4.952617 | -1.444310 | 1.354777  |
| H | -5.709305 | -0.898965 | -0.583626 |
| H | -3.893942 | -2.048176 | 3.126280  |
| C | -1.911753 | 1.820157  | 2.263704  |
| H | -1.231253 | 0.963817  | 2.193608  |
| H | -1.277126 | 2.710337  | 2.352122  |
| H | -2.501869 | 1.724207  | 3.179876  |
| C | -6.556464 | 1.935765  | 0.264579  |
| H | -6.844526 | 2.155085  | 1.297450  |
| H | -7.046309 | 2.667622  | -0.387192 |
| H | -6.969417 | 0.950734  | 0.013656  |
| C | -2.515755 | 2.307199  | -2.741560 |
| H | -2.187796 | 3.334260  | -2.943302 |
| H | -1.636454 | 1.665541  | -2.859004 |
| H | -3.249770 | 2.035869  | -3.506045 |
| C | -1.449461 | -2.730116 | 2.175898  |
| H | -1.051348 | -3.630522 | 1.692891  |
| H | -0.626649 | -2.005973 | 2.223709  |
| H | -1.749256 | -2.990419 | 3.195705  |
| C | -3.552362 | -1.245331 | -2.194452 |
| H | -2.611162 | -0.746609 | -2.444071 |
| H | -3.582502 | -2.180303 | -2.767991 |
| H | -4.377361 | -0.614248 | -2.535227 |
| C | -6.241431 | -1.158676 | 2.085055  |
| H | -6.251540 | -0.136332 | 2.484233  |
| H | -7.108651 | -1.257334 | 1.423927  |

|   |           |           |           |
|---|-----------|-----------|-----------|
| H | -6.379601 | -1.839318 | 2.931863  |
| C | 3.826612  | 1.101802  | -2.321698 |
| H | 4.292683  | 2.071259  | -2.472741 |
| C | 3.513447  | -1.204203 | -2.866887 |
| H | 3.733281  | -2.086495 | -3.460346 |
| C | 4.121473  | 0.023008  | -3.157371 |
| H | 4.817063  | 0.123356  | -3.983971 |
| C | 4.329746  | -1.666204 | 1.403149  |
| O | 4.673656  | -2.298596 | 0.410550  |
| C | 4.748711  | -0.238969 | 1.568960  |
| C | 4.346978  | 0.541165  | 2.663110  |
| C | 5.569698  | 0.330690  | 0.585358  |
| C | 4.771851  | 1.864216  | 2.777409  |
| H | 3.683273  | 0.125351  | 3.412139  |
| C | 5.992875  | 1.651988  | 0.698679  |
| H | 5.852330  | -0.282630 | -0.262814 |
| C | 5.597124  | 2.420960  | 1.796970  |
| H | 4.452115  | 2.462617  | 3.625594  |
| H | 6.627999  | 2.084993  | -0.069389 |
| H | 5.928629  | 3.452035  | 1.887630  |
| C | 3.476797  | -2.301315 | 2.477698  |
| H | 2.497293  | -1.803928 | 2.496269  |
| H | 3.348464  | -3.360953 | 2.246789  |
| H | 3.935019  | -2.195925 | 3.468220  |

### 5-L3

(U)B3LYP-D3(BJ) SCF energy: -2006.51244965 a.u.

(U)B3LYP-D3(BJ) enthalpy: -2005.736275 a.u.

(U)B3LYP-D3(BJ) free energy: -2005.857705 a.u.

(U)B3LYP-D3(BJ) SCF energy in solution: -2007.05302486 a.u.

(U)B3LYP-D3(BJ) enthalpy in solution: -2006.276850 a.u.

(U)B3LYP-D3(BJ) free energy in solution: -2006.398280 a.u.

Cartesian coordinates

| ATOM | X         | Y         | Z         |
|------|-----------|-----------|-----------|
| Co   | -1.017938 | -0.352991 | -0.165501 |
| N    | -2.585863 | -0.788842 | 1.089385  |
| C    | -2.254710 | -3.169330 | 0.692309  |
| C    | -2.867867 | -2.068481 | 1.502625  |
| C    | -3.286544 | 0.213440  | 1.718238  |
| C    | -3.081722 | 1.590900  | 1.167549  |
| H    | -3.733019 | 2.306058  | 1.673796  |
| H    | -3.315035 | 1.606816  | 0.099734  |
| H    | -1.168112 | 1.658053  | -2.848248 |
| N    | -1.700455 | 2.061868  | 1.333466  |
| C    | -0.622204 | 1.367913  | 0.862047  |
| C    | -1.343992 | 3.262660  | 1.923743  |
| C    | 0.004144  | 3.347294  | 1.829349  |
| H    | -2.072165 | 3.940818  | 2.340844  |
| H    | 0.697867  | 4.112491  | 2.137752  |
| N    | 0.431830  | 2.184872  | 1.185128  |
| H    | -2.584261 | -4.141250 | 1.065999  |
| H    | -2.575697 | -3.074470 | -0.355668 |
| N    | -0.789095 | -3.171997 | 0.696219  |
| C    | -0.008637 | -4.303335 | 0.886110  |
| C    | -0.054080 | -2.094380 | 0.291895  |
| C    | 1.263962  | -3.939825 | 0.596579  |
| H    | -0.424095 | -5.247019 | 1.204245  |
| H    | 2.187631  | -4.495918 | 0.600246  |
| N    | 1.219092  | -2.592970 | 0.235748  |

|   |          |           |           |
|---|----------|-----------|-----------|
| C | 1.826045 | 1.984047  | 0.917861  |
| C | 2.308942 | 2.100183  | -0.394264 |
| C | 2.688195 | 1.836712  | 2.016736  |
| C | 3.695542 | 2.156506  | -0.569479 |
| C | 4.063375 | 1.899751  | 1.787976  |
| C | 4.584084 | 2.093563  | 0.505504  |
| H | 4.086216 | 2.274474  | -1.576875 |
| H | 4.741607 | 1.809260  | 2.634043  |
| C | 2.367330 | -1.935239 | -0.319326 |
| C | 3.404761 | -1.552391 | 0.539522  |
| C | 2.469658 | -1.828869 | -1.716165 |
| C | 4.591269 | -1.087968 | -0.031985 |
| C | 3.665974 | -1.326980 | -2.235704 |
| C | 4.739894 | -0.970983 | -1.415718 |
| H | 5.412418 | -0.807827 | 0.621727  |
| H | 3.770205 | -1.245088 | -3.315293 |
| C | 1.376626 | 2.197576  | -1.572540 |
| H | 0.858802 | 1.247953  | -1.755210 |
| H | 0.598583 | 2.950781  | -1.403517 |
| H | 1.929297 | 2.469768  | -2.476719 |
| C | 6.073778 | 2.214333  | 0.299622  |
| H | 6.517808 | 2.910961  | 1.019869  |
| H | 6.577103 | 1.248748  | 0.431757  |
| H | 6.310754 | 2.571989  | -0.706783 |
| C | 2.148346 | 1.628941  | 3.411432  |
| H | 1.811308 | 2.566235  | 3.870576  |
| H | 1.288390 | 0.951656  | 3.404271  |
| H | 2.920144 | 1.202409  | 4.058907  |
| C | 1.353310 | -2.265967 | -2.626759 |
| H | 0.976453 | -3.256150 | -2.343544 |
| H | 0.506041 | -1.566983 | -2.579843 |

|   |           |           |           |
|---|-----------|-----------|-----------|
| H | 1.707387  | -2.320085 | -3.661259 |
| C | 3.248758  | -1.659800 | 2.035580  |
| H | 2.283716  | -1.255597 | 2.356142  |
| H | 3.290777  | -2.701080 | 2.379334  |
| H | 4.040703  | -1.103711 | 2.544208  |
| C | 6.020828  | -0.455453 | -2.023771 |
| H | 5.939870  | 0.610300  | -2.272583 |
| H | 6.866012  | -0.566767 | -1.337178 |
| H | 6.262997  | -0.986406 | -2.950788 |
| C | -4.150792 | -0.014608 | 2.774337  |
| H | -4.661860 | 0.830001  | 3.228337  |
| C | -3.721076 | -2.355568 | 2.553784  |
| H | -3.887823 | -3.393138 | 2.830371  |
| C | -4.380790 | -1.319945 | 3.231157  |
| H | -5.065852 | -1.522917 | 4.046835  |
| C | -1.689488 | 0.679216  | -2.863601 |
| O | -1.021060 | -0.248185 | -2.072559 |
| C | -3.117244 | 0.948554  | -2.395871 |
| C | -3.656727 | 2.239027  | -2.424172 |
| C | -3.911629 | -0.097394 | -1.908690 |
| C | -4.952044 | 2.487309  | -1.961755 |
| H | -3.046955 | 3.059942  | -2.796418 |
| C | -5.202750 | 0.143477  | -1.441435 |
| H | -3.487549 | -1.095002 | -1.870720 |
| C | -5.727327 | 1.439331  | -1.462080 |
| H | -5.350185 | 3.498838  | -1.981307 |
| H | -5.797287 | -0.676982 | -1.047950 |
| H | -6.730310 | 1.629562  | -1.089387 |
| C | -1.695655 | 0.194385  | -4.324493 |
| H | -2.175917 | 0.919139  | -4.993488 |
| H | -0.664788 | 0.031780  | -4.657957 |

H -2.234189 -0.757547 -4.395731

### TS1-L3

(U)B3LYP-D3(BJ) SCF energy: -2006.45710848 a.u.

(U)B3LYP-D3(BJ) enthalpy: -2005.687058 a.u.

(U)B3LYP-D3(BJ) free energy: -2005.810787 a.u.

(U)B3LYP-D3(BJ) SCF energy in solution: -2007.00663580 a.u.

(U)B3LYP-D3(BJ) enthalpy in solution: -2006.236585 a.u.

(U)B3LYP-D3(BJ) free energy in solution: -2006.360314 a.u.

Imaginary frequency: -391.4414 cm<sup>-1</sup>

### Cartesian coordinates

| ATOM | X         | Y         | Z         |
|------|-----------|-----------|-----------|
| Co   | 0.878614  | 0.197151  | -0.137023 |
| N    | 2.509039  | -0.088059 | 1.174088  |
| C    | 2.299309  | 2.223939  | 1.905403  |
| C    | 2.856512  | 0.838888  | 2.096560  |
| C    | 3.139648  | -1.283987 | 1.209212  |
| C    | 2.799547  | -2.226208 | 0.088680  |
| H    | 3.417368  | -3.125102 | 0.140225  |
| H    | 2.992834  | -1.727213 | -0.865968 |
| H    | 1.399288  | 0.745858  | -1.660158 |
| N    | 1.398466  | -2.636445 | 0.122571  |
| C    | 0.370814  | -1.730287 | 0.025557  |
| C    | 0.954534  | -3.947807 | 0.196482  |
| C    | -0.396226 | -3.894653 | 0.138032  |
| H    | 1.630775  | -4.785580 | 0.268630  |
| H    | -1.144195 | -4.671018 | 0.140575  |
| N    | -0.739480 | -2.543127 | 0.037929  |

|   |           |           |           |
|---|-----------|-----------|-----------|
| H | 2.661824  | 2.882000  | 2.698287  |
| H | 2.644655  | 2.592564  | 0.928930  |
| N | 0.835431  | 2.297674  | 1.910782  |
| C | 0.123157  | 3.284595  | 2.576811  |
| C | 0.047636  | 1.573470  | 1.057913  |
| C | -1.157598 | 3.190602  | 2.148117  |
| H | 0.588226  | 3.958166  | 3.279809  |
| H | -2.038958 | 3.761278  | 2.391996  |
| N | -1.188714 | 2.144303  | 1.224175  |
| C | -2.113620 | -2.156765 | -0.072441 |
| C | -2.615499 | -1.724355 | -1.308613 |
| C | -2.951915 | -2.372524 | 1.032529  |
| C | -4.001224 | -1.595588 | -1.438485 |
| C | -4.329271 | -2.234004 | 0.851651  |
| C | -4.873861 | -1.877431 | -0.385118 |
| H | -4.407074 | -1.286517 | -2.398309 |
| H | -4.991395 | -2.421110 | 1.694585  |
| C | -2.357048 | 1.881345  | 0.438153  |
| C | -3.486914 | 1.344380  | 1.068514  |
| C | -2.378569 | 2.291820  | -0.905389 |
| C | -4.674127 | 1.268414  | 0.336947  |
| C | -3.581376 | 2.162022  | -1.603768 |
| C | -4.741896 | 1.673863  | -0.997089 |
| H | -5.562352 | 0.874431  | 0.823197  |
| H | -3.617426 | 2.482500  | -2.642584 |
| C | -1.697181 | -1.447137 | -2.470163 |
| H | -1.023175 | -0.610522 | -2.253941 |
| H | -1.057913 | -2.310924 | -2.687811 |
| H | -2.273099 | -1.206621 | -3.368483 |
| C | -6.369144 | -1.783560 | -0.562744 |
| H | -6.644252 | -1.748540 | -1.621245 |



|   |           |           |           |
|---|-----------|-----------|-----------|
| H | -6.877267 | -2.641844 | -0.108875 |
| H | -6.773854 | -0.880633 | -0.089411 |
| C | -2.381014 | -2.754792 | 2.376507  |
| H | -2.088443 | -3.811076 | 2.417597  |
| H | -1.483944 | -2.168266 | 2.600506  |
| H | -3.116549 | -2.582496 | 3.167764  |
| C | -1.162824 | 2.883538  | -1.567689 |
| H | -0.710772 | 3.671315  | -0.955627 |
| H | -0.382052 | 2.129204  | -1.714009 |
| H | -1.424139 | 3.307439  | -2.541943 |
| C | -3.427374 | 0.869230  | 2.498718  |
| H | -2.509048 | 0.303556  | 2.682443  |
| H | -3.440527 | 1.702106  | 3.212908  |
| H | -4.280552 | 0.222588  | 2.721141  |
| C | -6.025777 | 1.565509  | -1.781851 |
| H | -6.042642 | 0.650955  | -2.388438 |
| H | -6.898900 | 1.534778  | -1.122273 |
| H | -6.146587 | 2.411074  | -2.467593 |
| C | 4.072310  | -1.614923 | 2.187512  |
| H | 4.548771  | -2.590153 | 2.166186  |
| C | 3.776968  | 0.573459  | 3.106194  |
| H | 4.017591  | 1.348262  | 3.827463  |
| C | 4.397394  | -0.676096 | 3.163623  |
| H | 5.127035  | -0.901278 | 3.935230  |
| C | 2.615011  | 1.767465  | -1.963277 |
| O | 2.678962  | 2.682335  | -1.097188 |
| C | 3.704045  | 0.697136  | -1.962780 |
| C | 3.773489  | -0.336161 | -2.909880 |
| C | 4.701875  | 0.770453  | -0.984903 |
| C | 4.797142  | -1.281227 | -2.862943 |
| H | 3.006489  | -0.419479 | -3.673201 |

|   |          |           |           |
|---|----------|-----------|-----------|
| C | 5.719177 | -0.182518 | -0.923746 |
| H | 4.651204 | 1.587232  | -0.274217 |
| C | 5.771919 | -1.215349 | -1.861415 |
| H | 4.831874 | -2.075647 | -3.604568 |
| H | 6.473239 | -0.116484 | -0.143246 |
| H | 6.566808 | -1.955554 | -1.820834 |
| C | 2.077766 | 2.151050  | -3.348382 |
| H | 1.763551 | 1.295835  | -3.951933 |
| H | 1.230825 | 2.827618  | -3.220874 |
| H | 2.870509 | 2.690289  | -3.886221 |

### TS3-L3

(U)B3LYP-D3(BJ) SCF energy: -2007.65240767 a.u.  
 (U)B3LYP-D3(BJ) enthalpy: -2006.861879 a.u.  
 (U)B3LYP-D3(BJ) free energy: -2006.986250 a.u.  
 (U)B3LYP-D3(BJ) SCF energy in solution: -2008.20227923 a.u.  
 (U)B3LYP-D3(BJ) enthalpy in solution: -2007.411751 a.u.  
 (U)B3LYP-D3(BJ) free energy in solution: -2007.536122 a.u.  
 Imaginary frequency: -756.4685 cm<sup>-1</sup>

### Cartesian coordinates

| ATOM | X         | Y         | Z         |
|------|-----------|-----------|-----------|
| Co   | -1.329124 | -0.505863 | -0.668133 |
| N    | -2.888650 | -1.716876 | 0.078559  |
| C    | -2.176950 | -3.438746 | -1.478062 |
| C    | -2.916011 | -3.029113 | -0.228982 |
| C    | -3.680210 | -1.260070 | 1.071714  |
| C    | -3.626769 | 0.230433  | 1.302626  |
| H    | -4.381587 | 0.536492  | 2.030856  |

|   |           |           |           |
|---|-----------|-----------|-----------|
| H | -3.777995 | 0.750368  | 0.347077  |
| H | -1.741335 | 2.009731  | -2.888126 |
| N | -2.314031 | 0.622658  | 1.819654  |
| C | -1.158630 | 0.358720  | 1.132220  |
| C | -2.077578 | 1.175061  | 3.069479  |
| C | -0.731734 | 1.270436  | 3.193023  |
| H | -2.875478 | 1.461379  | 3.737200  |
| H | -0.108077 | 1.639923  | 3.991238  |
| N | -0.188089 | 0.763117  | 2.011024  |
| H | -2.354970 | -4.498312 | -1.677563 |
| H | -2.583808 | -2.845767 | -2.310405 |
| N | -0.729368 | -3.235494 | -1.459741 |
| C | 0.145910  | -4.083640 | -2.130448 |
| C | -0.144187 | -2.035977 | -1.127163 |
| C | 1.331584  | -3.439379 | -2.193329 |
| H | -0.152121 | -5.054812 | -2.494684 |
| H | 2.275049  | -3.730943 | -2.623674 |
| N | 1.155809  | -2.203992 | -1.560739 |
| C | 1.213159  | 0.464162  | 1.930967  |
| C | 2.112062  | 1.456256  | 1.525400  |
| C | 1.642249  | -0.789855 | 2.390879  |
| C | 3.477222  | 1.191819  | 1.661290  |
| C | 3.016035  | -1.006831 | 2.511073  |
| C | 3.946061  | -0.019698 | 2.173022  |
| H | 4.189443  | 1.955260  | 1.358727  |
| H | 3.365969  | -1.968353 | 2.879104  |
| C | 2.244971  | -1.278084 | -1.437521 |
| C | 3.432056  | -1.732591 | -0.835804 |
| C | 2.163027  | 0.011949  | -1.993837 |
| C | 4.556020  | -0.904304 | -0.869240 |
| C | 3.306538  | 0.814741  | -1.964763 |

|   |           |           |           |
|---|-----------|-----------|-----------|
| C | 4.516526  | 0.371756  | -1.428470 |
| H | 5.478510  | -1.260814 | -0.418307 |
| H | 3.247371  | 1.811729  | -2.395291 |
| C | 1.614965  | 2.759393  | 0.962609  |
| H | 0.945125  | 2.597792  | 0.112852  |
| H | 1.036532  | 3.329412  | 1.696224  |
| H | 2.448762  | 3.383044  | 0.627908  |
| C | 5.424090  | -0.255285 | 2.364115  |
| H | 5.744971  | 0.035940  | 3.373102  |
| H | 5.681378  | -1.312251 | 2.235396  |
| H | 6.016663  | 0.327288  | 1.651700  |
| C | 0.643004  | -1.866248 | 2.729780  |
| H | -0.075965 | -1.527936 | 3.485396  |
| H | 0.065302  | -2.138154 | 1.838104  |
| H | 1.147477  | -2.759234 | 3.111087  |
| C | 0.905174  | 0.548756  | -2.619147 |
| H | 0.375802  | -0.201641 | -3.209305 |
| H | 0.197475  | 0.895921  | -1.853348 |
| H | 1.130002  | 1.408700  | -3.257757 |
| C | 3.518598  | -3.066286 | -0.131623 |
| H | 2.580340  | -3.307230 | 0.375915  |
| H | 3.743037  | -3.894622 | -0.814467 |
| H | 4.314399  | -3.038512 | 0.618109  |
| C | 5.728167  | 1.269453  | -1.403921 |
| H | 5.698549  | 1.946174  | -0.539196 |
| H | 6.655172  | 0.690797  | -1.334498 |
| H | 5.783411  | 1.895543  | -2.300934 |
| C | -4.482798 | -2.113389 | 1.826378  |
| H | -5.104971 | -1.708759 | 2.618826  |
| C | -3.681356 | -3.940794 | 0.495038  |
| H | -3.668937 | -4.992493 | 0.225829  |

|   |           |           |           |
|---|-----------|-----------|-----------|
| C | -4.475081 | -3.479043 | 1.545988  |
| H | -5.087333 | -4.167098 | 2.120918  |
| C | -2.486339 | 2.341293  | -2.134989 |
| O | -2.991076 | 1.237727  | -1.447579 |
| C | -1.782270 | 3.342852  | -1.225270 |
| C | -0.757686 | 4.161492  | -1.715491 |
| C | -2.192288 | 3.515542  | 0.101258  |
| C | -0.170571 | 5.140375  | -0.911258 |
| H | -0.422480 | 4.032847  | -2.742980 |
| C | -1.607404 | 4.487460  | 0.912099  |
| H | -2.976710 | 2.875955  | 0.485880  |
| C | -0.597746 | 5.310484  | 0.406960  |
| H | 0.622474  | 5.767052  | -1.312015 |
| H | -1.937515 | 4.600396  | 1.941921  |
| H | -0.141079 | 6.069406  | 1.036932  |
| C | -3.616922 | 3.054793  | -2.901946 |
| H | -3.246809 | 3.914024  | -3.475744 |
| H | -4.093789 | 2.346598  | -3.587975 |
| H | -4.373502 | 3.411523  | -2.193489 |
| H | -2.517546 | 0.192273  | -2.074214 |
| H | -2.005250 | -0.555404 | -2.445335 |

#### L4

(U)B3LYP-D3(BJ) SCF energy: -1369.53317016 a.u.

(U)B3LYP-D3(BJ) enthalpy: -1368.990659 a.u.

(U)B3LYP-D3(BJ) free energy: -1369.078403 a.u.

(U)B3LYP-D3(BJ) SCF energy in solution: -1369.82032375 a.u.

(U)B3LYP-D3(BJ) enthalpy in solution: -1369.277813 a.u.

(U)B3LYP-D3(BJ) free energy in solution: -1369.365557 a.u.

Cartesian coordinates

| ATOM | X         | Y         | Z         |
|------|-----------|-----------|-----------|
| P    | 4.060587  | -0.315695 | -0.544509 |
| N    | 0.014825  | -0.020191 | 0.354164  |
| C    | -1.205922 | 0.010729  | -0.447169 |
| C    | 1.223037  | -0.191125 | -0.448239 |
| C    | 2.461752  | -0.275018 | 0.445588  |
| C    | 5.109826  | -1.351636 | 0.642700  |
| C    | 5.390805  | -0.717393 | 2.009504  |
| C    | 6.398978  | -1.848295 | -0.028048 |
| C    | 4.648543  | 1.453206  | -0.250282 |
| C    | 6.063515  | 1.667071  | -0.802333 |
| C    | 3.664543  | 2.433863  | -0.905196 |
| H    | -1.311062 | -0.877171 | -1.099464 |
| H    | 1.299291  | 0.673236  | -1.119525 |
| H    | 1.185610  | -1.081625 | -1.104573 |
| H    | 2.413141  | -1.197113 | 1.040560  |
| H    | 2.453420  | 0.560835  | 1.155617  |
| H    | 6.056475  | 0.147940  | 1.917695  |
| H    | 5.884171  | -1.438206 | 2.674368  |
| H    | 4.471907  | -0.382972 | 2.502976  |
| H    | 6.187994  | -2.328607 | -0.989074 |
| H    | 6.908219  | -2.577553 | 0.614871  |
| H    | 7.102589  | -1.030158 | -0.213365 |
| H    | 6.809977  | 1.076352  | -0.263464 |
| H    | 6.351781  | 2.722400  | -0.715413 |
| H    | 6.118969  | 1.391845  | -1.862332 |
| H    | 3.565958  | 2.236834  | -1.979630 |
| H    | 4.022237  | 3.464411  | -0.786420 |
| H    | 2.667231  | 2.377850  | -0.458059 |

|   |           |           |           |
|---|-----------|-----------|-----------|
| H | -0.048674 | -0.789598 | 1.021305  |
| H | -1.144854 | 0.873619  | -1.122377 |
| C | -2.438017 | 0.157495  | 0.446772  |
| H | -2.495454 | -0.683254 | 1.152692  |
| H | -2.319349 | 1.065708  | 1.048666  |
| P | -4.034329 | 0.294720  | -0.539686 |
| C | -4.747067 | -1.424485 | -0.228103 |
| C | -5.002181 | 1.413730  | 0.640882  |
| C | -3.850321 | -2.475496 | -0.898415 |
| H | -4.270356 | -3.479301 | -0.756676 |
| H | -3.769842 | -2.295429 | -1.977098 |
| H | -2.837365 | -2.479511 | -0.483461 |
| C | -6.183527 | -1.537412 | -0.754121 |
| H | -6.543744 | -2.570045 | -0.662899 |
| H | -6.876515 | -0.896927 | -0.201128 |
| H | -6.238805 | -1.256847 | -1.812727 |
| C | -6.256138 | 1.993873  | -0.029517 |
| H | -6.709099 | 2.763469  | 0.608436  |
| H | -6.015862 | 2.449299  | -0.995759 |
| H | -7.017060 | 1.226350  | -0.204446 |
| C | -5.319478 | 0.815111  | 2.015779  |
| H | -6.042428 | -0.004413 | 1.937295  |
| H | -4.422589 | 0.426267  | 2.509834  |
| H | -5.759766 | 1.575303  | 2.673943  |
| H | -4.301328 | 2.248175  | 0.788169  |
| H | -4.749130 | -1.613301 | 0.853660  |
| H | 4.471119  | -2.232742 | 0.802196  |
| H | 4.655444  | 1.645520  | 0.830579  |

#### 1-L4

(U)B3LYP-D3(BJ) SCF energy: -1516.03743661 a.u.  
(U)B3LYP-D3(BJ) enthalpy: -1515.485253 a.u.  
(U)B3LYP-D3(BJ) free energy: -1515.572084 a.u.  
(U)B3LYP-D3(BJ) SCF energy in solution: -1516.32865761 a.u.  
(U)B3LYP-D3(BJ) enthalpy in solution: -1515.776474 a.u.  
(U)B3LYP-D3(BJ) free energy in solution: -1515.863305 a.u.

#### Cartesian coordinates

| ATOM | X         | Y         | Z         |
|------|-----------|-----------|-----------|
| Co   | -0.021042 | -0.880780 | -0.818379 |
| P    | -1.900072 | 0.095003  | 0.015785  |
| N    | -0.097271 | -2.099386 | 1.068296  |
| C    | 0.839885  | -1.599853 | 2.084107  |
| C    | -1.484487 | -2.240191 | 1.541207  |
| C    | -2.207581 | -0.885123 | 1.588719  |
| C    | -2.102066 | 1.850543  | 0.672428  |
| C    | -3.519518 | 2.233631  | 1.111952  |
| C    | -1.504834 | 2.881591  | -0.293909 |
| C    | -3.477823 | -0.221685 | -0.959127 |
| C    | -3.454907 | 0.568970  | -2.273918 |
| C    | -3.621016 | -1.723100 | -1.246152 |
| H    | 0.962152  | -2.321039 | 2.910378  |
| H    | -1.526576 | -2.720198 | 2.533217  |
| H    | -1.991733 | -2.900911 | 0.834215  |
| H    | -1.829787 | -0.284914 | 2.424575  |
| H    | -3.276282 | -1.045008 | 1.773676  |
| H    | -4.196844 | 2.306576  | 0.254269  |
| H    | -3.514424 | 3.212777  | 1.607430  |
| H    | -3.942765 | 1.507050  | 1.814370  |
| H    | -0.506093 | 2.577634  | -0.620841 |



|   |           |           |           |
|---|-----------|-----------|-----------|
| H | -1.427991 | 3.862982  | 0.190659  |
| H | -2.124457 | 3.003982  | -1.187904 |
| H | -3.467649 | 1.650183  | -2.107854 |
| H | -4.330730 | 0.316591  | -2.884496 |
| H | -2.557316 | 0.324440  | -2.854210 |
| H | -2.726176 | -2.112251 | -1.746335 |
| H | -4.482822 | -1.899465 | -1.901671 |
| H | -3.782475 | -2.302445 | -0.331045 |
| H | 0.232526  | -2.992119 | 0.709201  |
| H | 0.403316  | -0.691892 | 2.510413  |
| H | 0.317308  | -1.982652 | -1.986521 |
| C | 2.192182  | -1.270434 | 1.449975  |
| H | 2.878493  | -0.874106 | 2.207311  |
| H | 2.644276  | -2.188425 | 1.054432  |
| P | 1.966939  | -0.080183 | 0.010461  |
| C | 2.581220  | 1.525205  | 0.795925  |
| C | 3.394780  | -0.612223 | -1.095569 |
| C | 1.671996  | 1.927462  | 1.963082  |
| H | 2.010840  | 2.874843  | 2.400686  |
| H | 0.640197  | 2.065256  | 1.625167  |
| H | 1.668380  | 1.178922  | 2.762225  |
| C | 2.661220  | 2.654860  | -0.238161 |
| H | 2.910276  | 3.605087  | 0.251038  |
| H | 3.424026  | 2.462391  | -0.997106 |
| H | 1.703465  | 2.786819  | -0.754284 |
| C | 3.236434  | -0.061117 | -2.518961 |
| H | 3.988490  | -0.508349 | -3.181191 |
| H | 2.244702  | -0.307080 | -2.910590 |
| H | 3.369522  | 1.025282  | -2.558261 |
| C | 4.797510  | -0.368029 | -0.529264 |
| H | 5.036512  | 0.700716  | -0.490453 |

|   |           |           |           |
|---|-----------|-----------|-----------|
| H | 4.912341  | -0.774365 | 0.482292  |
| H | 5.552481  | -0.845580 | -1.166357 |
| H | 3.222837  | -1.694837 | -1.159617 |
| H | 3.587352  | 1.339291  | 1.193486  |
| H | -1.462746 | 1.832338  | 1.565773  |
| H | -4.334544 | 0.103916  | -0.355584 |

## 2-L4

(U)B3LYP-D3(BJ) SCF energy: -1900.98499670 a.u.

(U)B3LYP-D3(BJ) enthalpy: -1900.282995 a.u.

(U)B3LYP-D3(BJ) free energy: -1900.391899 a.u.

(U)B3LYP-D3(BJ) SCF energy in solution: -1901.38623330 a.u.

(U)B3LYP-D3(BJ) enthalpy in solution: -1900.684232 a.u.

(U)B3LYP-D3(BJ) free energy in solution: -1900.793136 a.u.

## Cartesian coordinates

| ATOM | X         | Y         | Z         |
|------|-----------|-----------|-----------|
| Co   | -0.265473 | -0.022970 | -0.665787 |
| P    | -0.549166 | -2.198805 | -0.023876 |
| N    | 0.652226  | 0.186044  | 1.384296  |
| C    | -0.332019 | 0.645902  | 2.377730  |
| C    | 1.324593  | -1.071426 | 1.749561  |
| C    | 0.388138  | -2.279571 | 1.601126  |
| C    | -2.125416 | -3.116461 | 0.456506  |
| C    | -1.948485 | -4.594075 | 0.823150  |
| C    | -3.232777 | -2.922074 | -0.588117 |
| C    | 0.405499  | -3.433174 | -1.077199 |
| C    | -0.219659 | -3.532935 | -2.474793 |
| C    | 1.871991  | -2.994140 | -1.190020 |

|   |           |           |           |
|---|-----------|-----------|-----------|
| H | 0.152361  | 0.862142  | 3.345194  |
| H | 1.717993  | -1.031150 | 2.779346  |
| H | 2.178522  | -1.175023 | 1.077775  |
| H | -0.352426 | -2.288519 | 2.409083  |
| H | 0.965432  | -3.206357 | 1.695629  |
| H | -1.681671 | -5.191698 | -0.055294 |
| H | -2.883880 | -5.004611 | 1.224709  |
| H | -1.168821 | -4.739998 | 1.578866  |
| H | -3.314068 | -1.873205 | -0.888846 |
| H | -4.201930 | -3.242571 | -0.185547 |
| H | -3.041704 | -3.512011 | -1.490020 |
| H | -1.231695 | -3.947596 | -2.449380 |
| H | 0.388330  | -4.181720 | -3.117961 |
| H | -0.266884 | -2.541307 | -2.939757 |
| H | 1.934488  | -1.973558 | -1.581686 |
| H | 2.411310  | -3.662920 | -1.873324 |
| H | 2.389930  | -3.021091 | -0.226019 |
| H | 1.352376  | 0.918237  | 1.284186  |
| H | -1.046943 | -0.165176 | 2.544204  |
| H | 0.692606  | 0.274331  | -1.983434 |
| C | -1.061632 | 1.880961  | 1.850806  |
| H | -1.826866 | 2.210206  | 2.562474  |
| H | -0.343595 | 2.698386  | 1.729967  |
| P | -1.783633 | 1.499160  | 0.160881  |
| C | -3.621566 | 1.387164  | 0.551207  |
| C | -1.577306 | 3.176230  | -0.671156 |
| C | -3.881895 | 0.263168  | 1.561516  |
| H | -4.955940 | 0.182000  | 1.770549  |
| H | -3.542547 | -0.700186 | 1.170461  |
| H | -3.372131 | 0.438338  | 2.514617  |
| C | -4.436914 | 1.165962  | -0.728827 |

|   |           |           |           |
|---|-----------|-----------|-----------|
| H | -5.494933 | 1.002834  | -0.487545 |
| H | -4.377889 | 2.023659  | -1.404506 |
| H | -4.076958 | 0.286683  | -1.275587 |
| C | -1.729381 | 3.083649  | -2.195268 |
| H | -1.407080 | 4.022338  | -2.664226 |
| H | -1.119905 | 2.267711  | -2.596563 |
| H | -2.769617 | 2.911121  | -2.492760 |
| C | -2.421078 | 4.308163  | -0.075755 |
| H | -3.487418 | 4.170236  | -0.288823 |
| H | -2.300667 | 4.383389  | 1.010838  |
| H | -2.125165 | 5.271796  | -0.509309 |
| H | -0.521108 | 3.388775  | -0.461102 |
| H | -3.927075 | 2.337106  | 1.008061  |
| H | -2.430888 | -2.574341 | 1.362683  |
| H | 0.366655  | -4.414615 | -0.587558 |
| C | 2.455492  | 2.496775  | -0.389118 |
| O | 1.840634  | 3.003154  | 0.547739  |
| C | 3.413612  | 1.380600  | -0.122663 |
| C | 3.727337  | 0.425646  | -1.099100 |
| C | 3.962123  | 1.261557  | 1.163514  |
| C | 4.574015  | -0.637789 | -0.786955 |
| H | 3.266678  | 0.484807  | -2.077707 |
| C | 4.820682  | 0.208625  | 1.468096  |
| H | 3.704298  | 2.007526  | 1.908623  |
| C | 5.123865  | -0.745696 | 0.492306  |
| H | 4.794866  | -1.388461 | -1.539698 |
| H | 5.250924  | 0.127856  | 2.462236  |
| H | 5.786478  | -1.573362 | 0.729874  |
| C | 2.236440  | 2.945934  | -1.809147 |
| H | 1.604570  | 2.183864  | -2.289505 |
| H | 1.711526  | 3.903176  | -1.812062 |

H 3.175601 3.022313 -2.366356

### 3-L4

(U)B3LYP-D3(BJ) SCF energy: -1900.98781369 a.u.

(U)B3LYP-D3(BJ) enthalpy: -1900.283339 a.u.

(U)B3LYP-D3(BJ) free energy: -1900.390172 a.u.

(U)B3LYP-D3(BJ) SCF energy in solution: -1901.39284305 a.u.

(U)B3LYP-D3(BJ) enthalpy in solution: -1900.688368 a.u.

(U)B3LYP-D3(BJ) free energy in solution: -1900.795201 a.u.

#### Cartesian coordinates

| ATOM | X         | Y         | Z         |
|------|-----------|-----------|-----------|
| Co   | 0.171191  | -0.040226 | -0.202340 |
| P    | -0.652279 | 2.060319  | 0.050210  |
| N    | -0.018770 | -0.254290 | 1.905388  |
| C    | 1.278982  | -0.181353 | 2.588485  |
| C    | -1.028748 | 0.658971  | 2.446447  |
| C    | -0.836968 | 2.092917  | 1.913009  |
| C    | 0.386146  | 3.593487  | -0.253815 |
| C    | -0.268378 | 4.914543  | 0.167132  |
| C    | 0.908514  | 3.650717  | -1.694403 |
| C    | -2.361334 | 2.475009  | -0.603201 |
| C    | -2.430923 | 2.157392  | -2.104520 |
| C    | -3.440937 | 1.692898  | 0.156293  |
| H    | 1.186784  | -0.511069 | 3.636398  |
| H    | -1.012320 | 0.675037  | 3.548574  |
| H    | -2.006390 | 0.274346  | 2.143496  |
| H    | 0.091866  | 2.517110  | 2.312893  |
| H    | -1.652124 | 2.746245  | 2.242784  |

|   |           |           |           |
|---|-----------|-----------|-----------|
| H | -1.103320 | 5.174712  | -0.492264 |
| H | 0.459767  | 5.732860  | 0.107572  |
| H | -0.646626 | 4.878285  | 1.194175  |
| H | 1.347883  | 2.693894  | -1.994237 |
| H | 1.674830  | 4.429278  | -1.791877 |
| H | 0.106518  | 3.891189  | -2.400577 |
| H | -1.676358 | 2.697895  | -2.683795 |
| H | -3.417333 | 2.427122  | -2.501319 |
| H | -2.284109 | 1.085139  | -2.272139 |
| H | -3.254241 | 0.617200  | 0.125552  |
| H | -4.418986 | 1.862980  | -0.308452 |
| H | -3.514374 | 2.001286  | 1.203414  |
| H | -0.338107 | -1.274038 | 1.901714  |
| H | 1.620432  | 0.860282  | 2.608171  |
| H | -0.148982 | -1.831674 | -0.462278 |
| C | 2.295994  | -1.065415 | 1.859774  |
| H | 3.277727  | -1.023843 | 2.345728  |
| H | 1.922753  | -2.095254 | 1.895360  |
| P | 2.368537  | -0.614372 | 0.048154  |
| C | 3.916486  | 0.437801  | -0.081367 |
| C | 2.828695  | -2.264259 | -0.715785 |
| C | 3.797678  | 1.675434  | 0.815191  |
| H | 4.687854  | 2.307578  | 0.709230  |
| H | 2.925788  | 2.275417  | 0.534606  |
| H | 3.700820  | 1.410833  | 1.872409  |
| C | 4.178948  | 0.845132  | -1.536272 |
| H | 5.043150  | 1.518417  | -1.595147 |
| H | 4.386392  | -0.018432 | -2.174292 |
| H | 3.313325  | 1.371376  | -1.955475 |
| C | 2.496121  | -2.319459 | -2.212643 |
| H | 2.622840  | -3.341513 | -2.589788 |

|   |           |           |           |
|---|-----------|-----------|-----------|
| H | 1.458887  | -2.020256 | -2.393888 |
| H | 3.147144  | -1.665798 | -2.803120 |
| C | 4.257324  | -2.735635 | -0.424001 |
| H | 5.000946  | -2.118699 | -0.941270 |
| H | 4.484276  | -2.713676 | 0.647504  |
| H | 4.392024  | -3.767606 | -0.770315 |
| H | 2.133732  | -2.939179 | -0.203008 |
| H | 4.758059  | -0.167899 | 0.277635  |
| H | 1.246641  | 3.416192  | 0.404436  |
| H | -2.534283 | 3.547526  | -0.452915 |
| C | -0.808846 | -2.652610 | 0.111512  |
| O | -0.479221 | -2.795699 | 1.388476  |
| C | -2.251137 | -2.166560 | -0.142635 |
| C | -2.693413 | -1.752010 | -1.406595 |
| C | -3.164734 | -2.192020 | 0.914032  |
| C | -4.026212 | -1.396788 | -1.616818 |
| H | -1.987088 | -1.717599 | -2.234536 |
| C | -4.499371 | -1.831567 | 0.710363  |
| H | -2.793353 | -2.516729 | 1.881013  |
| C | -4.936819 | -1.441072 | -0.556942 |
| H | -4.354860 | -1.082101 | -2.604270 |
| H | -5.201230 | -1.861174 | 1.540444  |
| H | -5.975219 | -1.163581 | -0.717379 |
| C | -0.538946 | -3.916133 | -0.741589 |
| H | -0.720786 | -3.758401 | -1.811390 |
| H | 0.496508  | -4.239740 | -0.599609 |
| H | -1.196451 | -4.717940 | -0.387475 |

**4-L4**

(U)B3LYP-D3(BJ) SCF energy: -1900.98957237 a.u.  
(U)B3LYP-D3(BJ) enthalpy: -1900.284304 a.u.  
(U)B3LYP-D3(BJ) free energy: -1900.390597 a.u.  
(U)B3LYP-D3(BJ) SCF energy in solution: -1901.39039858 a.u.  
(U)B3LYP-D3(BJ) enthalpy in solution: -1900.685130 a.u.  
(U)B3LYP-D3(BJ) free energy in solution: -1900.791423 a.u.

Cartesian coordinates

| ATOM | X         | Y         | Z         |
|------|-----------|-----------|-----------|
| Co   | 0.016230  | -0.254801 | -0.019788 |
| P    | -2.008347 | 0.803021  | 0.229592  |
| N    | 0.202300  | -0.344481 | 2.025492  |
| C    | 1.157342  | 0.587341  | 2.603972  |
| C    | -1.101806 | -0.222927 | 2.655308  |
| C    | -1.934832 | 0.958405  | 2.089724  |
| C    | -2.208259 | 2.589085  | -0.319265 |
| C    | -3.416175 | 3.324621  | 0.271777  |
| C    | -2.147264 | 2.746160  | -1.845221 |
| C    | -3.715729 | 0.049545  | -0.025849 |
| C    | -3.995432 | -0.231130 | -1.508170 |
| C    | -3.878039 | -1.232485 | 0.803835  |
| H    | 1.463347  | 0.273453  | 3.620161  |
| H    | -1.019923 | -0.097363 | 3.750245  |
| H    | -1.654284 | -1.157309 | 2.495926  |
| H    | -1.422146 | 1.901696  | 2.314510  |
| H    | -2.933787 | 1.018245  | 2.540757  |
| H    | -4.357351 | 2.935309  | -0.131966 |
| H    | -3.371984 | 4.392005  | 0.020485  |
| H    | -3.454812 | 3.238756  | 1.362431  |
| H    | -1.358344 | 2.125440  | -2.282116 |
| H    | -1.951362 | 3.791771  | -2.113262 |



|   |           |           |           |
|---|-----------|-----------|-----------|
| H | -3.094816 | 2.465404  | -2.314715 |
| H | -4.038603 | 0.683957  | -2.103627 |
| H | -4.959516 | -0.743701 | -1.619566 |
| H | -3.219548 | -0.873322 | -1.933707 |
| H | -3.096535 | -1.960069 | 0.568727  |
| H | -4.847683 | -1.696307 | 0.582883  |
| H | -3.843066 | -1.034683 | 1.878370  |
| H | 0.671372  | -1.886843 | 2.143111  |
| H | 0.735364  | 1.601510  | 2.723816  |
| H | 2.303781  | -2.228439 | 0.604590  |
| C | 2.413658  | 0.687869  | 1.730732  |
| H | 3.128600  | 1.416544  | 2.129907  |
| H | 2.911849  | -0.289509 | 1.715788  |
| P | 1.927526  | 1.053196  | -0.035621 |
| C | 2.120037  | 2.923417  | -0.176481 |
| C | 3.436233  | 0.389897  | -0.952860 |
| C | 1.486700  | 3.658252  | 1.012184  |
| H | 1.551991  | 4.742321  | 0.856734  |
| H | 0.428054  | 3.402391  | 1.123825  |
| H | 1.985285  | 3.424850  | 1.956351  |
| C | 1.525245  | 3.432729  | -1.495670 |
| H | 1.675129  | 4.515986  | -1.586566 |
| H | 1.977531  | 2.958214  | -2.370158 |
| H | 0.451188  | 3.235996  | -1.534608 |
| C | 3.292132  | 0.501707  | -2.477365 |
| H | 4.029450  | -0.136273 | -2.980020 |
| H | 2.294009  | 0.206063  | -2.817973 |
| H | 3.469264  | 1.527981  | -2.815819 |
| C | 4.790019  | 0.938111  | -0.485816 |
| H | 4.902697  | 1.998946  | -0.735778 |
| H | 4.927609  | 0.827459  | 0.593839  |

|   |           |           |           |
|---|-----------|-----------|-----------|
| H | 5.607377  | 0.400770  | -0.983158 |
| H | 3.405065  | -0.676501 | -0.689192 |
| H | 3.195658  | 3.138373  | -0.166613 |
| H | -1.298600 | 3.043631  | 0.091822  |
| H | -4.446816 | 0.781330  | 0.340931  |
| C | 1.511546  | -2.984425 | 0.770491  |
| O | 0.969528  | -2.875354 | 2.053062  |
| C | 0.463470  | -2.779543 | -0.325456 |
| C | 0.776425  | -2.110207 | -1.525058 |
| C | -0.810626 | -3.357229 | -0.193469 |
| C | -0.158865 | -2.037936 | -2.570629 |
| H | 1.778958  | -1.724781 | -1.674233 |
| C | -1.719053 | -3.325542 | -1.250847 |
| H | -1.055366 | -3.843731 | 0.745238  |
| C | -1.397170 | -2.666502 | -2.442245 |
| H | 0.101434  | -1.518711 | -3.488823 |
| H | -2.688120 | -3.805069 | -1.144033 |
| H | -2.110069 | -2.638325 | -3.261126 |
| C | 2.158025  | -4.365614 | 0.625322  |
| H | 2.617583  | -4.490513 | -0.362031 |
| H | 2.924214  | -4.491261 | 1.396830  |
| H | 1.402205  | -5.146699 | 0.759903  |

#### 5-L4

(U)B3LYP-D3(BJ) SCF energy: -1514.83873649 a.u.

(U)B3LYP-D3(BJ) enthalpy: -1514.306650 a.u.

(U)B3LYP-D3(BJ) free energy: -1514.393907 a.u.

(U)B3LYP-D3(BJ) SCF energy in solution: -1515.11551058 a.u.

(U)B3LYP-D3(BJ) enthalpy in solution: -1514.583424 a.u.

(U)B3LYP-D3(BJ) free energy in solution: -1514.670681 a.u.

Cartesian coordinates

| ATOM | X         | Y         | Z         |
|------|-----------|-----------|-----------|
| Co   | -0.000002 | 0.120329  | -0.000008 |
| P    | -2.214261 | 0.010346  | 0.129440  |
| N    | -0.000001 | -1.794466 | 0.000065  |
| C    | 1.185776  | -2.607514 | -0.154644 |
| C    | -1.185781 | -2.607501 | 0.154824  |
| C    | -2.384272 | -1.772630 | 0.648861  |
| C    | -3.237462 | 0.887132  | 1.439615  |
| C    | -4.747239 | 0.636430  | 1.347706  |
| C    | -2.906865 | 2.383828  | 1.519934  |
| C    | -3.213037 | 0.115970  | -1.452649 |
| C    | -3.262932 | 1.552957  | -1.986647 |
| C    | -2.609027 | -0.829902 | -2.500630 |
| H    | 1.021932  | -3.426325 | -0.882855 |
| H    | -1.021942 | -3.426263 | 0.883090  |
| H    | -1.457248 | -3.116455 | -0.792423 |
| H    | -2.380889 | -1.750787 | 1.744928  |
| H    | -3.340670 | -2.206401 | 0.331053  |
| H    | -5.176838 | 1.111035  | 0.458523  |
| H    | -5.259126 | 1.057564  | 2.221977  |
| H    | -4.982348 | -0.432591 | 1.305959  |
| H    | -1.827278 | 2.543621  | 1.611086  |
| H    | -3.396883 | 2.836089  | 2.391277  |
| H    | -3.249697 | 2.925307  | 0.632261  |
| H    | -3.793380 | 2.229436  | -1.310188 |
| H    | -3.777653 | 1.580586  | -2.955144 |
| H    | -2.250373 | 1.948338  | -2.132750 |
| H    | -1.556938 | -0.586892 | -2.685036 |

|   |           |           |           |
|---|-----------|-----------|-----------|
| H | -3.157365 | -0.740741 | -3.446904 |
| H | -2.653652 | -1.874828 | -2.181693 |
| H | 1.457244  | -3.116406 | 0.792637  |
| C | 2.384268  | -1.772679 | -0.648740 |
| H | 3.340666  | -2.206429 | -0.330901 |
| H | 2.380884  | -1.750913 | -1.744808 |
| P | 2.214258  | 0.010333  | -0.129444 |
| C | 3.213031  | 0.116073  | 1.452639  |
| C | 3.237465  | 0.887029  | -1.439674 |
| C | 4.747237  | 0.636298  | -1.347767 |
| H | 5.259125  | 1.057380  | -2.222063 |
| H | 5.176854  | 1.110935  | -0.458610 |
| H | 4.982323  | -0.432726 | -1.305973 |
| C | 2.906902  | 2.383729  | -1.520057 |
| H | 3.396926  | 2.835941  | -2.391423 |
| H | 1.827318  | 2.543543  | -1.611210 |
| H | 3.249752  | 2.925238  | -0.632409 |
| C | 2.609013  | -0.829712 | 2.500694  |
| H | 3.157348  | -0.740478 | 3.446963  |
| H | 1.556924  | -0.586684 | 2.685078  |
| H | 2.653634  | -1.874664 | 2.181842  |
| C | 3.262934  | 1.553102  | 1.986521  |
| H | 2.250376  | 1.948498  | 2.132598  |
| H | 3.777659  | 1.580808  | 2.955013  |
| H | 3.793379  | 2.229526  | 1.310005  |
| H | 4.234240  | -0.217870 | 1.227454  |
| H | 2.867999  | 0.423973  | -2.365417 |
| H | -2.868016 | 0.424112  | 2.365384  |
| H | -4.234248 | -0.217949 | -1.227436 |

### TS1-L4

(U)B3LYP-D3(BJ) SCF energy: -1900.97997625 a.u.  
(U)B3LYP-D3(BJ) enthalpy: -1900.279077 a.u.  
(U)B3LYP-D3(BJ) free energy: -1900.384954 a.u.  
(U)B3LYP-D3(BJ) SCF energy in solution: -1901.37832805 a.u.  
(U)B3LYP-D3(BJ) enthalpy in solution: -1900.677429 a.u.  
(U)B3LYP-D3(BJ) free energy in solution: -1900.783306 a.u.  
Imaginary frequency: -322.3192 cm<sup>-1</sup>

### Cartesian coordinates

| ATOM | X         | Y         | Z         |
|------|-----------|-----------|-----------|
| Co   | 0.174357  | -0.036249 | -0.371835 |
| P    | -0.105793 | 2.181907  | 0.010225  |
| N    | -0.249411 | -0.270656 | 1.759310  |
| C    | 0.973812  | -0.447738 | 2.554852  |
| C    | -1.123395 | 0.807293  | 2.240782  |
| C    | -0.596456 | 2.190723  | 1.821460  |
| C    | 1.246972  | 3.489023  | -0.001002 |
| C    | 0.775597  | 4.918316  | 0.288898  |
| C    | 2.093381  | 3.412783  | -1.278341 |
| C    | -1.583962 | 3.004376  | -0.804650 |
| C    | -1.358299 | 3.137954  | -2.316360 |
| C    | -2.846236 | 2.178050  | -0.525490 |
| H    | 0.732920  | -0.759910 | 3.585037  |
| H    | -1.240087 | 0.774258  | 3.337124  |
| H    | -2.108858 | 0.634067  | 1.803478  |
| H    | 0.299858  | 2.445062  | 2.399015  |
| H    | -1.344031 | 2.961694  | 2.041589  |
| H    | 0.164823  | 5.310221  | -0.531656 |
| H    | 1.636704  | 5.588582  | 0.403879  |

|   |           |           |           |
|---|-----------|-----------|-----------|
| H | 0.182468  | 4.976333  | 1.208088  |
| H | 2.390323  | 2.381346  | -1.490516 |
| H | 3.000475  | 4.020954  | -1.173991 |
| H | 1.545054  | 3.787285  | -2.148617 |
| H | -0.532353 | 3.814135  | -2.555668 |
| H | -2.260593 | 3.530521  | -2.801382 |
| H | -1.134726 | 2.160640  | -2.761070 |
| H | -2.720999 | 1.137747  | -0.841533 |
| H | -3.698533 | 2.591640  | -1.078374 |
| H | -3.115824 | 2.174294  | 0.534598  |
| H | -0.746084 | -1.172045 | 1.727029  |
| H | 1.484602  | 0.518520  | 2.621182  |
| H | -0.684790 | -1.331841 | -1.004239 |
| C | 1.883698  | -1.480246 | 1.888498  |
| H | 2.814216  | -1.599433 | 2.455368  |
| H | 1.365640  | -2.444981 | 1.874467  |
| P | 2.195220  | -1.010605 | 0.100825  |
| C | 3.967231  | -0.379384 | 0.175893  |
| C | 2.330138  | -2.716468 | -0.672988 |
| C | 4.047297  | 0.856423  | 1.080038  |
| H | 5.073647  | 1.243226  | 1.107242  |
| H | 3.398028  | 1.654578  | 0.706958  |
| H | 3.749922  | 0.633655  | 2.109833  |
| C | 4.500972  | -0.061357 | -1.226036 |
| H | 5.496569  | 0.395849  | -1.163296 |
| H | 4.585803  | -0.958405 | -1.845545 |
| H | 3.841840  | 0.642712  | -1.747099 |
| C | 2.176149  | -2.665134 | -2.198385 |
| H | 2.086673  | -3.680856 | -2.604504 |
| H | 1.276532  | -2.105710 | -2.472728 |
| H | 3.038226  | -2.193960 | -2.682941 |

|   |           |           |           |
|---|-----------|-----------|-----------|
| C | 3.550785  | -3.535393 | -0.240786 |
| H | 4.481138  | -3.118175 | -0.642834 |
| H | 3.646415  | -3.584958 | 0.849626  |
| H | 3.468270  | -4.564245 | -0.612978 |
| H | 1.430129  | -3.196261 | -0.269455 |
| H | 4.584537  | -1.171209 | 0.619316  |
| H | 1.883321  | 3.163928  | 0.833531  |
| H | -1.711631 | 4.003677  | -0.369418 |
| C | -1.579404 | -2.636865 | -0.127076 |
| O | -1.031910 | -2.875727 | 0.975917  |
| C | -2.883472 | -1.864132 | -0.130678 |
| C | -3.527126 | -1.444899 | -1.303686 |
| C | -3.500105 | -1.607169 | 1.099814  |
| C | -4.746859 | -0.776048 | -1.245480 |
| H | -3.053364 | -1.613198 | -2.265153 |
| C | -4.716007 | -0.923813 | 1.162426  |
| H | -3.014679 | -1.967759 | 2.000617  |
| C | -5.344841 | -0.505520 | -0.010241 |
| H | -5.228145 | -0.452332 | -2.164552 |
| H | -5.178108 | -0.730724 | 2.127269  |
| H | -6.293566 | 0.022194  | 0.033834  |
| C | -1.359181 | -3.613899 | -1.275936 |
| H | -1.608902 | -3.199269 | -2.253532 |
| H | -0.319037 | -3.941290 | -1.284394 |
| H | -1.995860 | -4.492218 | -1.095463 |

#### TS2-L4

(U)B3LYP-D3(BJ) SCF energy: -1900.98859727 a.u.

(U)B3LYP-D3(BJ) enthalpy: -1900.287624 a.u.

(U)B3LYP-D3(BJ) free energy: -1900.392909 a.u.  
(U)B3LYP-D3(BJ) SCF energy in solution: -1901.38408063 a.u.  
(U)B3LYP-D3(BJ) enthalpy in solution: -1900.683107 a.u.  
(U)B3LYP-D3(BJ) free energy in solution: -1900.788392 a.u.  
Imaginary frequency: -1075.4970 cm-1

Cartesian coordinates

| ATOM | X         | Y         | Z         |
|------|-----------|-----------|-----------|
| Co   | -0.014887 | -0.202675 | -0.075248 |
| P    | -1.530949 | 1.488871  | 0.282088  |
| N    | 0.092780  | -0.402799 | 2.000284  |
| C    | 1.246756  | 0.263102  | 2.587892  |
| C    | -1.160183 | -0.003176 | 2.613813  |
| C    | -1.609119 | 1.404702  | 2.152254  |
| C    | -1.006628 | 3.271616  | 0.000867  |
| C    | -2.036483 | 4.330849  | 0.407861  |
| C    | -0.490133 | 3.490871  | -1.426560 |
| C    | -3.355975 | 1.462783  | -0.164861 |
| C    | -3.559458 | 1.566162  | -1.681282 |
| C    | -4.016121 | 0.194771  | 0.393032  |
| H    | 1.370826  | -0.015245 | 3.650849  |
| H    | -1.105510 | -0.016684 | 3.717461  |
| H    | -1.929894 | -0.731189 | 2.327961  |
| H    | -0.918655 | 2.159677  | 2.545072  |
| H    | -2.606396 | 1.657914  | 2.531365  |
| H    | -2.903327 | 4.324866  | -0.261857 |
| H    | -1.591932 | 5.332734  | 0.356597  |
| H    | -2.398121 | 4.177659  | 1.430404  |
| H    | 0.219302  | 2.706838  | -1.707680 |
| H    | 0.013229  | 4.462335  | -1.509465 |
| H    | -1.306023 | 3.480035  | -2.156631 |



|   |           |           |           |
|---|-----------|-----------|-----------|
| H | -3.211397 | 2.524209  | -2.078797 |
| H | -4.624501 | 1.472331  | -1.928827 |
| H | -3.021004 | 0.767306  | -2.200423 |
| H | -3.518106 | -0.705663 | 0.025451  |
| H | -5.066636 | 0.150383  | 0.078710  |
| H | -3.997441 | 0.169589  | 1.486735  |
| H | 0.357264  | -1.660417 | 1.756414  |
| H | 1.132391  | 1.360904  | 2.570545  |
| H | 0.143874  | -4.438514 | 0.465463  |
| C | 2.518744  | -0.114522 | 1.821866  |
| H | 3.393825  | 0.411571  | 2.219890  |
| H | 2.688049  | -1.190398 | 1.928274  |
| P | 2.290399  | 0.210321  | -0.006758 |
| C | 3.344279  | 1.745829  | -0.271754 |
| C | 3.309369  | -1.200482 | -0.721925 |
| C | 2.840046  | 2.905975  | 0.594997  |
| H | 3.492952  | 3.778794  | 0.470510  |
| H | 1.829954  | 3.202332  | 0.299144  |
| H | 2.819191  | 2.653031  | 1.659071  |
| C | 3.390494  | 2.161993  | -1.747106 |
| H | 3.934678  | 3.108344  | -1.857832 |
| H | 3.890334  | 1.417613  | -2.371257 |
| H | 2.380561  | 2.309861  | -2.145470 |
| C | 3.202991  | -1.320104 | -2.250115 |
| H | 3.516011  | -2.320416 | -2.573156 |
| H | 2.183369  | -1.153599 | -2.611071 |
| H | 3.852686  | -0.599004 | -2.756052 |
| C | 4.775255  | -1.225622 | -0.273917 |
| H | 5.340457  | -0.389855 | -0.702822 |
| H | 4.873274  | -1.179885 | 0.815034  |
| H | 5.257765  | -2.151463 | -0.611404 |

|   |           |           |           |
|---|-----------|-----------|-----------|
| H | 2.796151  | -2.060740 | -0.271054 |
| H | 4.360096  | 1.491628  | 0.057438  |
| H | -0.148535 | 3.357533  | 0.679576  |
| H | -3.823358 | 2.330996  | 0.316637  |
| C | -0.285902 | -3.486344 | 0.831183  |
| O | 0.764987  | -2.674242 | 1.256349  |
| C | -1.010679 | -2.871656 | -0.378588 |
| C | -2.379265 | -3.001126 | -0.636050 |
| C | -0.226209 | -2.171320 | -1.323392 |
| C | -2.952011 | -2.456521 | -1.792309 |
| H | -3.011984 | -3.538515 | 0.062701  |
| C | -0.802419 | -1.603299 | -2.469600 |
| H | 0.849990  | -2.194036 | -1.202846 |
| C | -2.173089 | -1.746589 | -2.704708 |
| H | -4.017846 | -2.575508 | -1.968339 |
| H | -0.173296 | -1.087879 | -3.190266 |
| H | -2.623308 | -1.320983 | -3.596780 |
| C | -1.240346 | -3.844777 | 1.980901  |
| H | -1.965186 | -4.619829 | 1.703538  |
| H | -0.643952 | -4.217952 | 2.818232  |
| H | -1.792476 | -2.961519 | 2.322919  |

#### **TS3-L4**

(U)B3LYP-D3(BJ) SCF energy: -1515.99251312 a.u.

(U)B3LYP-D3(BJ) enthalpy: -1515.446989 a.u.

(U)B3LYP-D3(BJ) free energy: -1515.533041 a.u.

(U)B3LYP-D3(BJ) SCF energy in solution: -1516.27757877 a.u.

(U)B3LYP-D3(BJ) enthalpy in solution: -1515.732055 a.u.

(U)B3LYP-D3(BJ) free energy in solution: -1515.818107 a.u.

Imaginary frequency: -828.8597 cm-1

Cartesian coordinates

| ATOM | X         | Y         | Z         |
|------|-----------|-----------|-----------|
| Co   | -0.014457 | -0.799010 | 0.680197  |
| P    | 1.982750  | 0.045580  | -0.011103 |
| N    | -0.004447 | -2.054956 | -1.058508 |
| C    | -0.837947 | -1.506841 | -2.101473 |
| C    | 1.362893  | -2.297611 | -1.439810 |
| C    | 2.227842  | -1.005446 | -1.540089 |
| C    | 2.206062  | 1.781955  | -0.690705 |
| C    | 3.626462  | 2.095061  | -1.175844 |
| C    | 1.674925  | 2.856283  | 0.267067  |
| C    | 3.525249  | -0.308548 | 0.996507  |
| C    | 3.582627  | 0.568452  | 2.253572  |
| C    | 3.557125  | -1.795560 | 1.378136  |
| H    | -0.966821 | -2.213243 | -2.945111 |
| H    | 1.438353  | -2.833352 | -2.404725 |
| H    | 1.814983  | -2.957849 | -0.686963 |
| H    | 1.896082  | -0.405327 | -2.395555 |
| H    | 3.287544  | -1.240501 | -1.702717 |
| H    | 4.331914  | 2.146697  | -0.339302 |
| H    | 3.649896  | 3.067551  | -1.683205 |
| H    | 3.991927  | 1.340728  | -1.880558 |
| H    | 0.670820  | 2.605797  | 0.621838  |
| H    | 1.630724  | 3.828504  | -0.239330 |
| H    | 2.318735  | 2.971787  | 1.144463  |
| H    | 3.698773  | 1.628928  | 2.013673  |
| H    | 4.432909  | 0.275064  | 2.881533  |
| H    | 2.669457  | 0.455860  | 2.850461  |
| H    | 2.660530  | -2.076705 | 1.944382  |

|   |           |           |           |
|---|-----------|-----------|-----------|
| H | 4.431281  | -2.003249 | 2.007380  |
| H | 3.614937  | -2.445512 | 0.500548  |
| H | -0.400311 | -0.587347 | -2.544607 |
| C | -2.223847 | -1.150025 | -1.545604 |
| H | -2.853965 | -0.681756 | -2.310944 |
| H | -2.724395 | -2.069436 | -1.219433 |
| P | -2.043931 | -0.061855 | -0.029351 |
| C | -2.558257 | 1.625915  | -0.670850 |
| C | -3.490755 | -0.646983 | 1.017727  |
| C | -1.601535 | 2.077793  | -1.781087 |
| H | -1.900026 | 3.063309  | -2.159673 |
| H | -0.578588 | 2.159090  | -1.402042 |
| H | -1.590603 | 1.382275  | -2.625583 |
| C | -2.603197 | 2.661754  | 0.459123  |
| H | -2.794353 | 3.662925  | 0.053045  |
| H | -3.389697 | 2.443405  | 1.186872  |
| H | -1.648673 | 2.694805  | 0.997591  |
| C | -3.340784 | -0.228152 | 2.486712  |
| H | -4.113574 | -0.709055 | 3.099467  |
| H | -2.361769 | -0.524641 | 2.877257  |
| H | -3.443592 | 0.854041  | 2.617900  |
| C | -4.875899 | -0.305594 | 0.458085  |
| H | -5.074808 | 0.770894  | 0.507957  |
| H | -4.984106 | -0.620446 | -0.585633 |
| H | -5.657791 | -0.808191 | 1.041000  |
| H | -3.359567 | -1.736862 | 0.981315  |
| H | -3.562556 | 1.523744  | -1.101861 |
| H | 1.543586  | 1.765139  | -1.566531 |
| H | 4.398082  | -0.092101 | 0.367438  |
| H | -0.476962 | -2.502940 | 0.291365  |
| H | -0.644982 | -2.464659 | 1.230534  |

## 1-L5

(U)B3LYP-D3(BJ) SCF energy: -1968.51139431 a.u.  
(U)B3LYP-D3(BJ) enthalpy: -1967.972655 a.u.  
(U)B3LYP-D3(BJ) free energy: -1968.067991 a.u.  
(U)B3LYP-D3(BJ) SCF energy in solution: -1968.92101171 a.u.  
(U)B3LYP-D3(BJ) enthalpy in solution: -1968.382272 a.u.  
(U)B3LYP-D3(BJ) free energy in solution: -1968.477608 a.u.

### Cartesian coordinates

| ATOM | X         | Y         | Z         |
|------|-----------|-----------|-----------|
| Co   | -0.018869 | -1.757267 | -0.100223 |
| P    | -1.791650 | -0.352503 | 0.167455  |
| N    | -0.131612 | -1.937808 | 2.131704  |
| C    | 0.799214  | -1.056687 | 2.861293  |
| C    | -1.541046 | -1.788830 | 2.543989  |
| C    | -2.133553 | -0.478958 | 2.008765  |
| H    | 0.985648  | -1.427080 | 3.882095  |
| H    | -1.651278 | -1.830075 | 3.640009  |
| H    | -2.088349 | -2.636323 | 2.120432  |
| H    | -1.669182 | 0.382860  | 2.498840  |
| H    | -3.206066 | -0.439348 | 2.224696  |
| H    | 0.153215  | -2.908027 | 2.241092  |
| H    | 0.310970  | -0.085181 | 2.965579  |
| H    | -0.025443 | -3.279427 | -0.707069 |
| C    | 2.119548  | -0.884410 | 2.107547  |
| H    | 2.744912  | -0.126186 | 2.591796  |
| H    | 2.680921  | -1.825706 | 2.112325  |
| P    | 1.819803  | -0.490824 | 0.294062  |

|   |           |           |           |
|---|-----------|-----------|-----------|
| C | 1.934905  | 1.345203  | 0.205530  |
| C | 1.345298  | 2.154992  | 1.187795  |
| C | 2.487723  | 1.965720  | -0.925798 |
| C | 1.326517  | 3.541940  | 1.056615  |
| H | 0.882141  | 1.703930  | 2.059291  |
| C | 2.469963  | 3.353929  | -1.057597 |
| H | 2.946350  | 1.359062  | -1.700725 |
| C | 1.891950  | 4.147642  | -0.066077 |
| H | 0.857877  | 4.148750  | 1.825921  |
| H | 2.910425  | 3.815262  | -1.937564 |
| H | 1.872722  | 5.228546  | -0.171550 |
| C | 3.433239  | -1.007585 | -0.427400 |
| C | 3.444082  | -2.117494 | -1.281966 |
| C | 4.643906  | -0.370174 | -0.113879 |
| C | 4.648255  | -2.582979 | -1.815822 |
| H | 2.504600  | -2.615224 | -1.511257 |
| C | 5.844031  | -0.835457 | -0.647754 |
| H | 4.643580  | 0.499602  | 0.537244  |
| C | 5.847160  | -1.943390 | -1.500744 |
| H | 4.646771  | -3.443800 | -2.478807 |
| H | 6.776821  | -0.335447 | -0.400819 |
| H | 6.783508  | -2.304170 | -1.917827 |
| C | -3.402004 | -0.918416 | -0.537672 |
| C | -3.464840 | -2.231995 | -1.023346 |
| C | -4.553954 | -0.119283 | -0.571038 |
| C | -4.667032 | -2.743581 | -1.516570 |
| H | -2.562530 | -2.840637 | -1.020934 |
| C | -5.751045 | -0.629963 | -1.070775 |
| H | -4.511904 | 0.907594  | -0.220103 |
| C | -5.810747 | -1.944919 | -1.540618 |
| H | -4.705056 | -3.763058 | -1.890888 |

|   |           |           |           |
|---|-----------|-----------|-----------|
| H | -6.637175 | -0.001206 | -1.098038 |
| H | -6.744552 | -2.340451 | -1.931091 |
| C | -1.816473 | 1.457812  | -0.136230 |
| C | -2.458331 | 2.387218  | 0.695061  |
| C | -1.120346 | 1.925404  | -1.260991 |
| C | -2.409473 | 3.751760  | 0.404624  |
| H | -3.002575 | 2.050634  | 1.572629  |
| C | -1.080116 | 3.285532  | -1.557052 |
| H | -0.589635 | 1.215512  | -1.888929 |
| C | -1.723638 | 4.202352  | -0.723633 |
| H | -2.910215 | 4.461195  | 1.058206  |
| H | -0.525507 | 3.632174  | -2.423483 |
| H | -1.681717 | 5.264675  | -0.947265 |

## 2-L5

(U)B3LYP-D3(BJ) SCF energy: -2353.45807203 a.u.

(U)B3LYP-D3(BJ) enthalpy: -2352.769610 a.u.

(U)B3LYP-D3(BJ) free energy: -2352.888008 a.u.

(U)B3LYP-D3(BJ) SCF energy in solution: -2353.97877855 a.u.

(U)B3LYP-D3(BJ) enthalpy in solution: -2353.290317 a.u.

(U)B3LYP-D3(BJ) free energy in solution: -2353.408715 a.u.

## Cartesian coordinates

| ATOM | X         | Y         | Z         |
|------|-----------|-----------|-----------|
| Co   | 0.362243  | -0.506930 | 0.409515  |
| P    | 0.552116  | 1.715380  | -0.020561 |
| N    | 0.825008  | -0.691701 | -1.792942 |
| C    | -0.369569 | -0.881156 | -2.639446 |
| C    | 1.656351  | 0.447692  | -2.222825 |

|   |           |           |           |
|---|-----------|-----------|-----------|
| C | 1.005179  | 1.782111  | -1.838438 |
| H | -0.095091 | -1.336145 | -3.604088 |
| H | 1.847042  | 0.423221  | -3.308762 |
| H | 2.621706  | 0.351622  | -1.718053 |
| H | 0.084821  | 1.946812  | -2.408157 |
| H | 1.684398  | 2.611266  | -2.061696 |
| H | 1.370021  | -1.553835 | -1.834266 |
| H | -0.783627 | 0.104830  | -2.862441 |
| H | 1.156868  | -1.434374 | 1.505594  |
| C | -1.423154 | -1.736567 | -1.936603 |
| H | -2.342909 | -1.790002 | -2.529733 |
| H | -1.039874 | -2.754994 | -1.811453 |
| P | -1.737338 | -1.103852 | -0.200468 |
| C | 2.336257  | -3.456508 | -0.453612 |
| O | 1.703679  | -3.476020 | -1.508721 |
| C | 3.524211  | -2.560592 | -0.315185 |
| C | 4.056462  | -2.215485 | 0.934970  |
| C | 4.102609  | -2.029583 | -1.477024 |
| C | 5.138181  | -1.341843 | 1.019009  |
| H | 3.598224  | -2.593718 | 1.840410  |
| C | 5.184845  | -1.156605 | -1.393010 |
| H | 3.690892  | -2.316328 | -2.439412 |
| C | 5.700874  | -0.807006 | -0.142742 |
| H | 5.533835  | -1.067165 | 1.992499  |
| H | 5.627153  | -0.750586 | -2.298277 |
| H | 6.539270  | -0.119730 | -0.073831 |
| C | 1.929283  | -4.321965 | 0.712054  |
| H | 1.546577  | -3.659999 | 1.497777  |
| H | 1.134577  | -4.999905 | 0.396229  |
| H | 2.778291  | -4.887508 | 1.111739  |
| C | 2.027804  | 2.548363  | 0.710775  |



|   |           |           |           |
|---|-----------|-----------|-----------|
| C | 3.087362  | 1.717848  | 1.106099  |
| C | 2.166367  | 3.937635  | 0.831679  |
| C | 4.274267  | 2.270560  | 1.588072  |
| H | 2.969105  | 0.638335  | 1.050914  |
| C | 3.348163  | 4.487004  | 1.329667  |
| H | 1.346937  | 4.590275  | 0.545775  |
| C | 4.406892  | 3.655284  | 1.702488  |
| H | 5.089042  | 1.616046  | 1.884469  |
| H | 3.442675  | 5.565349  | 1.427632  |
| H | 5.326898  | 4.085985  | 2.088606  |
| C | -0.793299 | 2.949975  | 0.129950  |
| C | -0.958985 | 4.036224  | -0.741699 |
| C | -1.734986 | 2.749835  | 1.150433  |
| C | -2.041265 | 4.904971  | -0.593055 |
| H | -0.243264 | 4.207129  | -1.540692 |
| C | -2.810039 | 3.621941  | 1.304625  |
| H | -1.631733 | 1.888468  | 1.803864  |
| C | -2.966324 | 4.700095  | 0.431601  |
| H | -2.160815 | 5.741420  | -1.276610 |
| H | -3.540106 | 3.444205  | 2.088058  |
| H | -3.812418 | 5.372518  | 0.542932  |
| C | -3.195153 | 0.010035  | -0.357138 |
| C | -3.275466 | 0.946196  | -1.399736 |
| C | -4.169363 | 0.054220  | 0.652703  |
| C | -4.304704 | 1.883873  | -1.444110 |
| H | -2.520747 | 0.957270  | -2.178883 |
| C | -5.199398 | 0.993894  | 0.609894  |
| H | -4.126873 | -0.658242 | 1.470819  |
| C | -5.272775 | 1.910986  | -0.439151 |
| H | -4.342351 | 2.603103  | -2.257271 |
| H | -5.946974 | 1.006955  | 1.398774  |

|   |           |           |           |
|---|-----------|-----------|-----------|
| H | -6.071608 | 2.646482  | -0.469357 |
| C | -2.480137 | -2.603805 | 0.568238  |
| C | -3.678836 | -3.172972 | 0.111345  |
| C | -1.779624 | -3.226679 | 1.608785  |
| C | -4.165355 | -4.346783 | 0.683790  |
| H | -4.236739 | -2.689068 | -0.685758 |
| C | -2.267849 | -4.403735 | 2.181363  |
| H | -0.848252 | -2.780860 | 1.949791  |
| C | -3.458834 | -4.964777 | 1.720144  |
| H | -5.094250 | -4.780950 | 0.323524  |
| H | -1.717993 | -4.879736 | 2.989007  |
| H | -3.839378 | -5.880002 | 2.165745  |

### 3-L5

(U)B3LYP-D3(BJ) SCF energy: -2353.47116309 a.u.

(U)B3LYP-D3(BJ) enthalpy: -2352.779874 a.u.

(U)B3LYP-D3(BJ) free energy: -2352.893319 a.u.

(U)B3LYP-D3(BJ) SCF energy in solution: -2353.98755518 a.u.

(U)B3LYP-D3(BJ) enthalpy in solution: -2353.296266 a.u.

(U)B3LYP-D3(BJ) free energy in solution: -2353.409711 a.u.

### Cartesian coordinates

| ATOM | X         | Y         | Z        |
|------|-----------|-----------|----------|
| Co   | 0.081367  | 0.924256  | 0.337182 |
| P    | 1.747208  | -0.605136 | 0.404468 |
| N    | 0.084528  | 1.008581  | 2.364595 |
| C    | -0.999843 | 0.327733  | 3.053839 |
| C    | 1.390842  | 0.625499  | 2.868737 |
| C    | 1.900432  | -0.714587 | 2.262635 |

|   |           |           |           |
|---|-----------|-----------|-----------|
| H | -1.184296 | 0.761472  | 4.054177  |
| H | 1.403473  | 0.533891  | 3.969267  |
| H | 2.107527  | 1.420592  | 2.618187  |
| H | 1.247766  | -1.532616 | 2.586294  |
| H | 2.918577  | -0.964587 | 2.584295  |
| H | -0.041347 | 2.685730  | 2.259142  |
| H | -0.785653 | -0.741264 | 3.237813  |
| H | -1.589959 | 3.211988  | 0.630243  |
| C | -2.303791 | 0.423254  | 2.246045  |
| H | -3.106448 | -0.168418 | 2.699257  |
| H | -2.622106 | 1.472332  | 2.208660  |
| P | -1.960989 | -0.067535 | 0.477156  |
| C | -0.604743 | 3.714669  | 0.690968  |
| O | -0.089354 | 3.670588  | 1.993474  |
| C | 0.314980  | 3.036965  | -0.335866 |
| C | -0.200177 | 2.524910  | -1.550109 |
| C | 1.716905  | 3.074639  | -0.164536 |
| C | 0.668843  | 2.078851  | -2.555291 |
| H | -1.273913 | 2.524761  | -1.713706 |
| C | 2.572363  | 2.674819  | -1.193112 |
| H | 2.101362  | 3.460462  | 0.773784  |
| C | 2.052462  | 2.176691  | -2.389628 |
| H | 0.256906  | 1.678111  | -3.478144 |
| H | 3.646755  | 2.722514  | -1.050621 |
| H | 2.723280  | 1.840257  | -3.173685 |
| C | -0.809908 | 5.183266  | 0.308432  |
| H | -1.237369 | 5.274804  | -0.696109 |
| H | -1.482059 | 5.658790  | 1.029457  |
| H | 0.151207  | 5.707779  | 0.330656  |
| C | 3.468923  | -0.283114 | -0.155865 |
| C | 4.356883  | 0.470894  | 0.624363  |

|   |           |           |           |
|---|-----------|-----------|-----------|
| C | 3.865270  | -0.664970 | -1.446173 |
| C | 5.610125  | 0.832659  | 0.128561  |
| H | 4.067853  | 0.794863  | 1.618903  |
| C | 5.115300  | -0.300729 | -1.943418 |
| H | 3.189571  | -1.250445 | -2.062979 |
| C | 5.992496  | 0.452298  | -1.158873 |
| H | 6.286626  | 1.414337  | 0.749021  |
| H | 5.406898  | -0.607220 | -2.944466 |
| H | 6.966634  | 0.736381  | -1.546623 |
| C | 1.478046  | -2.321434 | -0.180972 |
| C | 2.106070  | -3.430409 | 0.402463  |
| C | 0.590329  | -2.521928 | -1.246367 |
| C | 1.838160  | -4.716968 | -0.063599 |
| H | 2.804087  | -3.286559 | 1.222510  |
| C | 0.331091  | -3.807010 | -1.721471 |
| H | 0.083483  | -1.662372 | -1.675413 |
| C | 0.950360  | -4.906023 | -1.126123 |
| H | 2.323112  | -5.572407 | 0.399018  |
| H | -0.373895 | -3.951513 | -2.534615 |
| H | 0.737733  | -5.909723 | -1.483528 |
| C | -2.258242 | -1.884311 | 0.437992  |
| C | -1.470084 | -2.716449 | 1.250199  |
| C | -3.180810 | -2.479603 | -0.433233 |
| C | -1.610020 | -4.100391 | 1.204723  |
| H | -0.725844 | -2.281362 | 1.905117  |
| C | -3.310394 | -3.868744 | -0.488661 |
| H | -3.802253 | -1.860026 | -1.070651 |
| C | -2.528947 | -4.683286 | 0.330322  |
| H | -0.981132 | -4.723633 | 1.833236  |
| H | -4.030280 | -4.312175 | -1.171552 |
| H | -2.629133 | -5.763978 | 0.283340  |

|   |           |          |           |
|---|-----------|----------|-----------|
| C | -3.387420 | 0.589274 | -0.471082 |
| C | -4.591379 | 0.997004 | 0.119164  |
| C | -3.246477 | 0.702485 | -1.864229 |
| C | -5.624825 | 1.515250 | -0.663191 |
| H | -4.727129 | 0.909164 | 1.192120  |
| C | -4.283729 | 1.205584 | -2.648405 |
| H | -2.313305 | 0.394353 | -2.329167 |
| C | -5.474582 | 1.619330 | -2.046841 |
| H | -6.550195 | 1.833402 | -0.191074 |
| H | -4.160368 | 1.283615 | -3.725050 |
| H | -6.280285 | 2.022382 | -2.653735 |

#### 4-L5

(U)B3LYP-D3(BJ) SCF energy: -2353.47116293 a.u.

(U)B3LYP-D3(BJ) enthalpy: -2352.779874 a.u.

(U)B3LYP-D3(BJ) free energy: -2352.893321 a.u.

(U)B3LYP-D3(BJ) SCF energy in solution: -2353.98755944 a.u.

(U)B3LYP-D3(BJ) enthalpy in solution: -2353.296271 a.u.

(U)B3LYP-D3(BJ) free energy in solution: -2353.409718 a.u.

#### Cartesian coordinates

| ATOM | X         | Y         | Z        |
|------|-----------|-----------|----------|
| Co   | 0.081124  | 0.924587  | 0.337130 |
| P    | 1.747523  | -0.604505 | 0.404567 |
| N    | 0.084121  | 1.008887  | 2.364555 |
| C    | -0.999873 | 0.327346  | 3.053714 |
| C    | 1.390642  | 0.626479  | 2.868625 |
| C    | 1.900652  | -0.713593 | 2.262726 |
| H    | -1.184531 | 0.760869  | 4.054104 |

|   |           |           |           |
|---|-----------|-----------|-----------|
| H | 1.403475  | 0.535076  | 3.969174  |
| H | 2.106990  | 1.421780  | 2.617775  |
| H | 1.248188  | -1.531728 | 2.586542  |
| H | 2.918830  | -0.963276 | 2.584527  |
| H | -0.042989 | 2.686001  | 2.258947  |
| H | -0.785108 | -0.741548 | 3.237541  |
| H | -1.591398 | 3.211343  | 0.629642  |
| C | -2.303851 | 0.422377  | 2.245905  |
| H | -3.106294 | -0.169660 | 2.699014  |
| H | -2.622534 | 1.471343  | 2.208645  |
| P | -1.960893 | -0.068145 | 0.476961  |
| C | -0.606481 | 3.714561  | 0.690583  |
| O | -0.091344 | 3.670821  | 1.993233  |
| C | 0.313966  | 3.037261  | -0.335876 |
| C | -0.200369 | 2.525035  | -1.550384 |
| C | 1.715837  | 3.075597  | -0.163925 |
| C | 0.669354  | 2.079577  | -2.555261 |
| H | -1.274026 | 2.524377  | -1.714530 |
| C | 2.571941  | 2.676292  | -1.192126 |
| H | 2.099638  | 3.461569  | 0.774599  |
| C | 2.052820  | 2.178096  | -2.388987 |
| H | 0.257995  | 1.678763  | -3.478342 |
| H | 3.646252  | 2.724453  | -1.049129 |
| H | 2.724160  | 1.842132  | -3.172796 |
| C | -0.812301 | 5.183028  | 0.307903  |
| H | -1.239432 | 5.274293  | -0.696800 |
| H | -1.484979 | 5.658209  | 1.028663  |
| H | 0.148527  | 5.708046  | 0.330461  |
| C | 3.469268  | -0.282628 | -0.155775 |
| C | 4.357379  | 0.471351  | 0.624289  |
| C | 3.865508  | -0.664681 | -1.446077 |

|   |           |           |           |
|---|-----------|-----------|-----------|
| C | 5.610662  | 0.832844  | 0.128360  |
| H | 4.068460  | 0.795497  | 1.618803  |
| C | 5.115565  | -0.300728 | -1.943430 |
| H | 3.189692  | -1.250125 | -2.062779 |
| C | 5.992926  | 0.452250  | -1.159026 |
| H | 6.287306  | 1.414469  | 0.748705  |
| H | 5.407048  | -0.607392 | -2.944459 |
| H | 6.967096  | 0.736117  | -1.546851 |
| C | 1.478435  | -2.320842 | -0.180755 |
| C | 2.106409  | -3.429752 | 0.402868  |
| C | 0.591015  | -2.521427 | -1.246374 |
| C | 1.838737  | -4.716340 | -0.063235 |
| H | 2.804202  | -3.285805 | 1.223090  |
| C | 0.332027  | -3.806546 | -1.721530 |
| H | 0.084204  | -1.661924 | -1.675566 |
| C | 0.951239  | -4.905488 | -1.126001 |
| H | 2.323632  | -5.571736 | 0.399520  |
| H | -0.372724 | -3.951128 | -2.534863 |
| H | 0.738804  | -5.909212 | -1.483449 |
| C | -2.257591 | -1.885033 | 0.437812  |
| C | -1.469375 | -2.716966 | 1.250170  |
| C | -3.179863 | -2.480577 | -0.433557 |
| C | -1.608993 | -4.100943 | 1.204722  |
| H | -0.725323 | -2.281708 | 1.905188  |
| C | -3.309133 | -3.869748 | -0.488951 |
| H | -3.801352 | -1.861172 | -1.071096 |
| C | -2.527649 | -4.684083 | 0.330201  |
| H | -0.980066 | -4.724013 | 1.833366  |
| H | -4.028807 | -4.313362 | -1.171946 |
| H | -2.627593 | -5.764800 | 0.283256  |
| C | -3.387613 | 0.588204  | -0.471177 |

|   |           |          |           |
|---|-----------|----------|-----------|
| C | -4.591618 | 0.995588 | 0.119222  |
| C | -3.246847 | 0.701581 | -1.864317 |
| C | -5.625268 | 1.513659 | -0.662983 |
| H | -4.727275 | 0.907595 | 1.192175  |
| C | -4.284294 | 1.204506 | -2.648347 |
| H | -2.313670 | 0.393675 | -2.329396 |
| C | -5.475187 | 1.617922 | -2.046635 |
| H | -6.550665 | 1.831529 | -0.190728 |
| H | -4.161049 | 1.282653 | -3.724997 |
| H | -6.281029 | 2.020856 | -2.653421 |

### 5-L5

(U)B3LYP-D3(BJ) SCF energy: -1967.30686171 a.u.

(U)B3LYP-D3(BJ) enthalpy: -1966.787850 a.u.

(U)B3LYP-D3(BJ) free energy: -1966.884168 a.u.

(U)B3LYP-D3(BJ) SCF energy in solution: -1967.70233550 a.u.

(U)B3LYP-D3(BJ) enthalpy in solution: -1967.183324 a.u.

(U)B3LYP-D3(BJ) free energy in solution: -1967.279642 a.u.

### Cartesian coordinates

| ATOM | X         | Y         | Z         |
|------|-----------|-----------|-----------|
| Co   | 0.000030  | 0.000027  | -0.018032 |
| P    | 2.204058  | -0.223001 | 0.144795  |
| N    | -0.000078 | -0.000304 | 1.908966  |
| C    | -1.163571 | 0.306848  | 2.713862  |
| C    | 1.163413  | -0.307277 | 2.713929  |
| C    | 2.266107  | -0.952314 | 1.858165  |
| H    | -0.918178 | 1.002544  | 3.538740  |
| H    | 0.918114  | -1.003105 | 3.538726  |



|   |           |           |           |
|---|-----------|-----------|-----------|
| H | 1.576216  | 0.597746  | 3.204048  |
| H | 2.062834  | -2.021001 | 1.723513  |
| H | 3.253087  | -0.840617 | 2.320603  |
| H | -1.576615 | -0.598131 | 3.203860  |
| C | -2.266077 | 0.952190  | 1.858094  |
| H | -3.253094 | 0.840720  | 2.320514  |
| H | -2.062535 | 2.020831  | 1.723481  |
| P | -2.204130 | 0.222992  | 0.144675  |
| C | 3.117162  | 1.365148  | 0.324919  |
| C | 2.472666  | 2.398497  | 1.027732  |
| C | 4.394946  | 1.592639  | -0.201518 |
| C | 3.107103  | 3.625253  | 1.213810  |
| H | 1.470822  | 2.227964  | 1.413592  |
| C | 5.022202  | 2.827250  | -0.021443 |
| H | 4.901779  | 0.808981  | -0.754742 |
| C | 4.383428  | 3.843685  | 0.689083  |
| H | 2.601526  | 4.414756  | 1.763422  |
| H | 6.012148  | 2.992536  | -0.438261 |
| H | 4.874364  | 4.802799  | 0.829298  |
| C | 3.334954  | -1.285513 | -0.830418 |
| C | 4.517438  | -1.823374 | -0.298750 |
| C | 2.997513  | -1.573345 | -2.159786 |
| C | 5.342575  | -2.629918 | -1.081667 |
| H | 4.797381  | -1.606961 | 0.727849  |
| C | 3.825163  | -2.376018 | -2.946062 |
| H | 2.076390  | -1.168448 | -2.571303 |
| C | 4.998133  | -2.906144 | -2.407158 |
| H | 6.254330  | -3.042636 | -0.658674 |
| H | 3.551317  | -2.591800 | -3.974980 |
| H | 5.641354  | -3.535525 | -3.015799 |
| C | -3.335091 | 1.285576  | -0.830372 |

|   |           |           |           |
|---|-----------|-----------|-----------|
| C | -4.517772 | 1.823009  | -0.298701 |
| C | -2.997446 | 1.574023  | -2.159553 |
| C | -5.342882 | 2.629766  | -1.081426 |
| H | -4.797878 | 1.606124  | 0.727755  |
| C | -3.825054 | 2.376935  | -2.945628 |
| H | -2.076192 | 1.169430  | -2.571073 |
| C | -4.998211 | 2.906643  | -2.406721 |
| H | -6.254785 | 3.042153  | -0.658430 |
| H | -3.551035 | 2.593224  | -3.974393 |
| H | -5.641399 | 3.536205  | -3.015210 |
| C | -3.117088 | -1.365238 | 0.324713  |
| C | -2.472409 | -2.398671 | 1.027222  |
| C | -4.394993 | -1.592680 | -0.201472 |
| C | -3.106762 | -3.625492 | 1.213206  |
| H | -1.470514 | -2.228141 | 1.412951  |
| C | -5.022160 | -2.827338 | -0.021485 |
| H | -4.901963 | -0.808945 | -0.754467 |
| C | -4.383182 | -3.843884 | 0.688712  |
| H | -2.601026 | -4.415065 | 1.762572  |
| H | -6.012196 | -2.992589 | -0.438105 |
| H | -4.874056 | -4.803041 | 0.828853  |

### TS1-L5

(U)B3LYP-D3(BJ) SCF energy: -2353.45331134 a.u.

(U)B3LYP-D3(BJ) enthalpy: -2352.765791 a.u.

(U)B3LYP-D3(BJ) free energy: -2352.879531 a.u.

(U)B3LYP-D3(BJ) SCF energy in solution: -2353.96987889 a.u.

(U)B3LYP-D3(BJ) enthalpy in solution: -2353.282359 a.u.

(U)B3LYP-D3(BJ) free energy in solution: -2353.396099 a.u.

Imaginary frequency: -340.8863 cm-1

Cartesian coordinates

| ATOM | X         | Y         | Z         |
|------|-----------|-----------|-----------|
| Co   | -0.342662 | -0.568252 | -0.164455 |
| P    | -0.764872 | 1.627531  | 0.099446  |
| N    | -0.652695 | -0.706218 | 1.985622  |
| C    | 0.590722  | -0.786023 | 2.770978  |
| C    | -1.568446 | 0.353280  | 2.435018  |
| C    | -1.091377 | 1.728777  | 1.945230  |
| H    | 0.403740  | -1.250914 | 3.751682  |
| H    | -1.674938 | 0.364441  | 3.532147  |
| H    | -2.553720 | 0.130765  | 2.014233  |
| H    | -0.149272 | 2.005023  | 2.430548  |
| H    | -1.827808 | 2.502223  | 2.186159  |
| H    | -1.103138 | -1.635593 | 2.008836  |
| H    | 0.941441  | 0.231058  | 2.966739  |
| H    | -0.940564 | -2.047246 | -0.632577 |
| C    | 1.661625  | -1.579351 | 2.019699  |
| H    | 2.614032  | -1.569733 | 2.561218  |
| H    | 1.326194  | -2.617841 | 1.922554  |
| P    | 1.839211  | -0.969856 | 0.257909  |
| C    | -1.776429 | -3.261950 | 0.303539  |
| O    | -1.321313 | -3.333697 | 1.472396  |
| C    | -3.132014 | -2.604989 | 0.105743  |
| C    | -3.695829 | -2.363065 | -1.154900 |
| C    | -3.868476 | -2.263189 | 1.246554  |
| C    | -4.961958 | -1.794682 | -1.270185 |
| H    | -3.126779 | -2.591999 | -2.050030 |
| C    | -5.131450 | -1.678513 | 1.134638  |
| H    | -3.435602 | -2.480897 | 2.217195  |

|   |           |           |           |
|---|-----------|-----------|-----------|
| C | -5.685851 | -1.447022 | -0.124338 |
| H | -5.382153 | -1.611173 | -2.255459 |
| H | -5.688104 | -1.417779 | 2.031037  |
| H | -6.673229 | -1.002404 | -0.214963 |
| C | -1.374247 | -4.350018 | -0.685457 |
| H | -1.591352 | -4.096196 | -1.724964 |
| H | -0.306715 | -4.551348 | -0.579107 |
| H | -1.928646 | -5.262973 | -0.425228 |
| C | -2.328262 | 2.322355  | -0.581391 |
| C | -3.402386 | 1.431461  | -0.735576 |
| C | -2.505509 | 3.670830  | -0.918787 |
| C | -4.637460 | 1.888189  | -1.193923 |
| H | -3.272052 | 0.376736  | -0.508662 |
| C | -3.738377 | 4.121781  | -1.392105 |
| H | -1.679007 | 4.367242  | -0.819041 |
| C | -4.807726 | 3.233800  | -1.524784 |
| H | -5.457676 | 1.185400  | -1.299873 |
| H | -3.863002 | 5.168285  | -1.657558 |
| H | -5.767011 | 3.588050  | -1.892192 |
| C | 0.483491  | 2.935045  | -0.191371 |
| C | 0.588175  | 4.090157  | 0.597336  |
| C | 1.399973  | 2.738960  | -1.234178 |
| C | 1.588950  | 5.029566  | 0.345903  |
| H | -0.113318 | 4.259820  | 1.409098  |
| C | 2.393373  | 3.681153  | -1.491411 |
| H | 1.345040  | 1.827529  | -1.822127 |
| C | 2.491010  | 4.826562  | -0.699823 |
| H | 1.663258  | 5.919249  | 0.965442  |
| H | 3.107515  | 3.507425  | -2.290078 |
| H | 3.274581  | 5.554478  | -0.890643 |
| C | 2.665170  | -2.409659 | -0.531207 |

|   |          |           |           |
|---|----------|-----------|-----------|
| C | 3.925737 | -2.871446 | -0.122114 |
| C | 1.981820 | -3.096596 | -1.542369 |
| C | 4.489693 | -4.000289 | -0.713663 |
| H | 4.470551 | -2.338891 | 0.652480  |
| C | 2.547130 | -4.228175 | -2.134811 |
| H | 0.997034 | -2.747598 | -1.839269 |
| C | 3.800225 | -4.680726 | -1.721697 |
| H | 5.465736 | -4.351026 | -0.389415 |
| H | 2.006516 | -4.755514 | -2.915965 |
| H | 4.240621 | -5.561290 | -2.181351 |
| C | 3.192920 | 0.277514  | 0.312973  |
| C | 3.207649 | 1.268040  | 1.307636  |
| C | 4.138888 | 0.359263  | -0.720845 |
| C | 4.148834 | 2.294685  | 1.283423  |
| H | 2.469244 | 1.250985  | 2.101819  |
| C | 5.080701 | 1.388070  | -0.746572 |
| H | 4.145529 | -0.392513 | -1.503891 |
| C | 5.091544 | 2.358101  | 0.256278  |
| H | 4.137055 | 3.053345  | 2.060678  |
| H | 5.808989 | 1.428673  | -1.552322 |
| H | 5.822180 | 3.161605  | 0.233635  |

### **TS2-L5**

(U)B3LYP-D3(BJ) SCF energy: -2353.46719800 a.u.

(U)B3LYP-D3(BJ) enthalpy: -2352.780223 a.u.

(U)B3LYP-D3(BJ) free energy: -2352.892813 a.u.

(U)B3LYP-D3(BJ) SCF energy in solution: -2353.97909997 a.u.

(U)B3LYP-D3(BJ) enthalpy in solution: -2353.292125 a.u.

(U)B3LYP-D3(BJ) free energy in solution: -2353.404715 a.u.

Imaginary frequency: -880.7010 cm-1

Cartesian coordinates

| ATOM | X         | Y         | Z         |
|------|-----------|-----------|-----------|
| Co   | -0.125280 | -0.966096 | 0.252786  |
| P    | -1.569125 | 0.773767  | 0.420374  |
| N    | -0.170339 | -1.082436 | 2.361229  |
| C    | 1.010063  | -0.578182 | 3.047327  |
| C    | -1.411073 | -0.540684 | 2.872298  |
| C    | -1.720247 | 0.862687  | 2.283177  |
| H    | 1.133962  | -1.045090 | 4.041842  |
| H    | -1.418771 | -0.467839 | 3.974466  |
| H    | -2.227757 | -1.225329 | 2.603601  |
| H    | -0.966032 | 1.578068  | 2.628915  |
| H    | -2.699287 | 1.240871  | 2.599639  |
| H    | -0.022188 | -2.352716 | 1.945376  |
| H    | 0.935521  | 0.505359  | 3.238227  |
| H    | -0.341655 | -4.847019 | 0.219484  |
| C    | 2.282924  | -0.846573 | 2.227864  |
| H    | 3.157128  | -0.375296 | 2.689578  |
| H    | 2.452332  | -1.927062 | 2.167780  |
| P    | 2.024033  | -0.295610 | 0.462868  |
| C    | -0.747679 | -3.914806 | 0.647197  |
| O    | 0.323627  | -3.224624 | 1.246851  |
| C    | -1.284239 | -3.088480 | -0.529728 |
| C    | -2.631468 | -2.761413 | -0.730347 |
| C    | -0.330974 | -2.596587 | -1.456023 |
| C    | -3.030198 | -1.974209 | -1.816673 |
| H    | -3.381938 | -3.116115 | -0.032058 |
| C    | -0.730412 | -1.776651 | -2.519084 |
| H    | 0.706397  | -2.901533 | -1.354725 |

|   |           |           |           |
|---|-----------|-----------|-----------|
| C | -2.083418 | -1.469713 | -2.703442 |
| H | -4.077793 | -1.718733 | -1.938244 |
| H | 0.012782  | -1.404794 | -3.219576 |
| H | -2.392756 | -0.832617 | -3.526548 |
| C | -1.819747 | -4.307489 | 1.667425  |
| H | -2.596921 | -4.943031 | 1.226146  |
| H | -1.343128 | -4.858836 | 2.482962  |
| H | -2.299933 | -3.419809 | 2.095686  |
| C | 3.343277  | -1.158574 | -0.474616 |
| C | 4.549690  | -1.579138 | 0.101909  |
| C | 3.124970  | -1.402151 | -1.838653 |
| C | 5.510371  | -2.236500 | -0.666777 |
| H | 4.741215  | -1.393282 | 1.153943  |
| C | 4.089480  | -2.048494 | -2.611939 |
| H | 2.190079  | -1.080765 | -2.289517 |
| C | 5.283167  | -2.471272 | -2.024533 |
| H | 6.438533  | -2.563590 | -0.206263 |
| H | 3.906195  | -2.229677 | -3.667466 |
| H | 6.032512  | -2.983770 | -2.621186 |
| C | 2.605312  | 1.451726  | 0.438233  |
| C | 3.577791  | 1.906308  | -0.463207 |
| C | 1.989234  | 2.387245  | 1.285900  |
| C | 3.926883  | 3.257470  | -0.510341 |
| H | 4.067624  | 1.203861  | -1.129264 |
| C | 2.347451  | 3.731639  | 1.248487  |
| H | 1.206670  | 2.067301  | 1.963327  |
| C | 3.317199  | 4.173495  | 0.346456  |
| H | 4.683353  | 3.590864  | -1.215994 |
| H | 1.850010  | 4.438025  | 1.906342  |
| H | 3.588697  | 5.224683  | 0.307160  |
| C | -3.326337 | 0.765685  | -0.131231 |

|   |           |           |           |
|---|-----------|-----------|-----------|
| C | -4.289238 | 0.026576  | 0.571579  |
| C | -3.700113 | 1.381925  | -1.334007 |
| C | -5.591309 | -0.092688 | 0.086421  |
| H | -4.020979 | -0.474453 | 1.496426  |
| C | -5.000546 | 1.259996  | -1.822103 |
| H | -2.968103 | 1.959138  | -1.890668 |
| C | -5.951657 | 0.520466  | -1.115312 |
| H | -6.324248 | -0.667141 | 0.646668  |
| H | -5.272817 | 1.746499  | -2.754985 |
| H | -6.965023 | 0.426563  | -1.495218 |
| C | -1.029180 | 2.445171  | -0.106344 |
| C | -1.463930 | 3.619888  | 0.522835  |
| C | -0.134772 | 2.537992  | -1.181176 |
| C | -0.999265 | 4.862454  | 0.093161  |
| H | -2.167109 | 3.562391  | 1.348961  |
| C | 0.320113  | 3.780719  | -1.620214 |
| H | 0.221428  | 1.624346  | -1.647989 |
| C | -0.106986 | 4.943608  | -0.979018 |
| H | -1.334839 | 5.767893  | 0.591728  |
| H | 1.028885  | 3.838262  | -2.440718 |
| H | 0.259444  | 5.911984  | -1.308125 |

### **TS3-L5**

(U)B3LYP-D3(BJ) SCF energy: -1968.46390445 a.u.

(U)B3LYP-D3(BJ) enthalpy: -1967.932093 a.u.

(U)B3LYP-D3(BJ) free energy: -1968.027295 a.u.

(U)B3LYP-D3(BJ) SCF energy in solution: -1968.86738266 a.u.

(U)B3LYP-D3(BJ) enthalpy in solution: -1968.335571 a.u.

(U)B3LYP-D3(BJ) free energy in solution: -1968.430773 a.u.



Imaginary frequency: -836.0055 cm<sup>-1</sup>

Cartesian coordinates

| ATOM | X         | Y         | Z         |
|------|-----------|-----------|-----------|
| Co   | -0.029541 | -1.660820 | -0.069260 |
| P    | -1.852179 | -0.349933 | 0.158400  |
| N    | -0.091108 | -1.999295 | 2.037984  |
| C    | 0.825342  | -1.186278 | 2.806459  |
| C    | -1.471144 | -1.884093 | 2.445709  |
| C    | -2.121929 | -0.543194 | 1.999463  |
| H    | 1.040365  | -1.623793 | 3.800553  |
| H    | -1.599405 | -1.982773 | 3.539228  |
| H    | -2.041082 | -2.710327 | 1.995566  |
| H    | -1.619835 | 0.297001  | 2.491278  |
| H    | -3.186916 | -0.495553 | 2.253686  |
| H    | 0.403455  | -0.184295 | 3.017986  |
| C    | 2.160624  | -0.995489 | 2.072137  |
| H    | 2.808299  | -0.275900 | 2.585657  |
| H    | 2.693479  | -1.952154 | 2.024257  |
| P    | 1.882000  | -0.523002 | 0.280448  |
| H    | 0.327591  | -3.036905 | 1.022335  |
| H    | 0.485650  | -3.415045 | 0.163288  |
| C    | 3.489554  | -0.988686 | -0.476681 |
| C    | 4.697093  | -0.368707 | -0.118593 |
| C    | 3.511845  | -2.036972 | -1.405288 |
| C    | 5.900566  | -0.790243 | -0.680105 |
| H    | 4.690688  | 0.452745  | 0.592140  |
| C    | 4.718288  | -2.461283 | -1.966693 |
| H    | 2.578845  | -2.523296 | -1.677176 |
| C    | 5.912670  | -1.838098 | -1.605582 |
| H    | 6.829843  | -0.303392 | -0.396918 |

|   |           |           |           |
|---|-----------|-----------|-----------|
| H | 4.723265  | -3.275861 | -2.685583 |
| H | 6.851832  | -2.165415 | -2.043008 |
| C | 1.942292  | 1.313421  | 0.248291  |
| C | 1.310238  | 2.065372  | 1.249932  |
| C | 2.510685  | 1.991698  | -0.841083 |
| C | 1.263798  | 3.456216  | 1.175337  |
| H | 0.843178  | 1.563352  | 2.090521  |
| C | 2.465466  | 3.383544  | -0.914271 |
| H | 3.002607  | 1.428787  | -1.628545 |
| C | 1.843613  | 4.120965  | 0.094453  |
| H | 0.763267  | 4.019620  | 1.957425  |
| H | 2.918939  | 3.891919  | -1.761106 |
| H | 1.803158  | 5.204815  | 0.034173  |
| C | -1.843295 | 1.455576  | -0.136969 |
| C | -2.515174 | 2.366237  | 0.691558  |
| C | -1.115854 | 1.940899  | -1.232698 |
| C | -2.464130 | 3.734859  | 0.424023  |
| H | -3.080617 | 2.006874  | 1.546126  |
| C | -1.072016 | 3.306471  | -1.504393 |
| H | -0.564071 | 1.241984  | -1.854346 |
| C | -1.745460 | 4.205623  | -0.675919 |
| H | -2.986556 | 4.432111  | 1.073412  |
| H | -0.491834 | 3.670219  | -2.346594 |
| H | -1.701169 | 5.271700  | -0.880460 |
| C | -3.460501 | -0.911366 | -0.541360 |
| C | -3.618472 | -2.286900 | -0.772098 |
| C | -4.526380 | -0.048435 | -0.829550 |
| C | -4.823685 | -2.792046 | -1.258936 |
| H | -2.789335 | -2.962885 | -0.574645 |
| C | -5.727383 | -0.553319 | -1.329124 |
| H | -4.415599 | 1.019429  | -0.670494 |

|   |           |           |           |
|---|-----------|-----------|-----------|
| C | -5.880933 | -1.924768 | -1.540487 |
| H | -4.932602 | -3.859642 | -1.428691 |
| H | -6.544539 | 0.126796  | -1.554136 |
| H | -6.817169 | -2.314929 | -1.929709 |

**acetophenone**

(U)B3LYP-D3(BJ) SCF energy: -384.91824646 a.u.  
 (U)B3LYP-D3(BJ) enthalpy: -384.770871 a.u.  
 (U)B3LYP-D3(BJ) free energy: -384.812231 a.u.  
 (U)B3LYP-D3(BJ) SCF energy in solution: -385.04487450 a.u.  
 (U)B3LYP-D3(BJ) enthalpy in solution: -384.897499 a.u.  
 (U)B3LYP-D3(BJ) free energy in solution: -384.938859 a.u.

Cartesian coordinates

| ATOM | X         | Y         | Z         |
|------|-----------|-----------|-----------|
| C    | -0.575665 | -1.220969 | 0.000009  |
| C    | 0.205867  | -0.055539 | -0.000058 |
| C    | -0.429056 | 1.194607  | -0.000052 |
| C    | -1.821070 | 1.277462  | 0.000002  |
| C    | -2.589530 | 0.112164  | 0.000027  |
| C    | -1.963977 | -1.138455 | 0.000014  |
| H    | -0.065331 | -2.178139 | 0.000060  |
| H    | 0.158375  | 2.107006  | -0.000162 |
| H    | -2.305331 | 2.249700  | 0.000066  |
| H    | -3.674005 | 0.177554  | 0.000078  |
| H    | -2.561884 | -2.045346 | -0.000021 |
| C    | 1.695647  | -0.204307 | -0.000014 |
| O    | 2.212944  | -1.311167 | -0.000017 |
| C    | 2.552554  | 1.050007  | 0.000041  |

|   |          |          |           |
|---|----------|----------|-----------|
| H | 2.346211 | 1.666251 | -0.883030 |
| H | 2.346445 | 1.665958 | 0.883391  |
| H | 3.603349 | 0.756533 | -0.000069 |

### phenylethanol

(U)B3LYP-D3(BJ) SCF energy: -386.11241113 a.u.

(U)B3LYP-D3(BJ) enthalpy: -385.941057 a.u.

(U)B3LYP-D3(BJ) free energy: -385.984024 a.u.

(U)B3LYP-D3(BJ) SCF energy in solution: -386.24652976 a.u.

(U)B3LYP-D3(BJ) enthalpy in solution: -386.075176 a.u.

(U)B3LYP-D3(BJ) free energy in solution: -386.118143 a.u.

### Cartesian coordinates

| ATOM | X         | Y         | Z         |
|------|-----------|-----------|-----------|
| C    | -0.576908 | -1.191310 | 0.102858  |
| C    | 0.151644  | 0.003430  | 0.181871  |
| C    | -0.545753 | 1.216307  | 0.109749  |
| C    | -1.933137 | 1.234293  | -0.041173 |
| C    | -2.647330 | 0.038694  | -0.124265 |
| C    | -1.962867 | -1.175375 | -0.050611 |
| H    | -0.041652 | -2.133040 | 0.162653  |
| H    | -0.010327 | 2.158279  | 0.170307  |
| H    | -2.454867 | 2.185811  | -0.097995 |
| H    | -3.726919 | 0.053312  | -0.244772 |
| H    | -2.508588 | -2.113158 | -0.111642 |
| C    | 1.665125  | -0.057203 | 0.369084  |
| O    | 2.203627  | -1.281966 | -0.134891 |
| C    | 2.418196  | 1.137269  | -0.222036 |
| H    | 2.185179  | 1.255939  | -1.287518 |

|   |          |           |           |
|---|----------|-----------|-----------|
| H | 2.167481 | 2.074781  | 0.284461  |
| H | 3.493483 | 0.968561  | -0.115603 |
| H | 1.972228 | -1.325362 | -1.077724 |
| H | 1.881147 | -0.106021 | 1.444096  |

## H2

(U)B3LYP-D3(BJ) SCF energy: -1.17562313002 a.u.  
(U)B3LYP-D3(BJ) enthalpy: -1.16218413 a.u.  
(U)B3LYP-D3(BJ) free energy: -1.17697613 a.u.  
(U)B3LYP-D3(BJ) SCF energy in solution: -1.179241 a.u.  
(U)B3LYP-D3(BJ) enthalpy in solution: -1.165802 a.u.  
(U)B3LYP-D3(BJ) free energy in solution: -1.180594 a.u.

### Cartesian coordinates

| ATOM | X          | Y          | Z           |
|------|------------|------------|-------------|
| H    | 0.00000000 | 0.00000000 | 0.37142100  |
| H    | 0.00000000 | 0.00000000 | -0.37142100 |

## 6

(U)B3LYP-D3(BJ) SCF energy: -1508.38683883 a.u.  
(U)B3LYP-D3(BJ) enthalpy: -1507.764702 a.u.  
(U)B3LYP-D3(BJ) free energy: -1507.872661 a.u.  
(U)B3LYP-D3(BJ) SCF energy in solution: -1508.78781236 a.u.  
(U)B3LYP-D3(BJ) enthalpy in solution: -1508.165676 a.u.  
(U)B3LYP-D3(BJ) free energy in solution: -1508.273635 a.u.

Cartesian coordinates

| ATOM | X         | Y         | Z         |
|------|-----------|-----------|-----------|
| Co   | 1.615461  | -0.015863 | 0.264308  |
| N    | 3.557511  | 0.100134  | -0.095486 |
| C    | 3.917441  | -2.320375 | -0.410612 |
| C    | 4.192378  | -0.902223 | -0.906550 |
| C    | 4.238487  | 1.361023  | -0.176658 |
| C    | 3.747563  | 2.338954  | 0.891695  |
| H    | 5.298343  | -0.807846 | -0.880573 |
| H    | 4.372520  | 3.237161  | 0.910378  |
| H    | 3.796620  | 1.849411  | 1.870312  |
| H    | 1.271866  | 0.739624  | 3.171008  |
| H    | 3.920517  | -0.854102 | -1.985474 |
| N    | 2.371882  | 2.778086  | 0.655346  |
| C    | 1.349964  | 1.893258  | 0.449592  |
| C    | 1.962207  | 4.093730  | 0.501931  |
| C    | 0.642342  | 4.059614  | 0.189382  |
| H    | 2.637320  | 4.925948  | 0.629082  |
| H    | -0.065972 | 4.844932  | -0.021169 |
| N    | 0.282118  | 2.712119  | 0.164613  |
| H    | 4.480174  | -3.043405 | -1.010984 |
| H    | 4.247094  | -2.396422 | 0.632789  |

|   |           |           |           |
|---|-----------|-----------|-----------|
| N | 2.508624  | -2.723512 | -0.473491 |
| C | 2.081214  | -4.016925 | -0.737628 |
| C | 1.472768  | -1.909801 | -0.106559 |
| C | 0.737029  | -4.035080 | -0.550553 |
| H | 2.763029  | -4.797725 | -1.037910 |
| H | 0.008552  | -4.823396 | -0.654594 |
| N | 0.382202  | -2.743060 | -0.169634 |
| C | -1.009597 | 2.254325  | -0.251229 |
| C | -2.069985 | 2.279662  | 0.664746  |
| C | -1.185900 | 1.840294  | -1.579868 |
| C | -3.341518 | 1.925986  | 0.207813  |
| C | -2.474029 | 1.484397  | -1.988306 |
| C | -3.564502 | 1.538908  | -1.116506 |
| H | -4.176072 | 1.954294  | 0.904409  |
| H | -2.628060 | 1.164701  | -3.016268 |
| C | -0.942334 | -2.346694 | 0.204303  |
| C | -1.868080 | -2.024950 | -0.795749 |
| C | -1.275797 | -2.311903 | 1.566689  |
| C | -3.168794 | -1.698387 | -0.404805 |
| C | -2.582641 | -1.960253 | 1.910704  |
| C | -3.542891 | -1.658575 | 0.940246  |
| H | -3.901963 | -1.460135 | -1.169888 |
| H | -2.858689 | -1.931040 | 2.962419  |

|   |           |           |           |
|---|-----------|-----------|-----------|
| C | -1.831869 | 2.661270  | 2.103541  |
| H | -1.072787 | 2.012294  | 2.553635  |
| H | -1.465183 | 3.689977  | 2.198170  |
| H | -2.753342 | 2.572962  | 2.686282  |
| C | -4.955495 | 1.208544  | -1.599836 |
| H | -5.552603 | 0.737947  | -0.812439 |
| H | -5.489684 | 2.113956  | -1.916782 |
| H | -4.929429 | 0.530044  | -2.459026 |
| C | -0.019445 | 1.778521  | -2.532318 |
| H | 0.510671  | 2.736809  | -2.578431 |
| H | 0.714567  | 1.032226  | -2.201418 |
| H | -0.354332 | 1.519105  | -3.540932 |
| C | -0.249925 | -2.638129 | 2.621428  |
| H | 0.221599  | -3.609910 | 2.435110  |
| H | 0.552933  | -1.892051 | 2.624631  |
| H | -0.707451 | -2.660598 | 3.614757  |
| C | -1.458171 | -2.005175 | -2.245868 |
| H | -0.627913 | -1.306767 | -2.399626 |
| H | -1.115256 | -2.987894 | -2.589744 |
| H | -2.292351 | -1.692006 | -2.879789 |
| C | -4.943067 | -1.268353 | 1.344290  |
| H | -4.996022 | -0.198480 | 1.583473  |
| H | -5.660955 | -1.461093 | 0.540471  |



|   |           |           |           |
|---|-----------|-----------|-----------|
| H | -5.272348 | -1.816795 | 2.233377  |
| H | 5.330421  | 1.250278  | -0.005735 |
| H | 4.146487  | 1.870282  | -1.164798 |
| H | 1.169752  | 0.789667  | 3.909617  |

## 6b

(U)B3LYP-D3(BJ) SCF energy: -1508.38182394 a.u.

(U)B3LYP-D3(BJ) enthalpy: -1507.759801 a.u.

(U)B3LYP-D3(BJ) free energy: -1507.864497 a.u.

(U)B3LYP-D3(BJ) SCF energy in solution: -1508.78538110 a.u.

(U)B3LYP-D3(BJ) enthalpy in solution: -1508.163358 a.u.

(U)B3LYP-D3(BJ) free energy in solution: -1508.268054 a.u.

## Cartesian coordinates

| ATOM | X         | Y         | Z         |
|------|-----------|-----------|-----------|
| Co   | -1.714352 | -0.026099 | -0.533030 |
| N    | -3.666235 | 0.172041  | -0.059313 |
| C    | -4.011865 | -2.225769 | 0.387194  |
| C    | -4.322283 | -0.786582 | 0.781515  |
| C    | -4.271365 | 1.461019  | 0.097422  |
| C    | -3.713985 | 2.475055  | -0.896107 |

|   |           |           |           |
|---|-----------|-----------|-----------|
| H | -5.429447 | -0.703514 | 0.712444  |
| H | -4.298007 | 3.400263  | -0.874472 |
| H | -3.761184 | 2.048909  | -1.904699 |
| H | -4.093583 | -0.671217 | 1.867907  |
| N | -2.327187 | 2.839223  | -0.607788 |
| C | -1.324004 | 1.915053  | -0.497902 |
| C | -1.878859 | 4.133304  | -0.393891 |
| C | -0.551438 | 4.047640  | -0.136353 |
| H | -2.536629 | 4.987044  | -0.446158 |
| H | 0.189208  | 4.799977  | 0.082875  |
| N | -0.227425 | 2.691264  | -0.202680 |
| H | -4.620659 | -2.918645 | 0.977095  |
| H | -4.254073 | -2.359910 | -0.674155 |
| N | -2.614336 | -2.612974 | 0.590576  |
| C | -2.211614 | -3.833252 | 1.114784  |
| C | -1.557028 | -1.874417 | 0.134631  |
| C | -0.860978 | -3.881369 | 1.004695  |
| H | -2.914281 | -4.545042 | 1.519882  |
| H | -0.141849 | -4.630929 | 1.294452  |
| N | -0.478805 | -2.681687 | 0.406243  |
| C | 1.098725  | 2.229212  | 0.076867  |
| C | 1.982269  | 1.987301  | -0.981654 |
| C | 1.505506  | 2.142614  | 1.417462  |

|   |          |           |           |
|---|----------|-----------|-----------|
| C | 3.318383 | 1.714906  | -0.670816 |
| C | 2.848247 | 1.867057  | 1.679999  |
| C | 3.773988 | 1.675844  | 0.648230  |
| H | 4.020830 | 1.547046  | -1.483416 |
| H | 3.181028 | 1.812356  | 2.714468  |
| C | 0.872142 | -2.374721 | 0.048501  |
| C | 1.705932 | -1.764660 | 0.993132  |
| C | 1.331432 | -2.741057 | -1.224783 |
| C | 3.042020 | -1.553008 | 0.646239  |
| C | 2.669276 | -2.488866 | -1.535786 |
| C | 3.539850 | -1.904025 | -0.610981 |
| H | 3.704330 | -1.096740 | 1.374852  |
| H | 3.042887 | -2.769112 | -2.518244 |
| C | 1.504274 | 2.036990  | -2.409482 |
| H | 0.769319 | 1.246359  | -2.597372 |
| H | 1.009749 | 2.988965  | -2.633738 |
| H | 2.338561 | 1.907164  | -3.104890 |
| C | 5.230164 | 1.435889  | 0.964714  |
| H | 5.820174 | 1.298675  | 0.054093  |
| H | 5.658559 | 2.279490  | 1.519470  |
| H | 5.365796 | 0.542467  | 1.586559  |
| C | 0.512689 | 2.352769  | 2.532563  |
| H | 0.177229 | 3.395514  | 2.585041  |

|   |           |           |           |
|---|-----------|-----------|-----------|
| H | -0.382336 | 1.741008  | 2.375443  |
| H | 0.952227  | 2.088651  | 3.498669  |
| C | 0.406689  | -3.401024 | -2.215671 |
| H | 0.001103  | -4.339904 | -1.820482 |
| H | -0.451142 | -2.758170 | -2.440722 |
| H | 0.930590  | -3.620782 | -3.150390 |
| C | 1.164602  | -1.352144 | 2.337308  |
| H | 0.302599  | -0.688068 | 2.213942  |
| H | 0.821533  | -2.216538 | 2.918508  |
| H | 1.926913  | -0.825732 | 2.917527  |
| C | 4.978312  | -1.636008 | -0.978570 |
| H | 5.075409  | -0.679695 | -1.508266 |
| H | 5.616163  | -1.581862 | -0.090896 |
| H | 5.375465  | -2.415192 | -1.637928 |
| H | -5.369428 | 1.429940  | -0.080701 |
| H | -4.158704 | 1.897594  | 1.119449  |
| H | -1.491179 | 0.036786  | -2.436589 |
| H | -1.578238 | -0.724063 | -2.306563 |

**6c**

(U)B3LYP-D3(BJ) SCF energy: -1508.38811150 a.u.

(U)B3LYP-D3(BJ) enthalpy: -1507.765209 a.u.

(U)B3LYP-D3(BJ) free energy: -1507.870824 a.u.

(U)B3LYP-D3(BJ) SCF energy in solution: -1508.78888289 a.u.

(U)B3LYP-D3(BJ) enthalpy in solution: -1508.165980 a.u.

(U)B3LYP-D3(BJ) free energy in solution: -1508.271595 a.u.

#### Cartesian coordinates

| ATOM | X        | Y         | Z         |
|------|----------|-----------|-----------|
| Co   | 1.593212 | -0.011223 | 0.287498  |
| N    | 3.546500 | 0.093033  | -0.069697 |
| C    | 3.869383 | -2.324979 | -0.460600 |
| C    | 4.163016 | -0.896557 | -0.913774 |
| C    | 4.222402 | 1.357234  | -0.173959 |
| C    | 3.734381 | 2.348713  | 0.882676  |
| H    | 5.270610 | -0.819751 | -0.886032 |
| H    | 4.360415 | 3.246186  | 0.887552  |
| H    | 3.786292 | 1.874546  | 1.868093  |
| H    | 4.995065 | -0.432168 | 1.819424  |
| H    | 3.890732 | -0.806762 | -1.988807 |
| N    | 2.358240 | 2.786348  | 0.646145  |
| C    | 1.332917 | 1.900766  | 0.464594  |
| C    | 1.951778 | 4.099781  | 0.468136  |
| C    | 0.629823 | 4.063402  | 0.164633  |

|   |           |           |           |
|---|-----------|-----------|-----------|
| H | 2.629910  | 4.932375  | 0.575126  |
| H | -0.078011 | 4.846457  | -0.055729 |
| N | 0.265745  | 2.716855  | 0.169593  |
| H | 4.416376  | -3.034782 | -1.090280 |
| H | 4.208533  | -2.443802 | 0.574762  |
| N | 2.455062  | -2.709121 | -0.521231 |
| C | 2.012101  | -3.990772 | -0.815830 |
| C | 1.432211  | -1.896938 | -0.117148 |
| C | 0.670688  | -4.002233 | -0.610623 |
| H | 2.682738  | -4.769134 | -1.146102 |
| H | -0.066119 | -4.781258 | -0.725153 |
| N | 0.332897  | -2.718490 | -0.188209 |
| C | -1.031141 | 2.256410  | -0.227187 |
| C | -2.077235 | 2.277684  | 0.705022  |
| C | -1.227142 | 1.845660  | -1.553889 |
| C | -3.355489 | 1.925287  | 0.266453  |
| C | -2.521472 | 1.492230  | -1.944475 |
| C | -3.598670 | 1.544357  | -1.056166 |
| H | -4.179261 | 1.950177  | 0.975893  |
| H | -2.691070 | 1.175767  | -2.970967 |
| C | -0.984529 | -2.322839 | 0.210463  |
| C | -1.931618 | -2.012700 | -0.773424 |
| C | -1.292321 | -2.281124 | 1.578871  |

|   |           |           |           |
|---|-----------|-----------|-----------|
| C | -3.226948 | -1.692928 | -0.359786 |
| C | -2.594732 | -1.935560 | 1.945276  |
| C | -3.575738 | -1.647279 | 0.991768  |
| H | -3.976026 | -1.464045 | -1.112275 |
| H | -2.850923 | -1.901756 | 3.001875  |
| C | -1.815550 | 2.653467  | 2.141104  |
| H | -1.050091 | 2.000332  | 2.575406  |
| H | -1.444605 | 3.680847  | 2.233312  |
| H | -2.727331 | 2.564635  | 2.738769  |
| C | -4.997141 | 1.217754  | -1.519971 |
| H | -5.581621 | 0.740423  | -0.727211 |
| H | -5.536291 | 2.125794  | -1.820504 |
| H | -4.984727 | 0.546638  | -2.385192 |
| C | -0.073623 | 1.782883  | -2.521899 |
| H | 0.454127  | 2.741861  | -2.579197 |
| H | 0.665605  | 1.038888  | -2.197641 |
| H | -0.421284 | 1.518671  | -3.524915 |
| C | -0.245922 | -2.593092 | 2.617707  |
| H | 0.245980  | -3.551585 | 2.416526  |
| H | 0.540378  | -1.828653 | 2.616814  |
| H | -0.690327 | -2.634838 | 3.616418  |
| C | -1.550085 | -1.995903 | -2.231426 |
| H | -0.718992 | -1.302280 | -2.401548 |

|   |           |           |           |
|---|-----------|-----------|-----------|
| H | -1.220254 | -2.980304 | -2.583083 |
| H | -2.394798 | -1.677503 | -2.848545 |
| C | -4.970762 | -1.264756 | 1.420277  |
| H | -5.025243 | -0.195659 | 1.662767  |
| H | -5.701271 | -1.459706 | 0.628485  |
| H | -5.282160 | -1.816499 | 2.313777  |
| H | 5.315267  | 1.251067  | -0.005372 |
| H | 4.123848  | 1.845936  | -1.170158 |
| H | 5.617202  | -0.505288 | 2.234153  |

#### 6-L4

(U)B3LYP-D3(BJ) SCF energy: -1516.01700505 a.u.

(U)B3LYP-D3(BJ) enthalpy: -1515.469774 a.u.

(U)B3LYP-D3(BJ) free energy: -1515.562407 a.u.

(U)B3LYP-D3(BJ) SCF energy in solution: -1516.29734222 a.u.

(U)B3LYP-D3(BJ) enthalpy in solution: -1515.750111 a.u.

(U)B3LYP-D3(BJ) free energy in solution: -1515.842744 a.u.

Cartesian coordinates

| ATOM | X        | Y         | Z         |
|------|----------|-----------|-----------|
| Co   | 0.000924 | -0.116667 | -0.055458 |



|   |           |           |           |
|---|-----------|-----------|-----------|
| P | -2.217702 | 0.009442  | -0.113864 |
| N | 0.001942  | 1.788223  | 0.129665  |
| C | 1.189053  | 2.575635  | 0.379857  |
| C | -1.177661 | 2.618953  | 0.036716  |
| C | -2.389967 | 1.826778  | -0.493774 |
| C | -3.308309 | -0.759227 | -1.437329 |
| C | -4.808602 | -0.493994 | -1.265335 |
| C | -3.008719 | -2.251548 | -1.634349 |
| C | -3.147341 | -0.207989 | 1.498840  |
| C | -3.171762 | -1.678849 | 1.933687  |
| C | -2.504562 | 0.665888  | 2.585526  |
| H | 1.009282  | 3.334537  | 1.166745  |
| H | -1.013851 | 3.481179  | -0.639919 |
| H | -1.434101 | 3.069737  | 1.017103  |
| H | -2.412887 | 1.886877  | -1.588195 |
| H | -3.336743 | 2.238635  | -0.122814 |
| H | -5.209913 | -1.022748 | -0.393601 |
| H | -5.362297 | -0.846748 | -2.144412 |
| H | -5.023990 | 0.572763  | -1.141238 |
| H | -1.936365 | -2.424210 | -1.770542 |
| H | -3.533300 | -2.630961 | -2.520200 |
| H | -3.336725 | -2.849171 | -0.777809 |
| H | -3.727177 | -2.310143 | 1.234126  |

|   |           |           |           |
|---|-----------|-----------|-----------|
| H | -3.646927 | -1.775763 | 2.917803  |
| H | -2.153013 | -2.077674 | 2.011396  |
| H | -1.443099 | 0.423373  | 2.704300  |
| H | -3.009556 | 0.500889  | 3.545650  |
| H | -2.573236 | 1.730585  | 2.346717  |
| H | -0.412682 | -0.575290 | -3.501821 |
| H | 1.492282  | 3.155248  | -0.515323 |
| C | 2.364923  | 1.691570  | 0.841566  |
| H | 3.334655  | 2.149167  | 0.609045  |
| H | 2.313022  | 1.564114  | 1.929174  |
| P | 2.212582  | -0.030630 | 0.142532  |
| C | 3.293754  | 0.007626  | -1.387528 |
| C | 3.159226  | -1.045811 | 1.410095  |
| C | 2.808332  | 1.114266  | -2.335043 |
| H | 3.392463  | 1.094866  | -3.263655 |
| H | 1.752608  | 0.979279  | -2.589660 |
| H | 2.917050  | 2.107387  | -1.890605 |
| C | 3.297231  | -1.352688 | -2.096517 |
| H | 3.878189  | -1.295664 | -3.025457 |
| H | 3.736860  | -2.140941 | -1.478329 |
| H | 2.276769  | -1.657960 | -2.355982 |
| C | 2.818490  | -2.539582 | 1.319141  |
| H | 3.252594  | -3.082009 | 2.168373  |

|   |           |           |           |
|---|-----------|-----------|-----------|
| H | 1.734785  | -2.697497 | 1.327653  |
| H | 3.214138  | -2.992174 | 0.403893  |
| C | 4.672998  | -0.804200 | 1.426688  |
| H | 5.148818  | -1.197350 | 0.521349  |
| H | 4.916773  | 0.261179  | 1.500556  |
| H | 5.132242  | -1.312680 | 2.283571  |
| H | 2.740942  | -0.674942 | 2.356373  |
| H | 4.316307  | 0.247175  | -1.068759 |
| H | -2.969742 | -0.239251 | -2.343800 |
| H | -4.177784 | 0.134882  | 1.339033  |
| H | -0.330636 | -0.379397 | -2.784495 |

#### **6b-L4**

(U)B3LYP-D3(BJ) SCF energy: -1516.01450983 a.u.

(U)B3LYP-D3(BJ) enthalpy: -1515.466427 a.u.

(U)B3LYP-D3(BJ) free energy: -1515.553804 a.u.

(U)B3LYP-D3(BJ) SCF energy in solution: -1516.29856939 a.u.

(U)B3LYP-D3(BJ) enthalpy in solution: -1515.750487 a.u.

(U)B3LYP-D3(BJ) free energy in solution: -1515.837864 a.u.

Cartesian coordinates

| ATOM | X         | Y         | Z         |
|------|-----------|-----------|-----------|
| Co   | 0.006698  | -0.950552 | 0.652000  |
| P    | 1.972823  | 0.068872  | -0.024131 |
| N    | 0.020696  | -2.028469 | -0.938554 |
| C    | -0.908925 | -1.688702 | -1.997377 |
| C    | 1.364394  | -2.276883 | -1.428378 |
| C    | 2.201005  | -0.970514 | -1.566444 |
| C    | 2.186674  | 1.809724  | -0.700710 |
| C    | 3.605935  | 2.141506  | -1.175812 |
| C    | 1.634187  | 2.872186  | 0.258015  |
| C    | 3.538890  | -0.276364 | 0.951918  |
| C    | 3.609322  | 0.594504  | 2.212486  |
| C    | 3.592953  | -1.765115 | 1.325034  |
| H    | -1.058190 | -2.538161 | -2.690769 |
| H    | 1.354606  | -2.786751 | -2.407710 |
| H    | 1.882613  | -2.955421 | -0.739321 |
| H    | 1.804065  | -0.378817 | -2.400643 |
| H    | 3.259157  | -1.170943 | -1.783148 |
| H    | 4.305796  | 2.201926  | -0.335285 |
| H    | 3.620518  | 3.114289  | -1.683221 |
| H    | 3.985442  | 1.391890  | -1.878392 |
| H    | 0.628176  | 2.608173  | 0.597334  |
| H    | 1.588182  | 3.849064  | -0.239346 |

|   |           |           |           |
|---|-----------|-----------|-----------|
| H | 2.264568  | 2.984134  | 1.145824  |
| H | 3.707962  | 1.657594  | 1.975758  |
| H | 4.474359  | 0.308830  | 2.823847  |
| H | 2.708542  | 0.469099  | 2.825175  |
| H | 2.708164  | -2.059578 | 1.902620  |
| H | 4.477907  | -1.967519 | 1.941069  |
| H | 3.645715  | -2.408775 | 0.442712  |
| H | -0.548441 | -0.853536 | -2.633969 |
| C | -2.273616 | -1.300185 | -1.412037 |
| H | -2.950332 | -0.917036 | -2.185486 |
| H | -2.733315 | -2.195095 | -0.976288 |
| P | -2.050240 | -0.086838 | -0.001789 |
| C | -2.533444 | 1.543702  | -0.802960 |
| C | -3.516643 | -0.538051 | 1.089278  |
| C | -1.551433 | 1.878454  | -1.932203 |
| H | -1.822615 | 2.833313  | -2.399571 |
| H | -0.533500 | 1.972501  | -1.543370 |
| H | -1.542565 | 1.111710  | -2.712140 |
| C | -2.589571 | 2.684954  | 0.219675  |
| H | -2.753369 | 3.643639  | -0.288278 |
| H | -3.399205 | 2.551045  | 0.942223  |
| H | -1.649829 | 2.758689  | 0.779038  |
| C | -3.401100 | 0.050861  | 2.502170  |

|   |           |           |           |
|---|-----------|-----------|-----------|
| H | -4.180965 | -0.367332 | 3.150883  |
| H | -2.428926 | -0.176963 | 2.949174  |
| H | -3.523404 | 1.138496  | 2.503457  |
| C | -4.890218 | -0.261328 | 0.467256  |
| H | -5.081320 | 0.814269  | 0.381437  |
| H | -4.982824 | -0.701043 | -0.531546 |
| H | -5.685705 | -0.684280 | 1.093569  |
| H | -3.395714 | -1.626246 | 1.182463  |
| H | -3.530452 | 1.410258  | -1.242239 |
| H | 1.533473  | 1.791254  | -1.582952 |
| H | 4.400041  | -0.048549 | 0.310837  |
| H | -0.197677 | -1.204190 | 2.329440  |
| H | 0.074131  | -0.428763 | 2.272015  |

#### **6c-L4**

(U)B3LYP-D3(BJ) SCF energy: -1516.01825176 a.u.

(U)B3LYP-D3(BJ) enthalpy: -1515.470509 a.u.

(U)B3LYP-D3(BJ) free energy: -1515.561383 a.u.

(U)B3LYP-D3(BJ) SCF energy in solution: -1516.29756012 a.u.

(U)B3LYP-D3(BJ) enthalpy in solution: -1515.749817 a.u.

(U)B3LYP-D3(BJ) free energy in solution: -1515.840691 a.u.

Cartesian coordinates

| ATOM | X         | Y         | Z         |
|------|-----------|-----------|-----------|
| Co   | 0.005317  | 0.077366  | -0.117655 |
| P    | -2.206771 | 0.068430  | 0.094637  |
| N    | 0.015484  | -1.641147 | 0.731756  |
| C    | 1.213709  | -2.391387 | 1.045975  |
| C    | -1.180519 | -2.321262 | 1.183617  |
| C    | -2.375258 | -1.352270 | 1.293861  |
| C    | -3.111200 | 1.441247  | 1.005166  |
| C    | -4.625945 | 1.237349  | 1.125957  |
| C    | -2.756911 | 2.828745  | 0.452826  |
| C    | -3.320953 | -0.419977 | -1.329318 |
| C    | -3.431314 | 0.698648  | -2.372606 |
| C    | -2.779638 | -1.704204 | -1.971456 |
| H    | 1.106057  | -3.458803 | 0.771400  |
| H    | -1.029375 | -2.780653 | 2.178669  |
| H    | -1.447037 | -3.163407 | 0.513212  |
| H    | -2.368678 | -0.889893 | 2.287782  |
| H    | -3.334106 | -1.873386 | 1.179864  |
| H    | -5.119992 | 1.325687  | 0.152088  |
| H    | -5.063330 | 1.998165  | 1.784399  |
| H    | -4.873445 | 0.254340  | 1.541140  |

|   |           |           |           |
|---|-----------|-----------|-----------|
| H | -1.671394 | 2.965434  | 0.401937  |
| H | -3.172738 | 3.612803  | 1.097995  |
| H | -3.159173 | 2.983108  | -0.553501 |
| H | -3.932599 | 1.587197  | -1.978269 |
| H | -4.004866 | 0.351753  | -3.241140 |
| H | -2.437734 | 1.000518  | -2.725779 |
| H | -1.767916 | -1.547480 | -2.359438 |
| H | -3.424255 | -2.008879 | -2.805470 |
| H | -2.732630 | -2.533568 | -1.260177 |
| H | 0.114821  | -2.913941 | -1.398648 |
| H | 1.415843  | -2.391404 | 2.135207  |
| C | 2.440280  | -1.837265 | 0.293465  |
| H | 3.371638  | -2.029454 | 0.840139  |
| H | 2.521844  | -2.335862 | -0.678887 |
| P | 2.224096  | -0.027857 | -0.102323 |
| C | 3.138497  | 0.843241  | 1.281649  |
| C | 3.301609  | 0.160696  | -1.629880 |
| C | 2.489645  | 0.480500  | 2.625294  |
| H | 2.991173  | 1.015758  | 3.441345  |
| H | 1.428819  | 0.754150  | 2.631950  |
| H | 2.553813  | -0.590908 | 2.834582  |
| C | 3.146228  | 2.363399  | 1.078196  |
| H | 3.607833  | 2.860078  | 1.940703  |



|   |           |           |           |
|---|-----------|-----------|-----------|
| H | 3.705868  | 2.660060  | 0.186378  |
| H | 2.123549  | 2.746725  | 0.976934  |
| C | 2.963494  | 1.433978  | -2.417430 |
| H | 3.489962  | 1.437293  | -3.380054 |
| H | 1.888163  | 1.501256  | -2.613598 |
| H | 3.260731  | 2.338727  | -1.877254 |
| C | 4.807011  | 0.027087  | -1.371835 |
| H | 5.188998  | 0.874663  | -0.791947 |
| H | 5.048139  | -0.891210 | -0.825548 |
| H | 5.357571  | 0.006009  | -2.320586 |
| H | 2.980514  | -0.693538 | -2.242322 |
| H | 4.173210  | 0.476555  | 1.282362  |
| H | -2.674017 | 1.372924  | 2.011104  |
| H | -4.317436 | -0.625353 | -0.916865 |
| H | 0.177942  | -3.536065 | -1.810923 |

## 6-L5

(U)B3LYP-D3(BJ) SCF energy: -1968.48529694 a.u.

(U)B3LYP-D3(BJ) enthalpy: -1967.951523 a.u.

(U)B3LYP-D3(BJ) free energy: -1968.054668 a.u.

(U)B3LYP-D3(BJ) SCF energy in solution: -1968.88477379 a.u.

(U)B3LYP-D3(BJ) enthalpy in solution: -1968.351000 a.u.

(U)B3LYP-D3(BJ) free energy in solution: -1968.454145 a.u.

Cartesian coordinates

| ATOM | X         | Y         | Z         |
|------|-----------|-----------|-----------|
| Co   | -0.000704 | -0.009646 | 0.014570  |
| P    | 2.202221  | 0.237013  | -0.146628 |
| N    | 0.001461  | 0.005038  | -1.913416 |
| C    | -1.159903 | -0.302639 | -2.720776 |
| C    | 1.159141  | 0.340258  | -2.715199 |
| C    | 2.253368  | 0.988706  | -1.850834 |
| H    | -0.912050 | -0.994072 | -3.548651 |
| H    | 0.901706  | 1.045051  | -3.528670 |
| H    | 1.584681  | -0.550371 | -3.220488 |
| H    | 2.035541  | 2.052656  | -1.702324 |
| H    | 3.241849  | 0.896742  | -2.314326 |
| H    | -1.575197 | 0.603503  | -3.206869 |
| C    | -2.261167 | -0.954239 | -1.868134 |
| H    | -3.246780 | -0.848983 | -2.334925 |
| H    | -2.051263 | -2.021420 | -1.731349 |
| P    | -2.207286 | -0.218733 | -0.157827 |
| C    | 3.141995  | -1.332152 | -0.347478 |
| C    | 2.528517  | -2.356798 | -1.089240 |

|   |           |           |           |
|---|-----------|-----------|-----------|
| C | 4.409733  | -1.555526 | 0.204407  |
| C | 3.184074  | -3.569844 | -1.289587 |
| H | 1.531816  | -2.193101 | -1.490344 |
| C | 5.058154  | -2.776964 | 0.010051  |
| H | 4.892497  | -0.778760 | 0.788024  |
| C | 4.450703  | -3.783990 | -0.740166 |
| H | 2.702029  | -4.352753 | -1.868957 |
| H | 6.040050  | -2.939169 | 0.446638  |
| H | 4.958045  | -4.732793 | -0.891675 |
| C | 3.314221  | 1.305935  | 0.842771  |
| C | 4.497676  | 1.854555  | 0.324417  |
| C | 2.960437  | 1.588000  | 2.169072  |
| C | 5.307636  | 2.666521  | 1.117385  |
| H | 4.790149  | 1.641859  | -0.699500 |
| C | 3.772932  | 2.396316  | 2.965437  |
| H | 2.038816  | 1.173803  | 2.570148  |
| C | 4.946852  | 2.937367  | 2.439718  |
| H | 6.220343  | 3.087646  | 0.704874  |
| H | 3.486714  | 2.607592  | 3.991916  |
| H | 5.578376  | 3.570913  | 3.056239  |
| C | -3.346808 | -1.267350 | 0.821294  |
| C | -4.498847 | -1.854591 | 0.275918  |
| C | -3.048222 | -1.488706 | 2.172711  |

|   |           |           |           |
|---|-----------|-----------|-----------|
| C | -5.332603 | -2.644569 | 1.066927  |
| H | -4.748944 | -1.690195 | -0.767764 |
| C | -3.884953 | -2.273538 | 2.966712  |
| H | -2.149459 | -1.047195 | 2.595425  |
| C | -5.027593 | -2.853786 | 2.413950  |
| H | -6.220633 | -3.096021 | 0.633172  |
| H | -3.641378 | -2.437513 | 4.012666  |
| H | -5.677348 | -3.470212 | 3.028873  |
| C | -3.113242 | 1.371734  | -0.350756 |
| C | -2.453493 | 2.408403  | -1.033896 |
| C | -4.404087 | 1.594691  | 0.144961  |
| C | -3.084818 | 3.635344  | -1.229556 |
| H | -1.443404 | 2.239237  | -1.398375 |
| C | -5.028333 | 2.829316  | -0.044562 |
| H | -4.923039 | 0.807253  | 0.681446  |
| C | -4.373513 | 3.849908  | -0.734393 |
| H | -2.567435 | 4.427862  | -1.763630 |
| H | -6.028477 | 2.991488  | 0.348444  |
| H | -4.862099 | 4.809134  | -0.881888 |
| H | 0.124389  | -2.372079 | 1.060974  |
| H | 0.198125  | -2.993309 | 1.471311  |

## 6b-L5

(U)B3LYP-D3(BJ) SCF energy: -1968.48836584 a.u.

(U)B3LYP-D3(BJ) enthalpy: -1967.953769 a.u.

(U)B3LYP-D3(BJ) free energy: -1968.049754 a.u.

(U)B3LYP-D3(BJ) SCF energy in solution: -1968.89093003 a.u.

(U)B3LYP-D3(BJ) enthalpy in solution: -1968.356333 a.u.

(U)B3LYP-D3(BJ) free energy in solution: -1968.452318 a.u.

Cartesian coordinates

| ATOM | X         | Y         | Z        |
|------|-----------|-----------|----------|
| Co   | -0.066166 | -1.768645 | 0.050074 |
| P    | -1.835499 | -0.301340 | 0.130999 |
| N    | -0.165122 | -1.970313 | 1.954427 |
| C    | 0.853485  | -1.372682 | 2.798128 |
| C    | -1.508785 | -1.750753 | 2.466348 |
| C    | -2.089874 | -0.392555 | 1.985532 |
| H    | 1.046356  | -1.980963 | 3.701813 |
| H    | -1.538986 | -1.775118 | 3.568753 |
| H    | -2.175211 | -2.555359 | 2.128267 |
| H    | -1.510048 | 0.427912  | 2.423893 |
| H    | -3.141211 | -0.254723 | 2.266462 |
| H    | 0.543720  | -0.381003 | 3.183876 |

|   |           |           |           |
|---|-----------|-----------|-----------|
| C | 2.185408  | -1.203220 | 2.051200  |
| H | 2.880843  | -0.560121 | 2.601982  |
| H | 2.659131  | -2.183733 | 1.922692  |
| P | 1.888159  | -0.606748 | 0.301678  |
| H | 0.005997  | -2.772368 | -1.334908 |
| H | -0.116016 | -2.014910 | -1.629985 |
| C | 3.488339  | -0.999007 | -0.511005 |
| C | 4.716484  | -0.550103 | 0.000425  |
| C | 3.483214  | -1.791822 | -1.665086 |
| C | 5.911707  | -0.892562 | -0.628206 |
| H | 4.733402  | 0.078544  | 0.886177  |
| C | 4.680720  | -2.135462 | -2.296992 |
| H | 2.535218  | -2.140497 | -2.064634 |
| C | 5.895244  | -1.687142 | -1.778570 |
| H | 6.856688  | -0.540268 | -0.223752 |
| H | 4.663371  | -2.751806 | -3.191535 |
| H | 6.827953  | -1.953619 | -2.267913 |
| C | 1.932372  | 1.226891  | 0.395183  |
| C | 1.179653  | 1.899412  | 1.371142  |
| C | 2.605160  | 1.987801  | -0.573048 |
| C | 1.113951  | 3.290812  | 1.388266  |
| H | 0.633524  | 1.333569  | 2.117013  |
| C | 2.538093  | 3.380880  | -0.555202 |

|   |           |           |           |
|---|-----------|-----------|-----------|
| H | 3.189409  | 1.489334  | -1.339946 |
| C | 1.793585  | 4.037565  | 0.425327  |
| H | 0.518223  | 3.790766  | 2.146284  |
| H | 3.070239  | 3.953243  | -1.310498 |
| H | 1.735920  | 5.122205  | 0.434224  |
| C | -1.793678 | 1.490967  | -0.237400 |
| C | -2.510404 | 2.437077  | 0.510157  |
| C | -0.984078 | 1.929415  | -1.293717 |
| C | -2.421964 | 3.794594  | 0.201662  |
| H | -3.138938 | 2.112478  | 1.334320  |
| C | -0.898955 | 3.285202  | -1.604849 |
| H | -0.400374 | 1.201339  | -1.849136 |
| C | -1.617470 | 4.219419  | -0.857574 |
| H | -2.979935 | 4.520016  | 0.787622  |
| H | -0.254408 | 3.613607  | -2.414395 |
| H | -1.542948 | 5.277533  | -1.092717 |
| C | -3.462130 | -0.860265 | -0.521711 |
| C | -3.702377 | -2.244519 | -0.542676 |
| C | -4.457031 | 0.005495  | -0.994963 |
| C | -4.918010 | -2.748564 | -1.002521 |
| H | -2.928848 | -2.929490 | -0.203190 |
| C | -5.668697 | -0.501394 | -1.467273 |
| H | -4.283688 | 1.076608  | -0.998420 |

|   |           |           |           |
|---|-----------|-----------|-----------|
| C | -5.905073 | -1.876855 | -1.467496 |
| H | -5.090637 | -3.821324 | -1.006875 |
| H | -6.429859 | 0.181674  | -1.834847 |
| H | -6.849785 | -2.268370 | -1.834243 |

### 6c-L5

(U)B3LYP-D3(BJ) SCF energy: -1968.48490439 a.u.

(U)B3LYP-D3(BJ) enthalpy: -1967.950385 a.u.

(U)B3LYP-D3(BJ) free energy: -1968.052755 a.u.

(U)B3LYP-D3(BJ) SCF energy in solution: -1968.88353535 a.u.

(U)B3LYP-D3(BJ) enthalpy in solution: -1968.349016 a.u.

(U)B3LYP-D3(BJ) free energy in solution: -1968.451386 a.u.

### Cartesian coordinates

| ATOM | X         | Y         | Z         |
|------|-----------|-----------|-----------|
| Co   | -0.005129 | -0.224879 | -0.030748 |
| P    | 2.188023  | 0.101748  | -0.154857 |
| N    | -0.003488 | -0.329098 | -1.951650 |
| C    | -1.196730 | -0.509713 | -2.754552 |
| C    | 1.184143  | -0.114120 | -2.755219 |
| C    | 2.271802  | 0.615894  | -1.947304 |



|   |           |           |           |
|---|-----------|-----------|-----------|
| H | -1.036212 | -1.233123 | -3.575534 |
| H | 0.962234  | 0.499121  | -3.647874 |
| H | 1.597987  | -1.064854 | -3.145813 |
| H | 2.061779  | 1.691607  | -1.938229 |
| H | 3.270267  | 0.461361  | -2.371809 |
| H | -1.502970 | 0.434596  | -3.247249 |
| C | -2.362508 | -1.022917 | -1.894119 |
| H | -3.330839 | -0.801902 | -2.356167 |
| H | -2.281776 | -2.106908 | -1.756913 |
| P | -2.221236 | -0.299073 | -0.183925 |
| C | 3.306914  | -1.354518 | -0.061050 |
| C | 4.526038  | -1.360406 | 0.628743  |
| C | 2.883950  | -2.527104 | -0.709019 |
| C | 5.312960  | -2.513691 | 0.659051  |
| H | 4.863186  | -0.467060 | 1.143530  |
| C | 3.676742  | -3.672612 | -0.685868 |
| H | 1.926938  | -2.536966 | -1.219858 |
| C | 4.894465  | -3.669314 | -0.000922 |
| H | 6.255448  | -2.506155 | 1.200054  |
| H | 3.339692  | -4.570463 | -1.196759 |
| H | 5.509870  | -4.564385 | 0.022708  |
| C | 3.110073  | 1.428618  | 0.710561  |
| C | 4.289109  | 1.987560  | 0.192605  |

|   |           |           |           |
|---|-----------|-----------|-----------|
| C | 2.608508  | 1.910280  | 1.926805  |
| C | 4.950755  | 3.004533  | 0.879242  |
| H | 4.693685  | 1.622213  | -0.746819 |
| C | 3.271956  | 2.926154  | 2.617016  |
| H | 1.689118  | 1.488072  | 2.324576  |
| C | 4.443239  | 3.474503  | 2.093457  |
| H | 5.861771  | 3.430879  | 0.468361  |
| H | 2.871620  | 3.291698  | 3.558445  |
| H | 4.959012  | 4.268003  | 2.626971  |
| C | -3.436549 | -1.251474 | 0.803480  |
| C | -4.660380 | -1.694465 | 0.278007  |
| C | -3.123733 | -1.549744 | 2.136608  |
| C | -5.550110 | -2.418536 | 1.070811  |
| H | -4.921483 | -1.468587 | -0.751489 |
| C | -4.015705 | -2.269543 | 2.932649  |
| H | -2.171383 | -1.219047 | 2.543387  |
| C | -5.229502 | -2.705761 | 2.399904  |
| H | -6.493552 | -2.758458 | 0.652588  |
| H | -3.760338 | -2.494742 | 3.964297  |
| H | -5.923062 | -3.270984 | 3.016172  |
| C | -2.988710 | 1.365012  | -0.360441 |
| C | -2.256955 | 2.336994  | -1.065287 |
| C | -4.239149 | 1.705984  | 0.170270  |

|   |           |           |           |
|---|-----------|-----------|-----------|
| C | -2.778861 | 3.616069  | -1.248607 |
| H | -1.275788 | 2.078313  | -1.455195 |
| C | -4.753543 | 2.992140  | -0.006993 |
| H | -4.812266 | 0.970371  | 0.724775  |
| C | -4.028498 | 3.947833  | -0.719043 |
| H | -2.206173 | 4.357362  | -1.799518 |
| H | -5.723240 | 3.245311  | 0.413287  |
| H | -4.431747 | 4.947304  | -0.856868 |
| H | 0.003692  | -2.903475 | -2.194810 |
| H | 0.007274  | -3.549742 | -2.569490 |

### 7-L3

(U)B3LYP-D3(BJ) SCF energy: -1620.34217594 a.u.

(U)B3LYP-D3(BJ) enthalpy: -1619.739374 a.u.

(U)B3LYP-D3(BJ) free energy: -1619.845411 a.u.

(U)B3LYP-D3(BJ) SCF energy in solution: -1620.77230048 a.u.

(U)B3LYP-D3(BJ) enthalpy in solution: -1620.169499 a.u.

(U)B3LYP-D3(BJ) free energy in solution: -1620.275536 a.u.

Cartesian coordinates

| ATOM | X | Y | Z |
|------|---|---|---|
|------|---|---|---|

|    |           |           |           |
|----|-----------|-----------|-----------|
| Co | -1.131798 | -0.116099 | -0.368173 |
| N  | -3.227673 | -0.108420 | -0.183329 |
| C  | -3.303615 | -2.325789 | 0.874506  |
| C  | -3.882259 | -1.125678 | 0.513672  |
| C  | -3.951256 | 0.987536  | -0.548956 |
| C  | -3.280430 | 1.978536  | -1.479644 |
| H  | -3.968982 | 2.794743  | -1.706940 |
| H  | -3.026643 | 1.469205  | -2.417539 |
| N  | -2.050661 | 2.571352  | -0.958835 |
| C  | -0.989574 | 1.791936  | -0.605261 |
| C  | -1.805664 | 3.919025  | -0.738700 |
| C  | -0.546524 | 4.006233  | -0.237059 |
| H  | -2.533781 | 4.683904  | -0.960171 |
| H  | 0.043799  | 4.854091  | 0.071938  |
| N  | -0.060963 | 2.700740  | -0.164919 |
| H  | -3.894278 | -3.061148 | 1.403165  |
| N  | -1.984771 | -2.738211 | 0.633741  |
| C  | -1.526257 | -4.025658 | 0.916046  |
| C  | -0.972185 | -1.962208 | 0.133970  |
| C  | -0.205356 | -4.065561 | 0.592947  |
| H  | -2.180559 | -4.786908 | 1.310699  |
| H  | 0.516963  | -4.864460 | 0.649956  |
| N  | 0.117709  | -2.807698 | 0.115275  |

|   |          |           |           |
|---|----------|-----------|-----------|
| C | 1.221700 | 2.335311  | 0.359615  |
| C | 2.335479 | 2.366901  | -0.490484 |
| C | 1.321676 | 1.948277  | 1.703670  |
| C | 3.581717 | 2.042206  | 0.049091  |
| C | 2.588475 | 1.624219  | 2.197074  |
| C | 3.728316 | 1.677794  | 1.390210  |
| H | 4.456258 | 2.064527  | -0.596317 |
| H | 2.683877 | 1.321594  | 3.237178  |
| C | 1.412639 | -2.371142 | -0.306185 |
| C | 2.334984 | -1.954652 | 0.662863  |
| C | 1.707200 | -2.330062 | -1.677375 |
| C | 3.588686 | -1.514982 | 0.231073  |
| C | 2.966585 | -1.865554 | -2.063478 |
| C | 3.918231 | -1.454239 | -1.124435 |
| H | 4.316661 | -1.197509 | 0.971582  |
| H | 3.209416 | -1.825496 | -3.123159 |
| C | 2.177647 | 2.704413  | -1.950920 |
| H | 1.513249 | 1.983209  | -2.441044 |
| H | 1.733228 | 3.695626  | -2.095941 |
| H | 3.144765 | 2.684533  | -2.461422 |
| C | 5.090344 | 1.361078  | 1.957762  |
| H | 5.556036 | 2.254195  | 2.394705  |
| H | 5.028151 | 0.608023  | 2.750765  |

|   |           |           |           |
|---|-----------|-----------|-----------|
| H | 5.767636  | 0.985976  | 1.183605  |
| C | 0.095963  | 1.858031  | 2.576360  |
| H | -0.489560 | 2.783640  | 2.547501  |
| H | -0.568440 | 1.055666  | 2.230331  |
| H | 0.371729  | 1.654582  | 3.615014  |
| C | 0.682967  | -2.758296 | -2.696980 |
| H | 0.301079  | -3.762895 | -2.483345 |
| H | -0.181825 | -2.084516 | -2.684343 |
| H | 1.111001  | -2.756820 | -3.703688 |
| C | 1.965013  | -1.947607 | 2.123845  |
| H | 1.069697  | -1.337711 | 2.288298  |
| H | 1.736979  | -2.953784 | 2.493707  |
| H | 2.778134  | -1.534984 | 2.727254  |
| C | 5.257947  | -0.922731 | -1.571478 |
| H | 5.168600  | 0.110540  | -1.931391 |
| H | 5.982563  | -0.923235 | -0.750777 |
| H | 5.674415  | -1.516429 | -2.392828 |
| C | -5.266863 | 1.204653  | -0.214451 |
| H | -5.781220 | 2.102751  | -0.539009 |
| C | -5.271027 | -0.932564 | 0.882161  |
| H | -5.764238 | -1.724941 | 1.438469  |
| C | -5.939775 | 0.200503  | 0.539989  |
| H | -6.980349 | 0.334800  | 0.824202  |

## 7-L4

(U)B3LYP-D3(BJ) SCF energy: -1598.12308820 a.u.

(U)B3LYP-D3(BJ) enthalpy: -1597.514066 a.u.

(U)B3LYP-D3(BJ) free energy: -1597.606687 a.u.

(U)B3LYP-D3(BJ) SCF energy in solution: -1598.44027919 a.u.

(U)B3LYP-D3(BJ) enthalpy in solution: -1597.831257 a.u.

(U)B3LYP-D3(BJ) free energy in solution: -1597.923878 a.u.

### Cartesian coordinates

| ATOM | X         | Y         | Z         |
|------|-----------|-----------|-----------|
| Co   | 0.003091  | 0.811594  | -0.534847 |
| P    | 1.851130  | -0.405157 | -0.015245 |
| N    | 0.064111  | 1.546090  | 1.519660  |
| C    | -0.992754 | 1.020487  | 2.389375  |
| C    | 1.415393  | 1.415634  | 2.077458  |
| C    | 2.019995  | 0.028742  | 1.798960  |
| C    | 1.975216  | -2.280687 | 0.052991  |
| C    | 3.180870  | -2.838900 | 0.818373  |
| C    | 1.869019  | -2.900667 | -1.346543 |
| C    | 3.481296  | 0.119534  | -0.801365 |

|   |           |           |           |
|---|-----------|-----------|-----------|
| C | 3.301684  | 0.196840  | -2.326435 |
| C | 3.969321  | 1.475077  | -0.271600 |
| H | -1.174860 | 1.688954  | 3.247590  |
| H | 1.426082  | 1.610192  | 3.162931  |
| H | 2.029696  | 2.187374  | 1.607202  |
| H | 1.459540  | -0.736459 | 2.350801  |
| H | 3.054899  | -0.018418 | 2.156284  |
| H | 4.123654  | -2.593147 | 0.317131  |
| H | 3.120712  | -3.933193 | 0.876771  |
| H | 3.233734  | -2.453990 | 1.841572  |
| H | 1.043041  | -2.464373 | -1.918652 |
| H | 1.702106  | -3.982358 | -1.273690 |
| H | 2.791857  | -2.751491 | -1.917326 |
| H | 2.976432  | -0.752951 | -2.759767 |
| H | 4.247981  | 0.478125  | -2.805516 |
| H | 2.552483  | 0.954557  | -2.580275 |
| H | 3.220394  | 2.253954  | -0.449489 |
| H | 4.886497  | 1.769454  | -0.796516 |
| H | 4.196312  | 1.448287  | 0.798714  |
| H | -0.652622 | 0.065638  | 2.802621  |
| C | -2.296699 | 0.808318  | 1.610032  |
| H | -3.060985 | 0.355904  | 2.253495  |
| H | -2.680443 | 1.781246  | 1.281253  |



|   |           |           |           |
|---|-----------|-----------|-----------|
| P | -1.979185 | -0.184920 | 0.052269  |
| C | -2.422959 | -1.937574 | 0.580600  |
| C | -3.429087 | 0.362467  | -1.015719 |
| C | -1.674234 | -2.341714 | 1.857112  |
| H | -1.859072 | -3.398888 | 2.084343  |
| H | -0.592515 | -2.211770 | 1.744711  |
| H | -1.994844 | -1.756685 | 2.724166  |
| C | -2.120996 | -2.919911 | -0.558604 |
| H | -2.333766 | -3.949663 | -0.244949 |
| H | -2.721237 | -2.712943 | -1.449296 |
| H | -1.066326 | -2.864666 | -0.849542 |
| C | -3.188527 | 0.031035  | -2.494973 |
| H | -3.963294 | 0.494618  | -3.118138 |
| H | -2.215471 | 0.407319  | -2.826073 |
| H | -3.220142 | -1.048007 | -2.681815 |
| C | -4.813064 | -0.094715 | -0.544374 |
| H | -4.947752 | -1.173635 | -0.682540 |
| H | -4.985504 | 0.134085  | 0.513280  |
| H | -5.597229 | 0.406242  | -1.125640 |
| H | -3.370824 | 1.454744  | -0.920813 |
| H | -3.497355 | -1.965866 | 0.799219  |
| H | 1.065305  | -2.554483 | 0.602214  |
| H | 4.240284  | -0.637225 | -0.565334 |

|   |           |          |           |
|---|-----------|----------|-----------|
| N | -0.130477 | 3.913025 | -0.018244 |
| H | -0.960963 | 4.500092 | -0.090549 |
| H | 0.651475  | 4.567217 | -0.035573 |
| H | -0.106375 | 2.540008 | 1.250866  |
| B | -0.052562 | 2.962756 | -1.239685 |
| H | -1.045902 | 2.179774 | -1.198803 |
| H | -0.053095 | 3.463443 | -2.351168 |
| H | 0.995999  | 2.265717 | -1.151406 |

### 7-L5

(U)B3LYP-D3(BJ) SCF energy: -2050.59584245 a.u.

(U)B3LYP-D3(BJ) enthalpy: -2050.000379 a.u.

(U)B3LYP-D3(BJ) free energy: -2050.101131 a.u.

(U)B3LYP-D3(BJ) SCF energy in solution: -2051.03175460 a.u.

(U)B3LYP-D3(BJ) enthalpy in solution: -2050.436291 a.u.

(U)B3LYP-D3(BJ) free energy in solution: -2050.537043 a.u.

### Cartesian coordinates

| ATOM | X        | Y         | Z         |
|------|----------|-----------|-----------|
| Co   | 0.086088 | -1.525041 | 0.196537  |
| P    | 1.833342 | -0.085199 | -0.053462 |

|   |           |           |           |
|---|-----------|-----------|-----------|
| N | 0.230433  | -1.832083 | -1.953278 |
| C | -0.799225 | -1.166071 | -2.760009 |
| C | 1.603122  | -1.570116 | -2.403633 |
| C | 2.100044  | -0.204706 | -1.909010 |
| H | -0.993420 | -1.717764 | -3.693953 |
| H | 1.691729  | -1.622077 | -3.501382 |
| H | 2.234076  | -2.363930 | -1.991256 |
| H | 1.521241  | 0.602368  | -2.371679 |
| H | 3.150662  | -0.052720 | -2.177630 |
| H | -0.423750 | -0.182080 | -3.057918 |
| C | -2.109528 | -0.999546 | -1.982479 |
| H | -2.818135 | -0.379338 | -2.542563 |
| H | -2.572246 | -1.980757 | -1.828332 |
| P | -1.811501 | -0.339352 | -0.249952 |
| C | 3.517611  | -0.487474 | 0.585674  |
| C | 3.872333  | -1.843879 | 0.669405  |
| C | 4.452600  | 0.481403  | 0.976511  |
| C | 5.141750  | -2.219294 | 1.107960  |
| H | 3.141748  | -2.604938 | 0.412403  |
| C | 5.718013  | 0.102470  | 1.426811  |
| H | 4.192223  | 1.533593  | 0.935123  |
| C | 6.068742  | -1.246983 | 1.487882  |
| H | 5.400847  | -3.272973 | 1.165741  |

|   |           |           |           |
|---|-----------|-----------|-----------|
| H | 6.430289  | 0.864884  | 1.731031  |
| H | 7.054694  | -1.539523 | 1.838296  |
| C | 1.693277  | 1.722313  | 0.223032  |
| C | 2.353570  | 2.676223  | -0.565730 |
| C | 0.856373  | 2.161497  | 1.257904  |
| C | 2.180392  | 4.038836  | -0.322642 |
| H | 3.009249  | 2.355397  | -1.370100 |
| C | 0.687254  | 3.522389  | 1.505859  |
| H | 0.316760  | 1.427034  | 1.848888  |
| C | 1.347566  | 4.462961  | 0.714509  |
| H | 2.695240  | 4.768611  | -0.941785 |
| H | 0.021554  | 3.848007  | 2.299101  |
| H | 1.205871  | 5.524228  | 0.898551  |
| C | -1.985629 | 1.486044  | -0.422207 |
| C | -1.262905 | 2.172557  | -1.410800 |
| C | -2.726612 | 2.237627  | 0.502499  |
| C | -1.296128 | 3.562651  | -1.488111 |
| H | -0.652823 | 1.621637  | -2.117862 |
| C | -2.757443 | 3.630474  | 0.427577  |
| H | -3.289088 | 1.731648  | 1.280247  |
| C | -2.046043 | 4.298209  | -0.569186 |
| H | -0.722534 | 4.071964  | -2.256908 |
| H | -3.341944 | 4.193322  | 1.150569  |

|   |           |           |           |
|---|-----------|-----------|-----------|
| H | -2.066970 | 5.382837  | -0.624516 |
| C | -3.390067 | -0.795929 | 0.573538  |
| C | -4.640163 | -0.416594 | 0.059172  |
| C | -3.340517 | -1.567155 | 1.741532  |
| C | -5.815324 | -0.803969 | 0.699652  |
| H | -4.691715 | 0.195897  | -0.836706 |
| C | -4.518291 | -1.953797 | 2.385255  |
| H | -2.376672 | -1.876977 | 2.133863  |
| C | -5.755295 | -1.573892 | 1.865096  |
| H | -6.777699 | -0.505411 | 0.292894  |
| H | -4.466695 | -2.554049 | 3.289159  |
| H | -6.672008 | -1.875678 | 2.364165  |
| N | 0.034446  | -4.449314 | -0.933526 |
| H | 0.820192  | -5.094521 | -1.008350 |
| H | 0.076606  | -2.864481 | -1.887137 |
| H | -0.794841 | -5.035145 | -1.024823 |
| B | 0.037533  | -3.761711 | 0.454098  |
| H | -0.002001 | -4.470840 | 1.443446  |
| H | 1.075924  | -3.047020 | 0.558405  |
| H | -0.967053 | -2.996016 | 0.516486  |

### TS4-L3

(U)B3LYP-D3(BJ) SCF energy: -2006.46650436 a.u.

(U)B3LYP-D3(BJ) enthalpy: -2005.695501 a.u.

(U)B3LYP-D3(BJ) free energy: -2005.817825 a.u.

(U)B3LYP-D3(BJ) SCF energy in solution: -2007.00851923 a.u.

(U)B3LYP-D3(BJ) enthalpy in solution: -2006.237516 a.u.

(U)B3LYP-D3(BJ) free energy in solution: -2006.359840 a.u.

Imaginary frequency: -1160.9570 cm<sup>-1</sup>

#### Cartesian coordinates

| ATOM | X        | Y         | Z         |
|------|----------|-----------|-----------|
| Co   | 0.848340 | -0.100517 | 0.189470  |
| N    | 2.493934 | 0.147441  | -1.187163 |
| C    | 2.262008 | -2.219797 | -1.533260 |
| C    | 2.920429 | -0.958688 | -1.851860 |
| C    | 3.181013 | 1.292048  | -1.284148 |
| C    | 2.773913 | 2.383826  | -0.321470 |
| H    | 3.317100 | 3.304859  | -0.545035 |
| H    | 3.062648 | 2.065937  | 0.686127  |
| H    | 2.281830 | -1.701977 | 2.999038  |
| N    | 1.351174 | 2.696391  | -0.321836 |
| C    | 0.365352 | 1.780174  | -0.019147 |
| C    | 0.845965 | 3.961251  | -0.586782 |

|   |           |           |           |
|---|-----------|-----------|-----------|
| C | -0.495502 | 3.873269  | -0.452659 |
| H | 1.481545  | 4.798499  | -0.830099 |
| H | -1.273297 | 4.613316  | -0.546241 |
| N | -0.779094 | 2.547008  | -0.114950 |
| H | 2.697695  | -3.072681 | -2.052796 |
| H | 2.273248  | -2.153458 | -0.041941 |
| N | 0.806356  | -2.284196 | -1.674233 |
| C | 0.149487  | -3.315554 | -2.329989 |
| C | -0.055717 | -1.512839 | -0.947160 |
| C | -1.164417 | -3.216154 | -2.007323 |
| H | 0.672239  | -4.019659 | -2.958694 |
| H | -2.017670 | -3.818149 | -2.275714 |
| N | -1.275739 | -2.105628 | -1.168538 |
| C | -2.138896 | 2.135719  | 0.059131  |
| C | -2.614037 | 1.779210  | 1.328967  |
| C | -3.003090 | 2.250957  | -1.043931 |
| C | -3.995223 | 1.632837  | 1.492765  |
| C | -4.373593 | 2.107639  | -0.826609 |
| C | -4.891488 | 1.831969  | 0.441669  |
| H | -4.378178 | 1.378428  | 2.477893  |
| H | -5.052660 | 2.218194  | -1.669614 |
| C | -2.465214 | -1.862687 | -0.409854 |
| C | -3.606484 | -1.383522 | -1.062063 |

|   |           |           |           |
|---|-----------|-----------|-----------|
| C | -2.490236 | -2.240565 | 0.945161  |
| C | -4.801449 | -1.314328 | -0.339148 |
| C | -3.699009 | -2.122015 | 1.632423  |
| C | -4.867667 | -1.677944 | 1.005585  |
| H | -5.697300 | -0.960995 | -0.843366 |
| H | -3.736089 | -2.418153 | 2.678674  |
| C | -1.677224 | 1.584693  | 2.491859  |
| H | -1.070466 | 0.682821  | 2.352078  |
| H | -0.975565 | 2.420512  | 2.587755  |
| H | -2.236067 | 1.486178  | 3.427288  |
| C | -6.382353 | 1.745422  | 0.653985  |
| H | -6.886539 | 2.648678  | 0.290346  |
| H | -6.815660 | 0.894630  | 0.115173  |
| H | -6.629396 | 1.625961  | 1.712913  |
| C | -2.470279 | 2.521837  | -2.430806 |
| H | -2.235945 | 3.580961  | -2.591262 |
| H | -1.547882 | 1.960249  | -2.610425 |
| H | -3.207616 | 2.228735  | -3.183776 |
| C | -1.276765 | -2.826446 | 1.620592  |
| H | -0.916788 | -3.708083 | 1.076258  |
| H | -0.431026 | -2.133636 | 1.645240  |
| H | -1.518784 | -3.130673 | 2.643724  |
| C | -3.554382 | -0.972920 | -2.511796 |



|   |           |           |           |
|---|-----------|-----------|-----------|
| H | -2.633730 | -0.424397 | -2.728757 |
| H | -3.577047 | -1.839846 | -3.184253 |
| H | -4.407210 | -0.334710 | -2.760351 |
| C | -6.157848 | -1.585638 | 1.782412  |
| H | -6.157592 | -0.714147 | 2.449452  |
| H | -7.021905 | -1.489232 | 1.117654  |
| H | -6.309353 | -2.471508 | 2.409543  |
| C | 4.308673  | 1.433700  | -2.088060 |
| H | 4.835903  | 2.380919  | -2.135862 |
| C | 4.078657  | -0.890669 | -2.657633 |
| H | 4.410468  | -1.780683 | -3.183533 |
| C | 4.763208  | 0.308132  | -2.783513 |
| H | 5.642639  | 0.373731  | -3.419084 |
| C | 2.835451  | -1.812381 | 2.053826  |
| O | 1.872904  | -1.803005 | 1.018321  |
| C | 3.801579  | -0.638502 | 1.970223  |
| C | 3.708560  | 0.412535  | 2.889662  |
| C | 4.788778  | -0.570853 | 0.978830  |
| C | 4.583855  | 1.500495  | 2.833194  |
| H | 2.944374  | 0.372165  | 3.662582  |
| C | 5.661365  | 0.513476  | 0.912612  |
| H | 4.863601  | -1.361764 | 0.239762  |
| C | 5.565804  | 1.552473  | 1.842909  |

|   |          |           |          |
|---|----------|-----------|----------|
| H | 4.498082 | 2.303319  | 3.560876 |
| H | 6.411672 | 0.550878  | 0.128533 |
| H | 6.250204 | 2.395205  | 1.793935 |
| C | 3.557954 | -3.163759 | 2.089545 |
| H | 4.262885 | -3.216556 | 2.927141 |
| H | 2.820982 | -3.966542 | 2.192823 |
| H | 4.114752 | -3.334863 | 1.161925 |

#### TS4-L4

(U)B3LYP-D3(BJ) SCF energy: -1598.10691221 a.u.

(U)B3LYP-D3(BJ) enthalpy: -1597.499732 a.u.

(U)B3LYP-D3(BJ) free energy: -1597.593358 a.u.

(U)B3LYP-D3(BJ) SCF energy in solution: -1598.42847663 a.u.

(U)B3LYP-D3(BJ) enthalpy in solution: -1597.821296 a.u.

(U)B3LYP-D3(BJ) free energy in solution: -1597.914922 a.u.

Imaginary frequency: -129.6137 cm<sup>-1</sup>

#### Cartesian coordinates

| ATOM | X         | Y         | Z         |
|------|-----------|-----------|-----------|
| Co   | 0.040458  | -0.302117 | -0.405146 |
| P    | -2.164310 | 0.255867  | -0.013615 |

|   |           |           |           |
|---|-----------|-----------|-----------|
| N | 0.001418  | -1.208943 | 1.561887  |
| C | 0.899705  | -0.517145 | 2.487347  |
| C | -1.358874 | -1.434135 | 2.060589  |
| C | -2.279970 | -0.232092 | 1.786302  |
| C | -2.619417 | 2.074472  | 0.061428  |
| C | -3.954735 | 2.376799  | 0.752492  |
| C | -2.545239 | 2.720200  | -1.328230 |
| C | -3.592186 | -0.569432 | -0.912556 |
| C | -3.227867 | -0.688076 | -2.401682 |
| C | -3.924856 | -1.953553 | -0.339274 |
| H | 0.985344  | -1.054801 | 3.447512  |
| H | -1.362298 | -1.659895 | 3.139627  |
| H | -1.743542 | -2.316304 | 1.541915  |
| H | -1.932691 | 0.637124  | 2.359686  |
| H | -3.304379 | -0.441722 | 2.112145  |
| H | -4.799674 | 1.970945  | 0.185356  |
| H | -4.105218 | 3.460835  | 0.828883  |
| H | -3.997799 | 1.961771  | 1.764325  |
| H | -1.590945 | 2.502414  | -1.819841 |
| H | -2.651624 | 3.808835  | -1.249074 |
| H | -3.350790 | 2.358741  | -1.976961 |
| H | -2.994446 | 0.282061  | -2.851401 |
| H | -4.064919 | -1.125912 | -2.959593 |

|   |           |           |           |
|---|-----------|-----------|-----------|
| H | -2.353848 | -1.336052 | -2.524284 |
| H | -3.061042 | -2.620873 | -0.417343 |
| H | -4.744833 | -2.399056 | -0.915574 |
| H | -4.244003 | -1.907429 | 0.706702  |
| H | 0.487162  | 0.474185  | 2.713911  |
| B | 0.152059  | -2.918980 | -1.119555 |
| H | 0.476990  | -3.440122 | -2.179470 |
| H | 0.459424  | -1.692391 | -1.340891 |
| H | -1.050614 | -3.013303 | -0.930467 |
| N | 0.919992  | -3.423689 | 0.138801  |
| H | 0.590191  | -4.357830 | 0.378957  |
| H | 1.910902  | -3.541881 | -0.072906 |
| H | 0.421927  | -2.124391 | 1.248184  |
| C | 2.289157  | -0.377409 | 1.850294  |
| H | 2.940092  | 0.251040  | 2.468871  |
| H | 2.750236  | -1.369518 | 1.788555  |
| P | 2.147779  | 0.263262  | 0.091156  |
| C | 2.678983  | 2.053042  | 0.272128  |
| C | 3.577003  | -0.621689 | -0.741362 |
| C | 4.967822  | -0.168570 | -0.284253 |
| H | 5.740246  | -0.821706 | -0.708714 |
| H | 5.185601  | 0.852246  | -0.617814 |
| H | 5.071124  | -0.195371 | 0.806435  |

|   |           |           |           |
|---|-----------|-----------|-----------|
| C | 3.428829  | -0.618116 | -2.268981 |
| H | 2.447067  | -1.001084 | -2.561648 |
| H | 3.547605  | 0.386204  | -2.689214 |
| H | 4.196368  | -1.257608 | -2.722167 |
| C | 1.676835  | 2.785786  | 1.175141  |
| H | 0.663627  | 2.722808  | 0.758484  |
| H | 1.650602  | 2.369564  | 2.187116  |
| H | 1.942420  | 3.846874  | 1.257492  |
| C | 2.765053  | 2.740004  | -1.096434 |
| H | 1.817067  | 2.641863  | -1.639699 |
| H | 2.974706  | 3.810019  | -0.974775 |
| H | 3.554753  | 2.315371  | -1.722279 |
| H | -4.473176 | 0.076380  | -0.804704 |
| H | -1.810464 | 2.499796  | 0.672788  |
| H | 3.420521  | -1.656570 | -0.408228 |
| H | 3.666291  | 2.077736  | 0.751208  |

#### **TS4-L5**

(U)B3LYP-D3(BJ) SCF energy: -2050.58047468 a.u.

(U)B3LYP-D3(BJ) enthalpy: -2049.986708 a.u.

(U)B3LYP-D3(BJ) free energy: -2050.088306 a.u.

(U)B3LYP-D3(BJ) SCF energy in solution: -2051.01908373 a.u.

(U)B3LYP-D3(BJ) enthalpy in solution: -2050.425317 a.u.

(U)B3LYP-D3(BJ) free energy in solution: -2050.526915 a.u.

Imaginary frequency: -31.9827 cm<sup>-1</sup>

#### Cartesian coordinates

| ATOM | X         | Y         | Z        |
|------|-----------|-----------|----------|
| Co   | -0.015701 | -0.749400 | 0.009478 |
| P    | -2.181241 | -0.171136 | 0.105361 |
| N    | -0.045105 | -0.490880 | 2.164600 |
| C    | 1.189767  | 0.035926  | 2.754694 |
| C    | -1.262212 | 0.139100  | 2.690583 |
| C    | -2.485956 | -0.388751 | 1.935055 |
| H    | 1.266469  | -0.215062 | 3.825880 |
| H    | -1.184898 | 1.226150  | 2.556593 |
| H    | -1.381347 | -0.049242 | 3.770599 |
| H    | -3.402391 | 0.113130  | 2.262894 |
| H    | -2.604020 | -1.462552 | 2.111387 |
| H    | 1.169835  | 1.130605  | 2.680767 |
| B    | 0.068726  | -3.508491 | 0.778705 |
| H    | -0.573387 | -4.382093 | 0.209532 |
| H    | 1.271005  | -3.695298 | 0.708576 |
| H    | -0.203654 | -2.474016 | 0.055845 |

|   |           |           |           |
|---|-----------|-----------|-----------|
| N | -0.340973 | -3.257875 | 2.256937  |
| H | -1.303356 | -3.544330 | 2.430833  |
| H | 0.226953  | -3.830722 | 2.877167  |
| H | -0.112384 | -1.534705 | 2.352673  |
| C | 2.409633  | -0.516880 | 2.007049  |
| H | 3.345473  | -0.086701 | 2.380877  |
| H | 2.468485  | -1.603428 | 2.137424  |
| P | 2.175038  | -0.276911 | 0.177104  |
| C | 3.643908  | -1.085078 | -0.560672 |
| C | 4.866155  | -0.420003 | -0.732603 |
| C | 3.523574  | -2.426873 | -0.952800 |
| C | 5.956649  | -1.090549 | -1.285695 |
| H | 4.961884  | 0.622289  | -0.442946 |
| C | 4.620551  | -3.095080 | -1.497431 |
| H | 2.577567  | -2.942023 | -0.813732 |
| C | 5.835665  | -2.428786 | -1.667212 |
| H | 6.900115  | -0.568367 | -1.420160 |
| H | 4.521914  | -4.135351 | -1.794443 |
| H | 6.686195  | -2.949086 | -2.099116 |
| C | 2.468799  | 1.514376  | -0.116821 |
| C | 2.989355  | 2.396514  | 0.839204  |
| C | 2.090273  | 2.027365  | -1.369426 |
| C | 3.117127  | 3.758470  | 0.555753  |

|   |           |           |           |
|---|-----------|-----------|-----------|
| H | 3.297801  | 2.027611  | 1.811883  |
| C | 2.228744  | 3.383468  | -1.658197 |
| H | 1.680418  | 1.353074  | -2.117829 |
| C | 2.736689  | 4.255243  | -0.690889 |
| H | 3.516663  | 4.430008  | 1.310638  |
| H | 1.936497  | 3.760719  | -2.634321 |
| H | 2.836522  | 5.314588  | -0.909421 |
| C | -3.565302 | -1.085622 | -0.669604 |
| C | -3.480349 | -2.488957 | -0.629234 |
| C | -4.646213 | -0.482697 | -1.325259 |
| C | -4.481939 | -3.267948 | -1.204944 |
| H | -2.616444 | -2.967499 | -0.174041 |
| C | -5.641026 | -1.269131 | -1.909677 |
| H | -4.710094 | 0.598269  | -1.389661 |
| C | -5.566020 | -2.660606 | -1.843999 |
| H | -4.406259 | -4.350987 | -1.167162 |
| H | -6.474307 | -0.791166 | -2.417711 |
| H | -6.341938 | -3.270048 | -2.298882 |
| C | -2.520490 | 1.620589  | -0.110346 |
| C | -3.685780 | 2.251057  | 0.354308  |
| C | -1.508571 | 2.406710  | -0.679061 |
| C | -3.837684 | 3.632083  | 0.236704  |
| H | -4.477308 | 1.661867  | 0.808900  |



|   |           |          |           |
|---|-----------|----------|-----------|
| C | -1.653010 | 3.790315 | -0.786548 |
| H | -0.593862 | 1.931629 | -1.020920 |
| C | -2.820626 | 4.404066 | -0.332423 |
| H | -4.745875 | 4.108389 | 0.595653  |
| H | -0.848304 | 4.381611 | -1.214171 |
| H | -2.938338 | 5.481052 | -0.413809 |

### TS5-L3

(U)B3LYP-D3(BJ) SCF energy: -1621.48874422 a.u.

(U)B3LYP-D3(BJ) enthalpy: -1620.872527 a.u.

(U)B3LYP-D3(BJ) free energy: -1620.974867 a.u.

(U)B3LYP-D3(BJ) SCF energy in solution: -1621.91866632 a.u.

(U)B3LYP-D3(BJ) enthalpy in solution: -1621.302449 a.u.

(U)B3LYP-D3(BJ) free energy in solution: -1621.404789 a.u.

Imaginary frequency: -1313.9546 cm<sup>-1</sup>

### Cartesian coordinates

| ATOM | X         | Y         | Z         |
|------|-----------|-----------|-----------|
| Co   | -1.552013 | -0.210561 | -1.087985 |
| N    | -3.416491 | -0.221125 | -0.143873 |
| C    | -3.036831 | -2.582256 | -0.001311 |

|   |           |           |           |
|---|-----------|-----------|-----------|
| C | -3.862340 | -1.425403 | 0.307132  |
| C | -4.246950 | 0.839411  | -0.133055 |
| C | -3.749403 | 2.056638  | -0.882600 |
| H | -4.435706 | 2.896228  | -0.749617 |
| H | -3.717616 | 1.808745  | -1.951903 |
| H | -2.305841 | -1.594520 | -2.077793 |
| N | -2.419604 | 2.489523  | -0.479865 |
| C | -1.308943 | 1.682985  | -0.592214 |
| C | -2.150546 | 3.681977  | 0.177971  |
| C | -0.832628 | 3.658775  | 0.482055  |
| H | -2.907279 | 4.431670  | 0.350013  |
| H | -0.197194 | 4.375392  | 0.977236  |
| N | -0.334755 | 2.443072  | 0.007798  |
| H | -3.509498 | -3.534705 | 0.231810  |
| H | -2.786121 | -2.217103 | -1.377089 |
| N | -1.645204 | -2.625815 | 0.372932  |
| C | -1.020402 | -3.790705 | 0.807615  |
| C | -0.736126 | -1.677955 | -0.032380 |
| C | 0.312497  | -3.585560 | 0.697798  |
| H | -1.578575 | -4.648136 | 1.150193  |
| H | 1.149640  | -4.228192 | 0.915647  |
| N | 0.482176  | -2.292117 | 0.200685  |
| C | 1.008876  | 2.051662  | 0.318009  |

|   |          |           |           |
|---|----------|-----------|-----------|
| C | 2.027452 | 2.263125  | -0.617893 |
| C | 1.272608 | 1.589407  | 1.615178  |
| C | 3.347229 | 2.076226  | -0.199554 |
| C | 2.606952 | 1.434854  | 1.993938  |
| C | 3.656152 | 1.698938  | 1.109812  |
| H | 4.151891 | 2.241883  | -0.911881 |
| H | 2.830780 | 1.095039  | 3.002125  |
| C | 1.777528 | -1.804103 | -0.159610 |
| C | 2.770369 | -1.740362 | 0.830629  |
| C | 2.074252 | -1.515459 | -1.506054 |
| C | 4.078731 | -1.432941 | 0.445783  |
| C | 3.388920 | -1.176413 | -1.831414 |
| C | 4.409063 | -1.146460 | -0.877253 |
| H | 4.852021 | -1.395732 | 1.208987  |
| H | 3.625536 | -0.956457 | -2.870291 |
| C | 1.700245 | 2.680998  | -2.028051 |
| H | 1.096318 | 1.915535  | -2.528201 |
| H | 1.115626 | 3.608131  | -2.047847 |
| H | 2.613118 | 2.836411  | -2.610238 |
| C | 5.090129 | 1.595523  | 1.566381  |
| H | 5.749584 | 1.280068  | 0.752647  |
| H | 5.457935 | 2.564610  | 1.929135  |
| H | 5.197199 | 0.879192  | 2.387306  |

|   |           |           |           |
|---|-----------|-----------|-----------|
| C | 0.140754  | 1.248905  | 2.550818  |
| H | -0.485803 | 2.120372  | 2.774099  |
| H | -0.509862 | 0.495482  | 2.090261  |
| H | 0.524586  | 0.853645  | 3.495954  |
| C | 1.037312  | -1.601525 | -2.594051 |
| H | 0.411280  | -2.492041 | -2.492634 |
| H | 0.347519  | -0.747093 | -2.565367 |
| H | 1.516316  | -1.615709 | -3.578245 |
| C | 2.453200  | -1.978830 | 2.287080  |
| H | 1.471800  | -1.572526 | 2.547574  |
| H | 2.440062  | -3.044734 | 2.545511  |
| H | 3.205775  | -1.499129 | 2.919859  |
| C | 5.818411  | -0.781694 | -1.273229 |
| H | 5.897527  | 0.286445  | -1.515871 |
| H | 6.528508  | -0.991528 | -0.467077 |
| H | 6.142185  | -1.335700 | -2.161973 |
| C | -5.528111 | 0.786857  | 0.393410  |
| H | -6.159589 | 1.669922  | 0.393681  |
| C | -5.169171 | -1.550562 | 0.825418  |
| H | -5.508324 | -2.520549 | 1.176071  |
| C | -5.994123 | -0.441707 | 0.889673  |
| H | -6.992936 | -0.520627 | 1.309588  |

## NH2-BH2

(U)B3LYP-D3(BJ) SCF energy: -82.04135885 a.u.

(U)B3LYP-D3(BJ) enthalpy: -81.989121 a.u.

(U)B3LYP-D3(BJ) free energy: -82.015727 a.u.

(U)B3LYP-D3(BJ) SCF energy in solution: -82.08003005 a.u.

(U)B3LYP-D3(BJ) enthalpy in solution: -82.027792 a.u.

(U)B3LYP-D3(BJ) free energy in solution: -82.054398 a.u.

## Cartesian coordinates

| ATOM | X         | Y         | Z         |
|------|-----------|-----------|-----------|
| N    | -0.612255 | 0.000000  | 0.000134  |
| H    | -1.167813 | -0.844837 | 0.000465  |
| H    | -1.167816 | 0.844834  | -0.001206 |
| B    | 0.780232  | 0.000000  | 0.000009  |
| H    | 1.360128  | -1.047113 | -0.000794 |
| H    | 1.360128  | 1.047113  | 0.000554  |

## NH3-BH3

(U)B3LYP-D3(BJ) SCF energy: -83.21722354 a.u.

(U)B3LYP-D3(BJ) enthalpy: -83.142236 a.u.  
(U)B3LYP-D3(BJ) free energy: -83.169469 a.u.  
(U)B3LYP-D3(BJ) SCF energy in solution: -83.27369637 a.u.  
(U)B3LYP-D3(BJ) enthalpy in solution: -83.198709 a.u.  
(U)B3LYP-D3(BJ) free energy in solution: -83.225942 a.u.

Cartesian coordinates

| ATOM | X         | Y         | Z         |
|------|-----------|-----------|-----------|
| N    | 0.000000  | 0.000000  | 0.730656  |
| H    | 0.523152  | -0.795479 | 1.097056  |
| H    | -0.950481 | -0.055323 | 1.097056  |
| H    | 0.427329  | 0.850803  | 1.097056  |
| B    | 0.000000  | 0.000000  | -0.936657 |
| H    | 1.170591  | 0.069424  | -1.240824 |
| H    | -0.525172 | -1.048473 | -1.240824 |
| H    | -0.645418 | 0.979049  | -1.240824 |
